# Supplementary material for: The atlas of human cardiac promoters and enhancers reveals an important role for regulatory elements in heart failure
Source: Research Square preprint supplement (doi:10.21203/rs.3.rs-1010746/v1), 2021-10-28
Supplement: Supplementary file 1 [file 8ec48c326997fa58445a4ba3.xlsx]

## Sheet: Donor demographics
Subject #	Primary Phenotype	Cardiomyopathy type	Cardiomyopathy subtype	Sex	Age	Ethnicity	BMI	LVEF (%)	Cause of Death	CAGE	RNA-Seq	CAGE						RNA-Seq
1	Healthy	None	None	Female	26	African (Kenya)	36.1	60-65	Infectious Disease	LA, RA, LV, RV	LA, RA, LV, RV	LA	RA	LV	RV			LA	RA	LV	RV
2	Healthy	None	None	Female	35	Asian (Korean)	31.5	65	CVA/Stroke	LA, RA, LV, RV	RA	LA	RA	LV	RV				RA
3	Healthy	None	None	Female	36	Asian (Filipino)	31.7	N/A	CVA/Stroke	LA, RA, LV, RV	LA, RA, LV, RV	LA	RA	LV	RV			LA	RA	LV	RV
4	Healthy	None	None	Female	39	African (Gumuz)	36	45-50	Anoxia	LA, RA, LV, RV	LA, RV	LA	RA	LV	RV			LA			RV
5	Healthy	None	None	Female	46	Asian	28	55	CVA/Stroke	LA, RA, LV, RV		LA	RA	LV	RV	sSAN	iSAN
6	Healthy	None	None	Female	53	Western European	41.7	52	Anoxia/Drug Intoxication	LA, LV		LA		LV
7	Healthy	None	None	Female	56	Hispanic or Latino	38.9	N/A	Anoxia	LA, RA, LV, RV		LA	RA	LV	RV	sSAN	iSAN
8	Healthy	None	None	Female	60	European-African	24.2	60-65	CVA/ICH/Stroke	LA, LV		LA		LV
9	Healthy	None	None	Female	60	White or Caucasian	28	N/A	CVA/Stroke	LA, RA, LV, RV		LA	RA	LV	RV
10	Healthy	None	None	Female	64	Western European	21	60	CVA/ICH/Stroke	LA, LV		LA		LV
11	Healthy	None	None	Female	71	White or Caucasian	27	43	Anoxia	LA, RA, LV, RV		LA	RA	LV	RV	sSAN	iSAN
12	Healthy	None	None	Male	26	European-Native American	26.4	65	Anoxia/Drug Intoxication	LA, RA, LV, RV	LA, LV, RV	LA	RA	LV	RV			LA		LV	RV
13	Healthy	None	None	Male	28	African (Kenya)	18.3	25-30	Anoxia/Cardiovascular	LA, RA, LV, RV	LV, RV	LA	RA	LV	RV					LV	RV
14	Healthy	None	None	Male	34	African (Gumuz)	38.2	65	Anoxia	LA, RA, LV, RV	LA, RA, LV, RV	LA	RA	LV	RV			LA	RA	LV	RV
15	Healthy	None	None	Male	43	Western European	27.8	N/A	Head Trauma/Blunt Injury	LA, LV		LA		LV
16	Healthy	None	None	Male	47	Asian Indian	23.9	25-30	Cardiac arrest (DCD)	LA, RA, LV, RV		LA	RA	LV	RV
17	Healthy	None	None	Male	51	African	26.3	N/A	CVA/ICH/Stroke	LA		LA
18	Healthy	None	None	Male	53	White or Caucasian	38	N/A	CVA/Stroke	LA, RA, LV, RV		LA	RA	LV	RV
19	Healthy	None	None	Male	57	Asian	41	60	CVA/Stroke	LA, RA, LV, RV		LA	RA	LV	RV
20	Healthy	None	None	Male	60	European-Native American	22.8	N/A	CVA/ICH/Stroke	LA, LV		LA		LV
21	Healthy	None	None	Male	61	Western European	23.2	N/A	Head Trauma	LA, LV		LA		LV
22	Failing	NICM	NA	Female	45	Black or African American	27.1	N/A		LA, RA, LV, RV		LA	RA	LV	RV
23	Failing	ICM	NA	Female	52	Asian	21	N/A		LA, RA, LV, RV		LA	RA	LV	RV
24	Failing	NICM	HFpEF	Female	59	White or Caucasian	31.9	N/A		LA, RA, LV, RV		LA	RA	LV	RV
25	Failing	NICM	Genetic	Male	36	Hispanic or Latino	24.1	N/A		LA, RA, LV, RV		LA	RA	LV	RV
26	Failing	NICM	NA	Male	47	N/A	20.8	N/A		RA			RA		RV
27	Failing	ICM	NA	Male	48	White or Caucasian	25.6	N/A		LA, LV, RV		LA		LV	RV
28	Failing	NICM	NA	Male	51	White or Caucasian	28.5	N/A		LA, RA, LV, RV		LA	RA	LV	RV
29	Failing	ICM	NA	Male	57	Asian	27.5	N/A		LV, RV				LV	RV
30	Failing	NICM	HFpEF	Male	57	White or Caucasian	45.6	N/A		LA, LV, RV		LA		LV	RV
31	Failing	ICM	NA	Male	58	White or Caucasian	33	N/A		LA, RA, LV, RV		LA	RA	LV	RV

## Sheet: Sample names
id	subject #	heart	sex	age	batch	group
Sample_1	21	LA	M	61	Set_1	healthy
Sample_2	21	LV	M	61	Set_1	healthy
Sample_3	17	LA	M	51	Set_1	healthy
Sample_4	15	LA	M	43	Set_1	healthy
Sample_5	15	LV	M	43	Set_1	healthy
Sample_6	20	LA	M	60	Set_1	healthy
Sample_7	20	LV	M	60	Set_1	healthy
Sample_8	10	LA	F	64	Set_1	healthy
Sample_9	10	LV	F	64	Set_1	healthy
Sample_10	8	LA	F	60	Set_1	healthy
Sample_11	8	LV	F	60	Set_1	healthy
Sample_12	6	LA	F	53	Set_1	healthy
Sample_13	6	LV	F	53	Set_1	healthy
Sample_14	12	LA	M	26	Set_2	healthy
Sample_15	12	RA	M	26	Set_2	healthy
Sample_16	12	LV	M	26	Set_2	healthy
Sample_17	12	RV	M	26	Set_2	healthy
Sample_18	14	LA	M	34	Set_2	healthy
Sample_19	14	RA	M	34	Set_2	healthy
Sample_20	14	LV	M	34	Set_2	healthy
Sample_21	14	RV	M	34	Set_2	healthy
Sample_22	13	LA	M	28	Set_2	healthy
Sample_23	13	RA	M	28	Set_2	healthy
Sample_24	13	LV	M	28	Set_2	healthy
Sample_25	13	RV	M	28	Set_2	healthy
Sample_26	1	LA	F	26	Set_2	healthy
Sample_27	1	RA	F	26	Set_2	healthy
Sample_28	1	LV	F	26	Set_2	healthy
Sample_29	1	RV	F	26	Set_2	healthy
Sample_30	4	LA	F	39	Set_2	healthy
Sample_31	4	RA	F	39	Set_2	healthy
Sample_32	4	LV	F	39	Set_2	healthy
Sample_33	4	RV	F	39	Set_2	healthy
Sample_34	2	LA	F	35	Set_2	healthy
Sample_35	2	RA	F	35	Set_2	healthy
Sample_36	2	LV	F	35	Set_2	healthy
Sample_37	2	RV	F	35	Set_2	healthy
Sample_38	3	LA	F	36	Set_2	healthy
Sample_39	3	RA	F	36	Set_2	healthy
Sample_40	3	LV	F	36	Set_2	healthy
Sample_41	3	RV	F	36	Set_2	healthy
S01_AA25118	7	sSAN	F	56	Set_3	healthy
S02_AA24859	7	iSAN	F	56	Set_3	healthy
S03_AA24845	7	LA	F	56	Set_3	healthy
S04_AA25226	7	LV	F	56	Set_3	healthy
S05_AA23445	7	RA	F	56	Set_3	healthy
S06_AA25184	7	RV	F	56	Set_3	healthy
S07_AA25183	11	sSAN	F	71	Set_3	healthy
S08_AA24916	11	iSAN	F	71	Set_3	healthy
S09_AA24818	11	LA	F	71	Set_3	healthy
S10_AA24850	11	LV	F	71	Set_3	healthy
S11_AA23649	11	RA	F	71	Set_3	healthy
S12_AA25126	11	RV	F	71	Set_3	healthy
S13_AA25128	9	LA	F	60	Set_3	healthy
S14_AA24924	9	LV	F	60	Set_3	healthy
S15_AA24826	9	RA	F	60	Set_3	healthy
S16_AA24950	9	RV	F	60	Set_3	healthy
S17_AA24843	16	LA	M	47	Set_3	healthy
S18_AA23468	16	LV	M	47	Set_3	healthy
S19_AA23842	16	RA	M	47	Set_3	healthy
S20_AA25185	16	RV	M	47	Set_3	healthy
S21_AA23520	18	LA	M	53	Set_3	healthy
S22_AA25013	18	LV	M	53	Set_3	healthy
S23_AA25023	18	RA	M	53	Set_3	healthy
S24_AA24810	18	RV	M	53	Set_3	healthy
S25_AA25152	19	LA	M	57	Set_3	healthy
S26_AA25220	19	LV	M	57	Set_3	healthy
S27_AA24889	19	RA	M	57	Set_3	healthy
S28_AA23554	19	RV	M	57	Set_3	healthy
S29_AA24151	19	LA	M	34	Set_3	healthy
S30_AA24931	5	sSAN	F	46	Set_3	healthy
S31_AA24836	5	iSAN	F	46	Set_3	healthy
S32_AA23964	5	LA	F	46	Set_3	healthy
S33_AA25508	5	LV	F	46	Set_3	healthy
S34_AA23995	5	RA	F	46	Set_3	healthy
S35_AA25021	5	RV	F	46	Set_3	healthy
S36_AA25155	27	LV	M	48	Set_3	failing
S37_AA23724	27	RV	M	48	Set_3	failing
S38_AA25197	27	LA	M	48	Set_3	failing
S39_AA23981	25	LV	M	36	Set_3	failing
S40_AA23841	25	RV	M	36	Set_3	failing
S41_AA24132	25	LA	M	36	Set_3	failing
S42_AA25216	25	RA	M	36	Set_3	failing
S43_AA23481	31	LV	M	58	Set_3	failing
S44_AA23819	31	LA	M	58	Set_3	failing
S45_AA23886	29	LV	M	57	Set_3	failing
S47_AA25383	29	RV	M	57	Set_3	failing
S49_AA25252	28	LV	M	51	Set_3	failing
S50_AA25464	28	RV	M	51	Set_3	failing
S51_AA25514	28	LA	M	51	Set_3	failing
S52_AA24806	28	RA	M	51	Set_3	failing
S53_AA25425	23	LV	F	52	Set_3	failing
S54_AA23885	23	RV	F	52	Set_3	failing
S55_AA24941	23	LA	F	52	Set_3	failing
S56_AA24091	24	LV	F	59	Set_3	failing
S57_AA24899	24	RA	F	59	Set_3	failing
S58_AA24870	24	LA	F	59	Set_3	failing
S59_AA24804	24	RV	F	59	Set_3	failing
S60_AA23372	30	LV	M	57	Set_3	failing
S61_AA25084	30	RV	M	57	Set_3	failing
S62_AA23732	22	LV	F	45	Set_3	failing
S63_AA25314	22	RA	F	45	Set_3	failing
S64_AA24205	22	LA	F	45	Set_3	failing
S65_AA23884	22	RV	F	45	Set_3	failing
S66_AA23994	31	RV	M	58	Set_3	failing
S67_AA24852	31	RA	M	58	Set_3	failing
S68_AA23683	23	RA	F	52	Set_3	failing
S70_AA25002	30	LA	M	57	Set_3	failing
S73_AA23996	26	RA	M	47	Set_3	failing
