# Supplementary material for: The atlas of human cardiac promoters and enhancers reveals an important role for regulatory elements in heart failure
Source: Research Square preprint supplement (doi:10.21203/rs.3.rs-1010746/v1), 2021-10-28
Supplement: Supplementary file 2 [file cef58083ccec8abd357bb90d.xlsx]

## Sheet: Лист1
Phenotype.description	DOID	DO_term	Variant.name	Variant.source	Chromosome.scaffold.name	Chromosome.scaffold.position.start..bp.	Chromosome.scaffold.position.end..bp.	Title	Authors	Year	PubMed.ID	PMC.reference.number..PMCID.	Clinical.significance	Variant.source.description
cardiovascular disease	DOID:1287	cardiovascular system disease	rs1801253	dbSNP	10	114045297	114045297	?-1 and ?-2 adrenergic receptor polymorphism and association with cardiovascular response to orthostatic screening.	Wittwer ED, Liu Z, Warner ND, Schroeder DR, Nadeau AM, Allen AR, Murillo CJ, Elvebak RL, Aakre BM, Eisenach JH.	2011	21807569	PMC3167015	drug response	Variants (including SNPs and indels) imported from dbSNP
cardiovascular disease	DOID:1287	cardiovascular system disease	rs7412	dbSNP	19	44908822	44908822	?-Amyloid accumulation in the human brain after one night of sleep deprivation.	Shokri-Kojori E, Wang GJ, Wiers CE, Demiral SB, Guo M, Kim SW, Lindgren E, Ramirez V, Zehra A, Freeman C, Miller G, Manza P, Srivastava T, De Santi S, Tomasi D, Benveniste H, Volkow ND.	2018	29632177	PMC5924922	pathogenic,drug response,other	Variants (including SNPs and indels) imported from dbSNP
cardiovascular risk factors	DOID:1287	cardiovascular system disease	rs7412	dbSNP	19	44908822	44908822	?-Amyloid accumulation in the human brain after one night of sleep deprivation.	Shokri-Kojori E, Wang GJ, Wiers CE, Demiral SB, Guo M, Kim SW, Lindgren E, Ramirez V, Zehra A, Freeman C, Miller G, Manza P, Srivastava T, De Santi S, Tomasi D, Benveniste H, Volkow ND.	2018	29632177	PMC5924922	pathogenic,drug response,other	Variants (including SNPs and indels) imported from dbSNP
cardiovascular disease	DOID:1287	cardiovascular system disease	rs7412	dbSNP	19	44908822	44908822	?-Amyloid burden in healthy aging: regional distribution and cognitive consequences.	Rodrigue KM, Kennedy KM, Devous MD, Rieck JR, Hebrank AC, Diaz-Arrastia R, Mathews D, Park DC.	2012	22302550	PMC3280058	pathogenic,drug response,other	Variants (including SNPs and indels) imported from dbSNP
cardiovascular risk factors	DOID:1287	cardiovascular system disease	rs7412	dbSNP	19	44908822	44908822	?-Amyloid burden in healthy aging: regional distribution and cognitive consequences.	Rodrigue KM, Kennedy KM, Devous MD, Rieck JR, Hebrank AC, Diaz-Arrastia R, Mathews D, Park DC.	2012	22302550	PMC3280058	pathogenic,drug response,other	Variants (including SNPs and indels) imported from dbSNP
cardiovascular phenotype	DOID:1287	cardiovascular system disease	rs121913625	dbSNP	14	23429005	23429005	?-Myosin heavy chain variant Val606Met causes very mild hypertrophic cardiomyopathy in mice, but exacerbates HCM phenotypes in mice carrying other HCM mutations.	Blankenburg R, Hackert K, Wurster S, Deenen R, Seidman JG, Seidman CE, Lohse MJ, Schmitt JP.	2014	24829265	PMC4086907	uncertain significance,pathogenic	Variants (including SNPs and indels) imported from dbSNP
cardiovascular phenotype	DOID:1287	cardiovascular system disease	rs121913627	dbSNP	14	23427657	23427657	?-Myosin heavy chain variant Val606Met causes very mild hypertrophic cardiomyopathy in mice, but exacerbates HCM phenotypes in mice carrying other HCM mutations.	Blankenburg R, Hackert K, Wurster S, Deenen R, Seidman JG, Seidman CE, Lohse MJ, Schmitt JP.	2014	24829265	PMC4086907	uncertain significance,pathogenic	Variants (including SNPs and indels) imported from dbSNP
familial hypertrophic cardiomyopathy 1	DOID:0080326	familial hypertrophic cardiomyopathy	rs121913625	dbSNP	14	23429005	23429005	?-Myosin heavy chain variant Val606Met causes very mild hypertrophic cardiomyopathy in mice, but exacerbates HCM phenotypes in mice carrying other HCM mutations.	Blankenburg R, Hackert K, Wurster S, Deenen R, Seidman JG, Seidman CE, Lohse MJ, Schmitt JP.	2014	24829265	PMC4086907	uncertain significance,pathogenic	Variants (including SNPs and indels) imported from dbSNP
familial hypertrophic cardiomyopathy 1	DOID:0080326	familial hypertrophic cardiomyopathy	rs121913627	dbSNP	14	23427657	23427657	?-Myosin heavy chain variant Val606Met causes very mild hypertrophic cardiomyopathy in mice, but exacerbates HCM phenotypes in mice carrying other HCM mutations.	Blankenburg R, Hackert K, Wurster S, Deenen R, Seidman JG, Seidman CE, Lohse MJ, Schmitt JP.	2014	24829265	PMC4086907	uncertain significance,pathogenic	Variants (including SNPs and indels) imported from dbSNP
cardiovascular disease	DOID:1287	cardiovascular system disease	rs1801253	dbSNP	10	114045297	114045297	?1-Adrenoreceptor Polymorphisms and Blood Pressure: 49S Variant Increases Plasma Renin But Not Blood Pressure in Hypertensive Patients.	Sandilands AJ, O'Shaughnessy KM.	2019	30753253	PMC6475877	drug response	Variants (including SNPs and indels) imported from dbSNP
cardiovascular disease	DOID:1287	cardiovascular system disease	rs1801253	dbSNP	10	114045297	114045297	?2 adrenergic receptor polymorphisms and nocturnal blood pressure dipping status in the Wisconsin Sleep Cohort Study.	Vardeny O, Peppard PE, Finn LA, Faraco JH, Mignot E, Hla KM.	2011	21414566	PMC3071556	drug response	Variants (including SNPs and indels) imported from dbSNP
cardiovascular disease	DOID:1287	cardiovascular system disease	rs1801253	dbSNP	10	114045297	114045297	?2-Adrenergic Receptor Gene Polymorphisms Are Associated with Cardiovascular Events But not All-Cause Mortality in Coronary Artery Disease Patients: A Meta-Analysis of Prospective Studies.	Li Y, Yuan H, Sun L, Zhou Q, Yang F, Yang Z, Liu D.	2019	30668166	PMC6383583	drug response	Variants (including SNPs and indels) imported from dbSNP
cardiomyopathy restrictive	DOID:0050700	cardiomyopathy	rs267606617	dbSNP	MT	1555	1555	'Progress' renders detrimental an ancient mitochondrial DNA genetic variant.	Pacheu-Grau D, GГіmez-DurГЎn A, LГіpez-Gallardo E, PinГіs T, Andreu AL, LГіpez-PГ©rez MJ, Montoya J, Ruiz-Pesini E.	2011	21828074		pathogenic,drug response	Variants (including SNPs and indels) imported from dbSNP
cardiovascular disease	DOID:1287	cardiovascular system disease	rs1229984	dbSNP	4	99318162	99318162	Gestaltomics: Systems Biology Schemes for the Study of Neuropsychiatric Diseases.	Gutierrez Najera NA, Resendis-Antonio O, Nicolini H.	2017	28536537	PMC5422874	protective	Variants (including SNPs and indels) imported from dbSNP
cardiovascular disease	DOID:1287	cardiovascular system disease	rs9818870	dbSNP	3	138403280	138403280	My parents died of myocardial infarction: is that my destiny?.	Narula N, Rapezzi C, Tavazzi L, Arbustini E.	2012	22391252			Variants (including SNPs and indels) imported from dbSNP
cardiovascular disease	DOID:1287	cardiovascular system disease	rs3184504	dbSNP	12	111446804	111446804	My parents died of myocardial infarction: is that my destiny?.	Narula N, Rapezzi C, Tavazzi L, Arbustini E.	2012	22391252			Variants (including SNPs and indels) imported from dbSNP
cardiovascular disease	DOID:1287	cardiovascular system disease	rs12740374	dbSNP	1	109274968	109274968	(Pro)renin Receptor and LDL Clearance: An Old Player Joins A New Game.	Strong A, Musunuru K.	2016	26838309	PMC4743896	association	Variants (including SNPs and indels) imported from dbSNP
cardiovascular disease	DOID:1287	cardiovascular system disease	rs7412	dbSNP	19	44908822	44908822	10-year follow-up of the Super-Seniors Study: compression of morbidity and genetic factors.	Tindale LC, Salema D, Brooks-Wilson AR.	2019	30819100	PMC6394013	pathogenic,drug response,other	Variants (including SNPs and indels) imported from dbSNP
cardiovascular risk factors	DOID:1287	cardiovascular system disease	rs7412	dbSNP	19	44908822	44908822	10-year follow-up of the Super-Seniors Study: compression of morbidity and genetic factors.	Tindale LC, Salema D, Brooks-Wilson AR.	2019	30819100	PMC6394013	pathogenic,drug response,other	Variants (including SNPs and indels) imported from dbSNP
cardiovascular disease	DOID:1287	cardiovascular system disease	rs3184504	dbSNP	12	111446804	111446804	1000 Genomes-based imputation identifies novel and refined associations for the Wellcome Trust Case Control Consortium phase 1 Data.	Huang J, Ellinghaus D, Franke A, Howie B, Li Y.	2012	22293688	PMC3376268		Variants (including SNPs and indels) imported from dbSNP
cardiovascular phenotype	DOID:1287	cardiovascular system disease	rs1801181	dbSNP	21	43060506	43060506	118 SNPs of folate-related genes and risks of spina bifida and conotruncal heart defects.	Shaw GM, Lu W, Zhu H, Yang W, Briggs FB, Carmichael SL, Barcellos LF, Lammer EJ, Finnell RH.	2009	19493349	PMC2700092	benign	Variants (including SNPs and indels) imported from dbSNP
cardiovascular phenotype	DOID:1287	cardiovascular system disease	rs5742905	dbSNP	21	43063074	43063074	118 SNPs of folate-related genes and risks of spina bifida and conotruncal heart defects.	Shaw GM, Lu W, Zhu H, Yang W, Briggs FB, Carmichael SL, Barcellos LF, Lammer EJ, Finnell RH.	2009	19493349	PMC2700092	pathogenic	Variants (including SNPs and indels) imported from dbSNP
cardiovascular disease	DOID:1287	cardiovascular system disease	rs3184504	dbSNP	12	111446804	111446804	12q24 locus association with type 1 diabetes: SH2B3 or ATXN2?	Auburger G, Gispert S, Lahut S, OmГјr O, Damrath E, Heck M, Ba?ak N.	2014	24936253	PMC4058736		Variants (including SNPs and indels) imported from dbSNP
cardiovascular disease risk factors	DOID:1287	cardiovascular system disease	rs2075650	dbSNP	19	44892362	44892362	12q24 locus association with type 1 diabetes: SH2B3 or ATXN2?	Auburger G, Gispert S, Lahut S, OmГјr O, Damrath E, Heck M, Ba?ak N.	2014	24936253	PMC4058736		Variants (including SNPs and indels) imported from dbSNP
cardiomyopathy	DOID:0050700	cardiomyopathy	rs397516248	dbSNP	14	23415153	23415153	165th ENMC International Workshop: distal myopathies 6-8th February 2009 Naarden, The Netherlands.	Udd B.	2009	19477645		likely pathogenic,pathogenic	Variants (including SNPs and indels) imported from dbSNP
cardio-facio-cutaneous syndrome	DOID:0060233	cardiofaciocutaneous syndrome	rs61764370	dbSNP	12	25207290	25207290	17th Meeting of the Irish Society of Human Genetics, Friday 5th September 2014.: Trinity Centre for Health Sciences, St James's Hospital, Dublin.		2014	NA	PMC4255841	likely benign	Variants (including SNPs and indels) imported from dbSNP
cardio-facio-cutaneous syndrome	DOID:0060233	cardiofaciocutaneous syndrome	rs61764370	dbSNP	12	25207290	25207290	18th Meeting of the Irish Society of Human Genetics, Friday 4th September 2015: Dublin City University.		2015	NA	PMC4642251	likely benign	Variants (including SNPs and indels) imported from dbSNP
atrial fibrillation	DOID:0060224	atrial fibrillation	rs2200733	dbSNP	4	110789013	110789013	2017 HRS/EHRA/ECAS/APHRS/SOLAECE expert consensus statement on catheter and surgical ablation of atrial fibrillation.	Calkins H, Hindricks G, Cappato R, Kim YH, Saad EB, Aguinaga L, Akar JG, Badhwar V, Brugada J, Camm J, Chen PS, Chen SA, Chung MK, Cosedis Nielsen J, Curtis AB, Davies DW, Day JD, d'Avila A, Natasja de Groot NMS, Di Biase L, Duytschaever M, Edgerton JR, E	2018	29016840	PMC5834122		Variants (including SNPs and indels) imported from dbSNP
atrial fibrillation	DOID:0060224	atrial fibrillation	rs2200733	dbSNP	4	110789013	110789013	2017 HRS/EHRA/ECAS/APHRS/SOLAECE expert consensus statement on catheter and surgical ablation of atrial fibrillation.	Calkins H, Hindricks G, Cappato R, Kim YH, Saad EB, Aguinaga L, Akar JG, Badhwar V, Brugada J, Camm J, Chen PS, Chen SA, Chung MK, Nielsen JC, Curtis AB, Davies DW, Day JD, d'Avila A, de Groot NMSN, Di Biase L, Duytschaever M, Edgerton JR, Ellenbogen KA,	2017	28506916	PMC6019327		Variants (including SNPs and indels) imported from dbSNP
atrial fibrillation/atrial flutter	DOID:0050650	familial atrial fibrillation	rs2200733	dbSNP	4	110789013	110789013	2017 HRS/EHRA/ECAS/APHRS/SOLAECE expert consensus statement on catheter and surgical ablation of atrial fibrillation.	Calkins H, Hindricks G, Cappato R, Kim YH, Saad EB, Aguinaga L, Akar JG, Badhwar V, Brugada J, Camm J, Chen PS, Chen SA, Chung MK, Cosedis Nielsen J, Curtis AB, Davies DW, Day JD, d'Avila A, Natasja de Groot NMS, Di Biase L, Duytschaever M, Edgerton JR, E	2018	29016840	PMC5834122		Variants (including SNPs and indels) imported from dbSNP
atrial fibrillation/atrial flutter	DOID:0050650	familial atrial fibrillation	rs2200733	dbSNP	4	110789013	110789013	2017 HRS/EHRA/ECAS/APHRS/SOLAECE expert consensus statement on catheter and surgical ablation of atrial fibrillation.	Calkins H, Hindricks G, Cappato R, Kim YH, Saad EB, Aguinaga L, Akar JG, Badhwar V, Brugada J, Camm J, Chen PS, Chen SA, Chung MK, Nielsen JC, Curtis AB, Davies DW, Day JD, d'Avila A, de Groot NMSN, Di Biase L, Duytschaever M, Edgerton JR, Ellenbogen KA,	2017	28506916	PMC6019327		Variants (including SNPs and indels) imported from dbSNP
cardiovascular phenotype	DOID:1287	cardiovascular system disease	rs1139793	dbSNP	22	19880695	19880695	354 Assessment of an algorithm for prevention of aromatase inhibitor-associated bone loss: two year results	White, K.L.; Yeow, E.; Beith, J.; Lee, C.P.; Broad, A.; Sewak, S.; Abdi, E.; Sambrook, P.N.; Bell, R.	2010	NA		benign	Variants (including SNPs and indels) imported from dbSNP
cardiovascular phenotype	DOID:1287	cardiovascular system disease	rs1139793	dbSNP	22	19880695	19880695	355 Impact of breast cancer treatment on lymphedema and impairment of function &#x2013; A nationwide study of prevalence and associated factors	G&#xe4;rtner, R.; Jensen, M.B.; Kronborg, L.; Ewertz, M.; Kehlet, H.; Kroman, N.	2010	NA		benign	Variants (including SNPs and indels) imported from dbSNP
cardiovascular phenotype	DOID:1287	cardiovascular system disease	rs1139793	dbSNP	22	19880695	19880695	356 Genetic variation in relation to adverse side-effects of radiotherapy &#x2013; focus on the metabolism of reactive oxygen species	Edvardsen, H.; Reinertsen, K.V.; Aln&#xe6;s, G.I. Grenaker; Tsalenko, A.; Alsner, J.; Overgaard, J.; B&#xf8;rresen-Dale, A.L.; Foss&#xe5;, S.D.; Kristensen, V.N.	2010	NA		benign	Variants (including SNPs and indels) imported from dbSNP
cardiovascular disease	DOID:1287	cardiovascular system disease	rs12740374	dbSNP	1	109274968	109274968	3DSNP: a database for linking human noncoding SNPs to their three-dimensional interacting genes.	Lu Y, Quan C, Chen H, Bo X, Zhang C.	2017	27789693	PMC5210526	association	Variants (including SNPs and indels) imported from dbSNP
heart failure	DOID:114	heart disease	rs3094228	dbSNP	6	31462150	31462150	40th Annual Meeting of the European Thyroid Association.	Santisteban P, ЕЅarkovi? M.	2017	NA	PMC5611847		Variants (including SNPs and indels) imported from dbSNP
heart failure	DOID:114	heart disease	rs3094228	dbSNP	CHR_HSCHR6_MHC_COX_CTG1	31449594	31449594	40th Annual Meeting of the European Thyroid Association.	Santisteban P, ЕЅarkovi? M.	2017	NA	PMC5611847		Variants (including SNPs and indels) imported from dbSNP
heart failure	DOID:114	heart disease	rs3094228	dbSNP	CHR_HSCHR6_MHC_SSTO_CTG1	31452864	31452864	40th Annual Meeting of the European Thyroid Association.	Santisteban P, ЕЅarkovi? M.	2017	NA	PMC5611847		Variants (including SNPs and indels) imported from dbSNP
cardiovascular phenotype	DOID:1287	cardiovascular system disease	rs2228048	dbSNP	3	30672350	30672350	41st Annual Meeting of the European Thyroid Association.		2018	NA	PMC6149447	benign	Variants (including SNPs and indels) imported from dbSNP
cardiomyopathy	DOID:0050700	cardiomyopathy	rs28933979	dbSNP	18	31592974	31592974	5-Oxoprolinuria in Heterozygous Patients for 5-Oxoprolinase (OPLAH) Missense Changes.	Calpena E, Casado M, MartГ­nez-Rubio D, Nascimento A, Colomer J, Gargallo E, GarcГ­a-Cazorla A, Palau F, Artuch R, EspinГіs C.	2013	23430506	PMC3575052	pathogenic	Variants (including SNPs and indels) imported from dbSNP
cardiovascular disease	DOID:1287	cardiovascular system disease	rs1229984	dbSNP	4	99318162	99318162	5' UTR polymorphism of dopamine receptor D1 (DRD1) associated with severity and temperament of alcoholism.	Kim DJ, Park BL, Yoon S, Lee HK, Joe KH, Cheon YH, Gwon DH, Cho SN, Lee HW, NamGung S, Shin HD.	2007	17466946		protective	Variants (including SNPs and indels) imported from dbSNP
atrial fibrillation	DOID:0060224	atrial fibrillation	rs242557	dbSNP	17	45942346	45942346	5'-Upstream variants of CRHR1 and MAPT genes associated with age at onset in progressive supranuclear palsy and cortical basal degeneration.	Cruchaga C, Vidal-Taboada JM, Ezquerra M, Lorenzo E, Martinez-Lage P, Blazquez M, Tolosa E, Iberian Atypical Parkinsonism Study Group Researchers, Pastor P.	2009	19022385			Variants (including SNPs and indels) imported from dbSNP
atrial fibrillation	DOID:0060224	atrial fibrillation	rs242557	dbSNP	CHR_HSCHR17_1_CTG5	46155482	46155482	5'-Upstream variants of CRHR1 and MAPT genes associated with age at onset in progressive supranuclear palsy and cortical basal degeneration.	Cruchaga C, Vidal-Taboada JM, Ezquerra M, Lorenzo E, Martinez-Lage P, Blazquez M, Tolosa E, Iberian Atypical Parkinsonism Study Group Researchers, Pastor P.	2009	19022385			Variants (including SNPs and indels) imported from dbSNP
atrial fibrillation	DOID:0060224	atrial fibrillation	rs242557	dbSNP	CHR_HSCHR17_2_CTG5	45953998	45953998	5'-Upstream variants of CRHR1 and MAPT genes associated with age at onset in progressive supranuclear palsy and cortical basal degeneration.	Cruchaga C, Vidal-Taboada JM, Ezquerra M, Lorenzo E, Martinez-Lage P, Blazquez M, Tolosa E, Iberian Atypical Parkinsonism Study Group Researchers, Pastor P.	2009	19022385			Variants (including SNPs and indels) imported from dbSNP
cardiovascular phenotype	DOID:1287	cardiovascular system disease	rs5742905	dbSNP	21	43063074	43063074	575: Results of a genetic association study of genes in folate metabolism and spina bifida	Martinez, Carla A.; Northrup, Hope; Lin, Jone-Ing; Morrison, Alanna; Fletcher, Jack M.; Tyerman, Gayle; Au, Kit Sing	2008	NA		pathogenic	Variants (including SNPs and indels) imported from dbSNP
cardiovascular disease	DOID:1287	cardiovascular system disease	rs7412	dbSNP	19	44908822	44908822	5th Brazilian Congress of Geriatric Neuropsychiatry: September 5-7, 2013 - Centro Fecomercio de Eventos/SГЈo Paulo.		2013	NA	PMC5619206	pathogenic,drug response,other	Variants (including SNPs and indels) imported from dbSNP
cardiovascular risk factors	DOID:1287	cardiovascular system disease	rs7412	dbSNP	19	44908822	44908822	5th Brazilian Congress of Geriatric Neuropsychiatry: September 5-7, 2013 - Centro Fecomercio de Eventos/SГЈo Paulo.		2013	NA	PMC5619206	pathogenic,drug response,other	Variants (including SNPs and indels) imported from dbSNP
cardiovascular phenotype	DOID:1287	cardiovascular system disease	rs6964587	dbSNP	7	92001306	92001306	7q21-rs6964587 and breast cancer risk: an extended case-control study by the Breast Cancer Association Consortium.	Milne RL, Lorenzo-Bermejo J, Burwinkel B, Malats N, Arias JI, Zamora MP, BenГ­tez J, Humphreys MK, GarcГ­a-Closas M, Chanock SJ, Lissowska J, Sherman ME, Mannermaa A, Kataja V, Kosma VM, Nevanlinna H, Heikkinen T, AittomГ¤ki K, Blomqvist C, Anton-Culver H, Z	2011	21931171	PMC3371608	benign,likely benign	Variants (including SNPs and indels) imported from dbSNP
cardiovascular phenotype	DOID:1287	cardiovascular system disease	rs1139793	dbSNP	22	19880695	19880695	851 Genetic variation in relation to adverse side effects of radiotherapy &#x2013; focus on the metabolism of reactive oxygen species	Edvardsen, H.; Reinertsen, K.V.; Grenaker Aln&#xe6;s, G.I.; Nebdal, D.; Alsner, J.; Overgaard, J.; B&#xf8;rresen-Dale, A.L.; Foss&#xe5;, S.D.; Kristensen, V.N.	2010	NA		benign	Variants (including SNPs and indels) imported from dbSNP
cardiovascular phenotype	DOID:1287	cardiovascular system disease	rs1139793	dbSNP	22	19880695	19880695	852 Prediction of response of locally advanced rectal adenocarcinomas to neoadjuvant chemoradiotherapy by microRNA profiling	Svoboda, M.; Slaby, O.; Fabian, P.; Hezova, R.; Hrstka, R.; Kolarova, T.; Vyzula, R.	2010	NA		benign	Variants (including SNPs and indels) imported from dbSNP
cardiovascular phenotype	DOID:1287	cardiovascular system disease	rs1139793	dbSNP	22	19880695	19880695	853 Selective internal radiation therapy of hepatocellular carcinomas using Yttrium-90 microspheres &#x2013; initial clinical experiences	Tan, E.H.; Goh, S.W.; Chow, P.K.; Lim, K.C.; Chia, G.S.; Lim, M.S.; Lai, H.K.	2010	NA		benign	Variants (including SNPs and indels) imported from dbSNP
cardiovascular phenotype	DOID:1287	cardiovascular system disease	rs1139793	dbSNP	22	19880695	19880695	854 The Amyloid Beta Precursor Protein-Binding Protein 1 (APP-BP1) encoding gene is involved in the radiosensitivity of the Human Papillomavirus (HPV)-positive SCC90 oropharyngeal cell line	Jung, A.; Guihard, S.; Altmeyer, A.; Ramolu, L.; Macabre, C.; No&#xeb;l, G.; Abecassis, J.	2010	NA		benign	Variants (including SNPs and indels) imported from dbSNP
cardiovascular disease	DOID:1287	cardiovascular system disease	rs11591147	dbSNP	1	55039974	55039974	A 19-SNP coronary heart disease gene score profile in subjects with type 2 diabetes: the coronary heart disease risk in type 2 diabetes (CoRDia study) study baseline characteristics.	Beaney KE, Ward CE, Bappa DA, McGale N, Davies AK, Hirani SP, Li K, Howard P, Vance DR, Crockard MA, Lamont JV, Newman S, Humphries SE.	2016	27716211	PMC5048451	benign,pathogenic,association	Variants (including SNPs and indels) imported from dbSNP
cardiovascular disease	DOID:1287	cardiovascular system disease	rs9818870	dbSNP	3	138403280	138403280	A 19-SNP coronary heart disease gene score profile in subjects with type 2 diabetes: the coronary heart disease risk in type 2 diabetes (CoRDia study) study baseline characteristics.	Beaney KE, Ward CE, Bappa DA, McGale N, Davies AK, Hirani SP, Li K, Howard P, Vance DR, Crockard MA, Lamont JV, Newman S, Humphries SE.	2016	27716211	PMC5048451		Variants (including SNPs and indels) imported from dbSNP
cardiovascular disease	DOID:1287	cardiovascular system disease	rs7412	dbSNP	19	44908822	44908822	A 19-SNP coronary heart disease gene score profile in subjects with type 2 diabetes: the coronary heart disease risk in type 2 diabetes (CoRDia study) study baseline characteristics.	Beaney KE, Ward CE, Bappa DA, McGale N, Davies AK, Hirani SP, Li K, Howard P, Vance DR, Crockard MA, Lamont JV, Newman S, Humphries SE.	2016	27716211	PMC5048451	pathogenic,drug response,other	Variants (including SNPs and indels) imported from dbSNP
cardiovascular risk factors	DOID:1287	cardiovascular system disease	rs7412	dbSNP	19	44908822	44908822	A 19-SNP coronary heart disease gene score profile in subjects with type 2 diabetes: the coronary heart disease risk in type 2 diabetes (CoRDia study) study baseline characteristics.	Beaney KE, Ward CE, Bappa DA, McGale N, Davies AK, Hirani SP, Li K, Howard P, Vance DR, Crockard MA, Lamont JV, Newman S, Humphries SE.	2016	27716211	PMC5048451	pathogenic,drug response,other	Variants (including SNPs and indels) imported from dbSNP
cardio-facio-cutaneous syndrome	DOID:0060233	cardiofaciocutaneous syndrome	rs61764370	dbSNP	12	25207290	25207290	A 3'-untranslated region KRAS variant and triple-negative breast cancer: a case-control and genetic analysis.	Paranjape T, Heneghan H, Lindner R, Keane FK, Hoffman A, Hollestelle A, Dorairaj J, Geyda K, Pelletier C, Nallur S, Martens JW, Hooning MJ, Kerin M, Zelterman D, Zhu Y, Tuck D, Harris L, Miller N, Slack F, Weidhaas J.	2011	21435948	PMC3488438	likely benign	Variants (including SNPs and indels) imported from dbSNP
cardio-facio-cutaneous syndrome	DOID:0060233	cardiofaciocutaneous syndrome	rs61764370	dbSNP	12	25207290	25207290	A 3'-UTR KRAS-variant is associated with cisplatin resistance in patients with recurrent and/or metastatic head and neck squamous cell carcinoma.	Chung CH, Lee JW, Slebos RJ, Howard JD, Perez J, Kang H, Fertig EJ, Considine M, Gilbert J, Murphy BA, Nallur S, Paranjape T, Jordan RC, Garcia J, Burtness B, Forastiere AA, Weidhaas JB.	2014	25081901	PMC4207729	likely benign	Variants (including SNPs and indels) imported from dbSNP
cardiomyopathy restrictive	DOID:0050700	cardiomyopathy	rs267606617	dbSNP	MT	1555	1555	A biochemical basis for the inherited susceptibility to aminoglycoside ototoxicity.	Guan MX, Fischel-Ghodsian N, Attardi G.	2000	10915767		pathogenic,drug response	Variants (including SNPs and indels) imported from dbSNP
cardiovascular disease	DOID:1287	cardiovascular system disease	rs696	dbSNP	14	35401887	35401887	A Bioinformatics Approach to Prioritize Single Nucleotide Polymorphisms in TLRs Signaling Pathway Genes.	Alipoor B, Ghaedi H, Omrani MD, Bastami M, Meshkani R, Golmohammadi T.	2016	27478803	PMC4947211	benign	Variants (including SNPs and indels) imported from dbSNP
cardiovascular disease	DOID:1287	cardiovascular system disease	rs780093	dbSNP	2	27519736	27519736	A bivariate genome-wide approach to metabolic syndrome: STAMPEED consortium.	Kraja AT, Vaidya D, Pankow JS, Goodarzi MO, Assimes TL, Kullo IJ, Sovio U, Mathias RA, Sun YV, Franceschini N, Absher D, Li G, Zhang Q, Feitosa MF, Glazer NL, Haritunians T, Hartikainen AL, Knowles JW, North KE, Iribarren C, Kral B, Yanek L, O'Reilly PF,	2011	21386085	PMC3064107		Variants (including SNPs and indels) imported from dbSNP
cardiovascular disease risk factors	DOID:1287	cardiovascular system disease	rs10468017	dbSNP	15	58386313	58386313	A bivariate genome-wide approach to metabolic syndrome: STAMPEED consortium.	Kraja AT, Vaidya D, Pankow JS, Goodarzi MO, Assimes TL, Kullo IJ, Sovio U, Mathias RA, Sun YV, Franceschini N, Absher D, Li G, Zhang Q, Feitosa MF, Glazer NL, Haritunians T, Hartikainen AL, Knowles JW, North KE, Iribarren C, Kral B, Yanek L, O'Reilly PF,	2011	21386085	PMC3064107		Variants (including SNPs and indels) imported from dbSNP
cardiovascular disease risk factors	DOID:1287	cardiovascular system disease	rs173539	dbSNP	16	56954132	56954132	A bivariate genome-wide approach to metabolic syndrome: STAMPEED consortium.	Kraja AT, Vaidya D, Pankow JS, Goodarzi MO, Assimes TL, Kullo IJ, Sovio U, Mathias RA, Sun YV, Franceschini N, Absher D, Li G, Zhang Q, Feitosa MF, Glazer NL, Haritunians T, Hartikainen AL, Knowles JW, North KE, Iribarren C, Kral B, Yanek L, O'Reilly PF,	2011	21386085	PMC3064107		Variants (including SNPs and indels) imported from dbSNP
cardiovascular disease risk factors	DOID:1287	cardiovascular system disease	rs1260326	dbSNP	2	27508073	27508073	A bivariate genome-wide approach to metabolic syndrome: STAMPEED consortium.	Kraja AT, Vaidya D, Pankow JS, Goodarzi MO, Assimes TL, Kullo IJ, Sovio U, Mathias RA, Sun YV, Franceschini N, Absher D, Li G, Zhang Q, Feitosa MF, Glazer NL, Haritunians T, Hartikainen AL, Knowles JW, North KE, Iribarren C, Kral B, Yanek L, O'Reilly PF,	2011	21386085	PMC3064107	association	Variants (including SNPs and indels) imported from dbSNP
cardiovascular phenotype	DOID:1287	cardiovascular system disease	rs41276525	dbSNP	3	38613799	38613799	A Brugada syndrome mutation (p.S216L) and its modulation by p.H558R polymorphism: standard and dynamic characterization.	Marangoni S, Di Resta C, Rocchetti M, Barile L, Rizzetto R, Summa A, Severi S, Sommariva E, Pappone C, Ferrari M, Benedetti S, Zaza A.	2011	21705349		uncertain significance,not provided,likely benign	Variants (including SNPs and indels) imported from dbSNP
cardiovascular phenotype	DOID:1287	cardiovascular system disease	rs374528680	dbSNP	12	2686216	2686216	A CACNA1C variant associated with reduced voltage-dependent inactivation, increased CaV1.2 channel window current, and arrhythmogenesis.	Hennessey JA, Boczek NJ, Jiang YH, Miller JD, Patrick W, Pfeiffer R, Sutphin BS, Tester DJ, Barajas-Martinez H, Ackerman MJ, Antzelevitch C, Kanter R, Pitt GS.	2014	25184293	PMC4153713	uncertain significance	Variants (including SNPs and indels) imported from dbSNP
cardiovascular phenotype	DOID:1287	cardiovascular system disease	rs374528680	dbSNP	CHR_HG1815_PATCH	2692188	2692188	A CACNA1C variant associated with reduced voltage-dependent inactivation, increased CaV1.2 channel window current, and arrhythmogenesis.	Hennessey JA, Boczek NJ, Jiang YH, Miller JD, Patrick W, Pfeiffer R, Sutphin BS, Tester DJ, Barajas-Martinez H, Ackerman MJ, Antzelevitch C, Kanter R, Pitt GS.	2014	25184293	PMC4153713	uncertain significance	Variants (including SNPs and indels) imported from dbSNP
heart failure	DOID:114	heart disease	rs892413	dbSNP	8	42759235	42759235	A candidate gene approach identifies the CHRNA5-A3-B4 region as a risk factor for age-dependent nicotine addiction.	Weiss RB, Baker TB, Cannon DS, von Niederhausern A, Dunn DM, Matsunami N, Singh NA, Baird L, Coon H, McMahon WM, Piper ME, Fiore MC, Scholand MB, Connett JE, Kanner RE, Gahring LC, Rogers SW, Hoidal JR, Leppert MF.	2008	18618000	PMC2442220		Variants (including SNPs and indels) imported from dbSNP
cardiovascular disease	DOID:1287	cardiovascular system disease	rs3918226	dbSNP	7	150993088	150993088	A candidate gene association study of 77 polymorphisms in migraine.	SchГјrks M, Kurth T, Buring JE, Zee RY.	2009	19559392	PMC2704575		Variants (including SNPs and indels) imported from dbSNP
cardiovascular phenotype	DOID:1287	cardiovascular system disease	rs5742905	dbSNP	21	43063074	43063074	A candidate gene association study of 77 polymorphisms in migraine.	SchГјrks M, Kurth T, Buring JE, Zee RY.	2009	19559392	PMC2704575	pathogenic	Variants (including SNPs and indels) imported from dbSNP
cardiovascular disease	DOID:1287	cardiovascular system disease	rs1229984	dbSNP	4	99318162	99318162	A candidate gene association study of alcohol consumption in young women.	Agrawal A, Lynskey MT, Todorov AA, Schrage AJ, Littlefield AK, Grant JD, Zhu Q, Nelson EC, Madden PA, Bucholz KK, Sher KJ, Heath AC.	2011	21143251	PMC3239405	protective	Variants (including SNPs and indels) imported from dbSNP
cardiovascular disease	DOID:1287	cardiovascular system disease	rs6271	dbSNP	9	133657152	133657152	A candidate gene association study of alcohol consumption in young women.	Agrawal A, Lynskey MT, Todorov AA, Schrage AJ, Littlefield AK, Grant JD, Zhu Q, Nelson EC, Madden PA, Bucholz KK, Sher KJ, Heath AC.	2011	21143251	PMC3239405	likely benign	Variants (including SNPs and indels) imported from dbSNP
cardiovascular disease risk factors	DOID:1287	cardiovascular system disease	rs1800562	dbSNP	6	26092913	26092913	A candidate gene for hemochromatosis: frequency of the C282Y and H63D mutations.	Jouanolle AM, Fergelot P, Gandon G, Yaouanq J, Le Gall JY, David V.	1997	9341868		uncertain significance,pathogenic,risk factor,association	Variants (including SNPs and indels) imported from dbSNP
cardiovascular phenotype	DOID:1287	cardiovascular system disease	rs179489	dbSNP	11	2570652	2570652	A candidate locus approach identifies a long QT syndrome gene mutation.	Beery TA, Dyment M, Shooner K, Knilans TK, Benson DW.	2003	14531214		not provided,pathogenic	Variants (including SNPs and indels) imported from dbSNP
cardiac arrhythmia	DOID:10273	heart conduction disease	rs121912705	dbSNP	4	113367764	113367764	A cardiac arrhythmia syndrome caused by loss of ankyrin-B function.	Mohler PJ, Splawski I, Napolitano C, Bottelli G, Sharpe L, Timothy K, Priori SG, Keating MT, Bennett V.	2004	15178757	PMC428486	uncertain significance,not provided,likely benign,pathogenic	Variants (including SNPs and indels) imported from dbSNP
cardiac arrhythmia	DOID:10273	heart conduction disease	rs121912706	dbSNP	4	113373306	113373306	A cardiac arrhythmia syndrome caused by loss of ankyrin-B function.	Mohler PJ, Splawski I, Napolitano C, Bottelli G, Sharpe L, Timothy K, Priori SG, Keating MT, Bennett V.	2004	15178757	PMC428486	uncertain significance,not provided,likely benign,pathogenic	Variants (including SNPs and indels) imported from dbSNP
cardiac arrhythmia	DOID:10273	heart conduction disease	rs35530544	dbSNP	4	113367751	113367751	A cardiac arrhythmia syndrome caused by loss of ankyrin-B function.	Mohler PJ, Splawski I, Napolitano C, Bottelli G, Sharpe L, Timothy K, Priori SG, Keating MT, Bennett V.	2004	15178757	PMC428486	benign,likely benign,pathogenic	Variants (including SNPs and indels) imported from dbSNP
cardiac arrhythmia	DOID:10273	heart conduction disease	rs45454496	dbSNP	4	113373381	113373381	A cardiac arrhythmia syndrome caused by loss of ankyrin-B function.	Mohler PJ, Splawski I, Napolitano C, Bottelli G, Sharpe L, Timothy K, Priori SG, Keating MT, Bennett V.	2004	15178757	PMC428486	uncertain significance,not provided,benign,likely benign	Variants (including SNPs and indels) imported from dbSNP
cardiac arrhythmia ankyrin b-related	DOID:10273	heart conduction disease	rs121912705	dbSNP	4	113367764	113367764	A cardiac arrhythmia syndrome caused by loss of ankyrin-B function.	Mohler PJ, Splawski I, Napolitano C, Bottelli G, Sharpe L, Timothy K, Priori SG, Keating MT, Bennett V.	2004	15178757	PMC428486	uncertain significance,not provided,likely benign,pathogenic	Variants (including SNPs and indels) imported from dbSNP
cardiac arrhythmia ankyrin b-related	DOID:10273	heart conduction disease	rs35530544	dbSNP	4	113367751	113367751	A cardiac arrhythmia syndrome caused by loss of ankyrin-B function.	Mohler PJ, Splawski I, Napolitano C, Bottelli G, Sharpe L, Timothy K, Priori SG, Keating MT, Bennett V.	2004	15178757	PMC428486	benign,likely benign,pathogenic	Variants (including SNPs and indels) imported from dbSNP
cardiac arrhythmia ankyrin b-related	DOID:10273	heart conduction disease	rs45454496	dbSNP	4	113373381	113373381	A cardiac arrhythmia syndrome caused by loss of ankyrin-B function.	Mohler PJ, Splawski I, Napolitano C, Bottelli G, Sharpe L, Timothy K, Priori SG, Keating MT, Bennett V.	2004	15178757	PMC428486	uncertain significance,not provided,benign,likely benign	Variants (including SNPs and indels) imported from dbSNP
cardiac arrhythmia ankyrin b-related	DOID:10273	heart conduction disease	rs72544141	dbSNP	4	113348277	113348277	A cardiac arrhythmia syndrome caused by loss of ankyrin-B function.	Mohler PJ, Splawski I, Napolitano C, Bottelli G, Sharpe L, Timothy K, Priori SG, Keating MT, Bennett V.	2004	15178757	PMC428486	uncertain significance,not provided,likely benign,pathogenic	Variants (including SNPs and indels) imported from dbSNP
cardiovascular phenotype	DOID:1287	cardiovascular system disease	rs121912705	dbSNP	4	113367764	113367764	A cardiac arrhythmia syndrome caused by loss of ankyrin-B function.	Mohler PJ, Splawski I, Napolitano C, Bottelli G, Sharpe L, Timothy K, Priori SG, Keating MT, Bennett V.	2004	15178757	PMC428486	uncertain significance,not provided,likely benign,pathogenic	Variants (including SNPs and indels) imported from dbSNP
cardiovascular phenotype	DOID:1287	cardiovascular system disease	rs121912706	dbSNP	4	113373306	113373306	A cardiac arrhythmia syndrome caused by loss of ankyrin-B function.	Mohler PJ, Splawski I, Napolitano C, Bottelli G, Sharpe L, Timothy K, Priori SG, Keating MT, Bennett V.	2004	15178757	PMC428486	uncertain significance,not provided,likely benign,pathogenic	Variants (including SNPs and indels) imported from dbSNP
cardiovascular phenotype	DOID:1287	cardiovascular system disease	rs35530544	dbSNP	4	113367751	113367751	A cardiac arrhythmia syndrome caused by loss of ankyrin-B function.	Mohler PJ, Splawski I, Napolitano C, Bottelli G, Sharpe L, Timothy K, Priori SG, Keating MT, Bennett V.	2004	15178757	PMC428486	benign,likely benign,pathogenic	Variants (including SNPs and indels) imported from dbSNP
cardiovascular phenotype	DOID:1287	cardiovascular system disease	rs45454496	dbSNP	4	113373381	113373381	A cardiac arrhythmia syndrome caused by loss of ankyrin-B function.	Mohler PJ, Splawski I, Napolitano C, Bottelli G, Sharpe L, Timothy K, Priori SG, Keating MT, Bennett V.	2004	15178757	PMC428486	uncertain significance,not provided,benign,likely benign	Variants (including SNPs and indels) imported from dbSNP
cardiovascular phenotype	DOID:1287	cardiovascular system disease	rs72544141	dbSNP	4	113348277	113348277	A cardiac arrhythmia syndrome caused by loss of ankyrin-B function.	Mohler PJ, Splawski I, Napolitano C, Bottelli G, Sharpe L, Timothy K, Priori SG, Keating MT, Bennett V.	2004	15178757	PMC428486	uncertain significance,not provided,likely benign,pathogenic	Variants (including SNPs and indels) imported from dbSNP
atrial fibrillation familial 10	DOID:0050650	familial atrial fibrillation	rs137854618	dbSNP	3	38566426	38566426	A cardiac sodium channel mutation cosegregates with a rare connexin40 genotype in familial atrial standstill.	Groenewegen WA, Firouzi M, Bezzina CR, Vliex S, van Langen IM, Sandkuijl L, Smits JP, Hulsbeek M, Rook MB, Jongsma HJ, Wilde AA.	2003	12522116		pathogenic	Variants (including SNPs and indels) imported from dbSNP
atrial standstill 1 digenic	DOID:10273	heart conduction disease	rs137854618	dbSNP	3	38566426	38566426	A cardiac sodium channel mutation cosegregates with a rare connexin40 genotype in familial atrial standstill.	Groenewegen WA, Firouzi M, Bezzina CR, Vliex S, van Langen IM, Sandkuijl L, Smits JP, Hulsbeek M, Rook MB, Jongsma HJ, Wilde AA.	2003	12522116		pathogenic	Variants (including SNPs and indels) imported from dbSNP
cardiovascular phenotype	DOID:1287	cardiovascular system disease	rs137854618	dbSNP	3	38566426	38566426	A cardiac sodium channel mutation cosegregates with a rare connexin40 genotype in familial atrial standstill.	Groenewegen WA, Firouzi M, Bezzina CR, Vliex S, van Langen IM, Sandkuijl L, Smits JP, Hulsbeek M, Rook MB, Jongsma HJ, Wilde AA.	2003	12522116		pathogenic	Variants (including SNPs and indels) imported from dbSNP
cardio-facio-cutaneous syndrome	DOID:0060233	cardiofaciocutaneous syndrome	rs180177040	dbSNP	7	140754187	140754187	A cardio-facio-cutaneous syndrome case with tight Achilles tendons.	Hazan F, Aykut A, Hizarcioglu M, Tavli V, Onay H, Ozkinay F.	2012	22876591		likely pathogenic,pathogenic	Variants (including SNPs and indels) imported from dbSNP
cardiofaciocutaneous syndrome 1	DOID:0060233	cardiofaciocutaneous syndrome	rs180177040	dbSNP	7	140754187	140754187	A cardio-facio-cutaneous syndrome case with tight Achilles tendons.	Hazan F, Aykut A, Hizarcioglu M, Tavli V, Onay H, Ozkinay F.	2012	22876591		likely pathogenic,pathogenic	Variants (including SNPs and indels) imported from dbSNP
cardiomyopathy	DOID:0050700	cardiomyopathy	rs397516028	dbSNP	11	47332594	47332594	A case of compound mutations in the MYBPC3 gene associated with biventricular hypertrophy and neonatal death.	Marziliano N, Merlini PA, Vignati G, Orsini F, Motta V, Bandiera L, Intrieri M, Veronese S.	2012	22907696		uncertain significance,likely pathogenic	Variants (including SNPs and indels) imported from dbSNP
familial hypertrophic cardiomyopathy 4	DOID:0080326	familial hypertrophic cardiomyopathy	rs397516028	dbSNP	11	47332594	47332594	A case of compound mutations in the MYBPC3 gene associated with biventricular hypertrophy and neonatal death.	Marziliano N, Merlini PA, Vignati G, Orsini F, Motta V, Bandiera L, Intrieri M, Veronese S.	2012	22907696		uncertain significance,likely pathogenic	Variants (including SNPs and indels) imported from dbSNP
cardiomyopathy	DOID:0050700	cardiomyopathy	rs28933979	dbSNP	18	31592974	31592974	A case of familial amyloid polyneuropathy homozygous for the transthyretin Val30Met gene with motor-dominant sensorimotor polyneuropathy and unusual sural nerve pathological findings.	Yoshioka A, Yamaya Y, Saiki S, Hirose G, Shimazaki K, Nakamura M, Ando Y.	2001	11709003		pathogenic	Variants (including SNPs and indels) imported from dbSNP
cardiomyopathy	DOID:0050700	cardiomyopathy	rs148791216	dbSNP	7	151781371	151781371	A case of familial hypertrophic cardiomyopathy emphasizes the importance of parallel screening of multiple disease genes.	Scheffold T, WaldmГјller S, Borisov K.	2011	21409595		likely benign	Variants (including SNPs and indels) imported from dbSNP
cardiovascular phenotype	DOID:1287	cardiovascular system disease	rs148791216	dbSNP	7	151781371	151781371	A case of familial hypertrophic cardiomyopathy emphasizes the importance of parallel screening of multiple disease genes.	Scheffold T, WaldmГјller S, Borisov K.	2011	21409595		likely benign	Variants (including SNPs and indels) imported from dbSNP
cardiovascular phenotype	DOID:1287	cardiovascular system disease	rs41261344	dbSNP	3	38575385	38575385	A case of Long QT syndrome type 3 aggravated by beta-blockers and alleviated by mexiletine: the role of epinephrine provocation test.	Park J, Kim SK, Pak HN.	2013	23364992	PMC3575977	uncertain significance,not provided,benign,pathogenic,risk factor	Variants (including SNPs and indels) imported from dbSNP
cardiovascular phenotype	DOID:1287	cardiovascular system disease	rs56105708	dbSNP	3	30671754	30671754	A catalog of 106 single-nucleotide polymorphisms (SNPs) and 11 other types of variations in genes for transforming growth factor-beta1 (TGF-beta1) and its signaling pathway.	Watanabe Y, Kinoshita A, Yamada T, Ohta T, Kishino T, Matsumoto N, Ishikawa M, Niikawa N, Yoshiura K.	2002	12202987		benign,likely benign	Variants (including SNPs and indels) imported from dbSNP
cardiovascular disease risk factors	DOID:1287	cardiovascular system disease	rs2075650	dbSNP	19	44892362	44892362	A cautionary note on using secondary phenotypes in neuroimaging genetic studies.	Kim J, Pan W, Alzheimer's Disease Neuroimaging Initiative.	2015	26220747	PMC4604049		Variants (including SNPs and indels) imported from dbSNP
cardiovascular phenotype	DOID:1287	cardiovascular system disease	rs234706	dbSNP	21	43065240	43065240	A CBS haplotype and a polymorphism at the MSR gene are associated with cardiovascular disease in a Spanish case-control study.	Urreizti R, Asteggiano C, Vilaseca MA, Corbella E, PintГі X, Grinberg D, Balcells S.	2007	17553479		benign	Variants (including SNPs and indels) imported from dbSNP
cardiovascular phenotype	DOID:1287	cardiovascular system disease	rs1801181	dbSNP	21	43060506	43060506	A CBS haplotype and a polymorphism at the MSR gene are associated with cardiovascular disease in a Spanish case-control study.	Urreizti R, Asteggiano C, Vilaseca MA, Corbella E, PintГі X, Grinberg D, Balcells S.	2007	17553479		benign	Variants (including SNPs and indels) imported from dbSNP
cardiomyopathy	DOID:0050700	cardiomyopathy	rs200352299	dbSNP	11	47341180	47341180	A child cohort study from southern Italy enlarges the genetic spectrum of hypertrophic cardiomyopathy.	Frisso G, Limongelli G, Pacileo G, Del Giudice A, Forgione L, CalabrГІ P, Iacomino M, Detta N, Di Fonzo LM, Maddaloni V, CalabrГІ R, Salvatore F.	2009	19659763		uncertain significance,benign,likely benign	Variants (including SNPs and indels) imported from dbSNP
cardiomyopathy	DOID:0050700	cardiomyopathy	rs397515905	dbSNP	11	47342719	47342719	A child cohort study from southern Italy enlarges the genetic spectrum of hypertrophic cardiomyopathy.	Frisso G, Limongelli G, Pacileo G, Del Giudice A, Forgione L, CalabrГІ P, Iacomino M, Detta N, Di Fonzo LM, Maddaloni V, CalabrГІ R, Salvatore F.	2009	19659763		uncertain significance,likely pathogenic,pathogenic	Variants (including SNPs and indels) imported from dbSNP
cardiomyopathy	DOID:0050700	cardiomyopathy	rs397516233	dbSNP	14	23415832	23415832	A child cohort study from southern Italy enlarges the genetic spectrum of hypertrophic cardiomyopathy.	Frisso G, Limongelli G, Pacileo G, Del Giudice A, Forgione L, CalabrГІ P, Iacomino M, Detta N, Di Fonzo LM, Maddaloni V, CalabrГІ R, Salvatore F.	2009	19659763		uncertain significance,likely pathogenic	Variants (including SNPs and indels) imported from dbSNP
cardiovascular phenotype	DOID:1287	cardiovascular system disease	rs200352299	dbSNP	11	47341180	47341180	A child cohort study from southern Italy enlarges the genetic spectrum of hypertrophic cardiomyopathy.	Frisso G, Limongelli G, Pacileo G, Del Giudice A, Forgione L, CalabrГІ P, Iacomino M, Detta N, Di Fonzo LM, Maddaloni V, CalabrГІ R, Salvatore F.	2009	19659763		uncertain significance,benign,likely benign	Variants (including SNPs and indels) imported from dbSNP
cardiovascular phenotype	DOID:1287	cardiovascular system disease	rs397515905	dbSNP	11	47342719	47342719	A child cohort study from southern Italy enlarges the genetic spectrum of hypertrophic cardiomyopathy.	Frisso G, Limongelli G, Pacileo G, Del Giudice A, Forgione L, CalabrГІ P, Iacomino M, Detta N, Di Fonzo LM, Maddaloni V, CalabrГІ R, Salvatore F.	2009	19659763		uncertain significance,likely pathogenic,pathogenic	Variants (including SNPs and indels) imported from dbSNP
familial hypertrophic cardiomyopathy 1	DOID:0080326	familial hypertrophic cardiomyopathy	rs397515905	dbSNP	11	47342719	47342719	A child cohort study from southern Italy enlarges the genetic spectrum of hypertrophic cardiomyopathy.	Frisso G, Limongelli G, Pacileo G, Del Giudice A, Forgione L, CalabrГІ P, Iacomino M, Detta N, Di Fonzo LM, Maddaloni V, CalabrГІ R, Salvatore F.	2009	19659763		uncertain significance,likely pathogenic,pathogenic	Variants (including SNPs and indels) imported from dbSNP
familial hypertrophic cardiomyopathy 1	DOID:0080326	familial hypertrophic cardiomyopathy	rs397516233	dbSNP	14	23415832	23415832	A child cohort study from southern Italy enlarges the genetic spectrum of hypertrophic cardiomyopathy.	Frisso G, Limongelli G, Pacileo G, Del Giudice A, Forgione L, CalabrГІ P, Iacomino M, Detta N, Di Fonzo LM, Maddaloni V, CalabrГІ R, Salvatore F.	2009	19659763		uncertain significance,likely pathogenic	Variants (including SNPs and indels) imported from dbSNP
familial hypertrophic cardiomyopathy 4	DOID:0080326	familial hypertrophic cardiomyopathy	rs200352299	dbSNP	11	47341180	47341180	A child cohort study from southern Italy enlarges the genetic spectrum of hypertrophic cardiomyopathy.	Frisso G, Limongelli G, Pacileo G, Del Giudice A, Forgione L, CalabrГІ P, Iacomino M, Detta N, Di Fonzo LM, Maddaloni V, CalabrГІ R, Salvatore F.	2009	19659763		uncertain significance,benign,likely benign	Variants (including SNPs and indels) imported from dbSNP
atrial fibrillation	DOID:0060224	atrial fibrillation	rs6843082	dbSNP	4	110796911	110796911	A Chromosome 4q25 Variant is Associated with Atrial Fibrillation Recurrence After Catheter Ablation: A Systematic Review and Meta-Analysis.	Rattanawong P, Chenbhanich J, Vutthikraivit W, Chongsathidkiet P.	2018	29988284	PMC6009792		Variants (including SNPs and indels) imported from dbSNP
atrial fibrillation	DOID:0060224	atrial fibrillation	rs2200733	dbSNP	4	110789013	110789013	A Chromosome 4q25 Variant is Associated with Atrial Fibrillation Recurrence After Catheter Ablation: A Systematic Review and Meta-Analysis.	Rattanawong P, Chenbhanich J, Vutthikraivit W, Chongsathidkiet P.	2018	29988284	PMC6009792		Variants (including SNPs and indels) imported from dbSNP
atrial fibrillation	DOID:0060224	atrial fibrillation	rs13376333	dbSNP	1	154841877	154841877	A Chromosome 4q25 Variant is Associated with Atrial Fibrillation Recurrence After Catheter Ablation: A Systematic Review and Meta-Analysis.	Rattanawong P, Chenbhanich J, Vutthikraivit W, Chongsathidkiet P.	2018	29988284	PMC6009792		Variants (including SNPs and indels) imported from dbSNP
atrial fibrillation	DOID:0060224	atrial fibrillation	rs2106261	dbSNP	16	73017721	73017721	A Chromosome 4q25 Variant is Associated with Atrial Fibrillation Recurrence After Catheter Ablation: A Systematic Review and Meta-Analysis.	Rattanawong P, Chenbhanich J, Vutthikraivit W, Chongsathidkiet P.	2018	29988284	PMC6009792		Variants (including SNPs and indels) imported from dbSNP
atrial fibrillation	DOID:0060224	atrial fibrillation	rs7193343	dbSNP	16	72995261	72995261	A Chromosome 4q25 Variant is Associated with Atrial Fibrillation Recurrence After Catheter Ablation: A Systematic Review and Meta-Analysis.	Rattanawong P, Chenbhanich J, Vutthikraivit W, Chongsathidkiet P.	2018	29988284	PMC6009792		Variants (including SNPs and indels) imported from dbSNP
atrial fibrillation/atrial flutter	DOID:0050650	familial atrial fibrillation	rs2200733	dbSNP	4	110789013	110789013	A Chromosome 4q25 Variant is Associated with Atrial Fibrillation Recurrence After Catheter Ablation: A Systematic Review and Meta-Analysis.	Rattanawong P, Chenbhanich J, Vutthikraivit W, Chongsathidkiet P.	2018	29988284	PMC6009792		Variants (including SNPs and indels) imported from dbSNP
atrial fibrillation/atrial flutter	DOID:0050650	familial atrial fibrillation	rs10033464	dbSNP	4	110799605	110799605	A Chromosome 4q25 Variant is Associated with Atrial Fibrillation Recurrence After Catheter Ablation: A Systematic Review and Meta-Analysis.	Rattanawong P, Chenbhanich J, Vutthikraivit W, Chongsathidkiet P.	2018	29988284	PMC6009792		Variants (including SNPs and indels) imported from dbSNP
cardiomyopathy	DOID:0050700	cardiomyopathy	rs2071225	dbSNP	X	101407913	101407913	A classical phenotype of Anderson-Fabry disease in a female patient with intronic mutations of the GLA gene: a case report.	Pisani A, Imbriaco M, Zizzo C, Albeggiani G, Colomba P, Alessandro R, Iemolo F, Duro G.	2012	22682330	PMC3425126	benign	Variants (including SNPs and indels) imported from dbSNP
cardiovascular disease	DOID:1287	cardiovascular system disease	rs9818870	dbSNP	3	138403280	138403280	A clinical-genetic approach to assessing cardiovascular risk in patients with CKD.	Rodrigo E, Pich S, Subirana I, Fernandez-Fresnedo G, Barreda P, Ferrer-Costa C, M de Francisco ГЃL, Salas E, Elosua R, Arias M.	2017	28979779	PMC5622901		Variants (including SNPs and indels) imported from dbSNP
cardiomyopathy	DOID:0050700	cardiomyopathy	rs72648923	dbSNP	2	178735748	178735748	A Combined Linkage and Exome Sequencing Analysis for Electrocardiogram Parameters in the Erasmus Rucphen Family Study.	Silva CT, Zorkoltseva IV, Amin N, Demirkan A, van Leeuwen EM, Kors JA, van den Berg M, Stricker BH, Uitterlinden AG, Kirichenko AV, Witteman JC, Willemsen R, Oostra BA, Axenovich TI, van Duijn CM, Isaacs A.	2016	27877193	PMC5099142	uncertain significance,benign,likely benign	Variants (including SNPs and indels) imported from dbSNP
cardiovascular phenotype	DOID:1287	cardiovascular system disease	rs72648923	dbSNP	2	178735748	178735748	A Combined Linkage and Exome Sequencing Analysis for Electrocardiogram Parameters in the Erasmus Rucphen Family Study.	Silva CT, Zorkoltseva IV, Amin N, Demirkan A, van Leeuwen EM, Kors JA, van den Berg M, Stricker BH, Uitterlinden AG, Kirichenko AV, Witteman JC, Willemsen R, Oostra BA, Axenovich TI, van Duijn CM, Isaacs A.	2016	27877193	PMC5099142	uncertain significance,benign,likely benign	Variants (including SNPs and indels) imported from dbSNP
cardiovascular phenotype	DOID:1287	cardiovascular system disease	rs199472921	dbSNP	7	150951712	150951712	A common antitussive drug, clobutinol, precipitates the long QT syndrome 2.	Bellocq C, Wilders R, Schott JJ, LouГ©rat-Oriou B, Boisseau P, Le Marec H, Escande D, BarГі I.	2004	15280442		not provided,pathogenic	Variants (including SNPs and indels) imported from dbSNP
cardiovascular disease	DOID:1287	cardiovascular system disease	rs7412	dbSNP	19	44908822	44908822	A Common APOE Polymorphism Is an Independent Risk Factor for Reduced Glomerular Filtration Rate in the Spanish RENASTUR Cohort.	Coto E, GГіmez J, Tavira B, Tranche S, Ortega F, RodrГ­guez MI, SГЎnchez E, MarГ­n R, Corao AI, Arenas J, Alvarez V.	2013	23922551	PMC3721126	pathogenic,drug response,other	Variants (including SNPs and indels) imported from dbSNP
cardiovascular risk factors	DOID:1287	cardiovascular system disease	rs7412	dbSNP	19	44908822	44908822	A Common APOE Polymorphism Is an Independent Risk Factor for Reduced Glomerular Filtration Rate in the Spanish RENASTUR Cohort.	Coto E, GГіmez J, Tavira B, Tranche S, Ortega F, RodrГ­guez MI, SГЎnchez E, MarГ­n R, Corao AI, Arenas J, Alvarez V.	2013	23922551	PMC3721126	pathogenic,drug response,other	Variants (including SNPs and indels) imported from dbSNP
cardiac arrhythmia	DOID:10273	heart conduction disease	rs7626962	dbSNP	3	38579416	38579416	A common cardiac sodium channel variant associated with sudden infant death in African Americans, SCN5A S1103Y.	Plant LD, Bowers PN, Liu Q, Morgan T, Zhang T, State MW, Chen W, Kittles RA, Goldstein SA.	2006	16453024	PMC1359045	benign,likely benign,pathogenic,risk factor	Variants (including SNPs and indels) imported from dbSNP
cardiovascular phenotype	DOID:1287	cardiovascular system disease	rs7626962	dbSNP	3	38579416	38579416	A common cardiac sodium channel variant associated with sudden infant death in African Americans, SCN5A S1103Y.	Plant LD, Bowers PN, Liu Q, Morgan T, Zhang T, State MW, Chen W, Kittles RA, Goldstein SA.	2006	16453024	PMC1359045	benign,likely benign,pathogenic,risk factor	Variants (including SNPs and indels) imported from dbSNP
cardiovascular phenotype	DOID:1287	cardiovascular system disease	rs41313691	dbSNP	3	38604031	38604031	A common cardiac sodium channel variant associated with sudden infant death in African Americans, SCN5A S1103Y.	Plant LD, Bowers PN, Liu Q, Morgan T, Zhang T, State MW, Chen W, Kittles RA, Goldstein SA.	2006	16453024	PMC1359045	benign,likely benign	Variants (including SNPs and indels) imported from dbSNP
atrial fibrillation	DOID:0060224	atrial fibrillation	rs10465885	dbSNP	1	147760632	147760632	A common connexin-40 gene promoter variant affects connexin-40 expression in human atria and is associated with atrial fibrillation.	Wirka RC, Gore S, Van Wagoner DR, Arking DE, Lubitz SA, Lunetta KL, Benjamin EJ, Alonso A, Ellinor PT, Barnard J, Chung MK, Smith JD.	2011	21076161	PMC3057452		Variants (including SNPs and indels) imported from dbSNP
cardiovascular phenotype	DOID:1287	cardiovascular system disease	rs9840993	dbSNP	3	123739046	123739046	A common cortactin gene variation confers differential susceptibility to severe asthma.	Ma SF, Flores C, Wade MS, Dudek SM, Nicolae DL, Ober C, Garcia JG.	2008	18521921	PMC3774307	benign,likely benign	Variants (including SNPs and indels) imported from dbSNP
cardiovascular disease risk factors	DOID:1287	cardiovascular system disease	rs1260326	dbSNP	2	27508073	27508073	A Common Gene Variant in Glucokinase Regulatory Protein Interacts With Glucose Metabolism on Diabetic Dyslipidemia: the Combined CODAM and Hoorn Studies.	Simons N, Dekker JM, van Greevenbroek MM, Nijpels G, 't Hart LM, van der Kallen CJ, Schalkwijk CG, Schaper NC, Stehouwer CD, Brouwers MC.	2016	27660121		association	Variants (including SNPs and indels) imported from dbSNP
heart rate response to recovery post exercise	DOID:10273	heart conduction disease	rs6795970	dbSNP	3	38725184	38725184	A common genetic variant within SCN10A modulates cardiac SCN5A expression.	van den Boogaard M, Smemo S, Burnicka-Turek O, Arnolds DE, van de Werken HJ, Klous P, McKean D, Muehlschlegel JD, Moosmann J, Toka O, Yang XH, Koopmann TT, Adriaens ME, Bezzina CR, de Laat W, Seidman C, Seidman JG, Christoffels VM, Nobrega MA, Barnett P,	2014	24642470	PMC3973109	benign	Variants (including SNPs and indels) imported from dbSNP
cardiomyopathy	DOID:0050700	cardiomyopathy	rs45550635	dbSNP	11	19192439	19192439	A common MLP (muscle LIM protein) variant is associated with cardiomyopathy.	KnГ¶ll R, Kostin S, Klede S, Savvatis K, Klinge L, Stehle I, Gunkel S, KГ¶tter S, Babicz K, Sohns M, Miocic S, DidiГ© M, KnГ¶ll G, Zimmermann WH, Thelen P, BickebГ¶ller H, Maier LS, Schaper W, Schaper J, Kraft T, TschГ¶pe C, Linke WA, Chien KR.	2010	20044516		uncertain significance,benign,likely benign	Variants (including SNPs and indels) imported from dbSNP
cardiovascular phenotype	DOID:1287	cardiovascular system disease	rs45550635	dbSNP	11	19192439	19192439	A common MLP (muscle LIM protein) variant is associated with cardiomyopathy.	KnГ¶ll R, Kostin S, Klede S, Savvatis K, Klinge L, Stehle I, Gunkel S, KГ¶tter S, Babicz K, Sohns M, Miocic S, DidiГ© M, KnГ¶ll G, Zimmermann WH, Thelen P, BickebГ¶ller H, Maier LS, Schaper W, Schaper J, Kraft T, TschГ¶pe C, Linke WA, Chien KR.	2010	20044516		uncertain significance,benign,likely benign	Variants (including SNPs and indels) imported from dbSNP
familial hypertrophic cardiomyopathy 12	DOID:0080326	familial hypertrophic cardiomyopathy	rs45550635	dbSNP	11	19192439	19192439	A common MLP (muscle LIM protein) variant is associated with cardiomyopathy.	KnГ¶ll R, Kostin S, Klede S, Savvatis K, Klinge L, Stehle I, Gunkel S, KГ¶tter S, Babicz K, Sohns M, Miocic S, DidiГ© M, KnГ¶ll G, Zimmermann WH, Thelen P, BickebГ¶ller H, Maier LS, Schaper W, Schaper J, Kraft T, TschГ¶pe C, Linke WA, Chien KR.	2010	20044516		uncertain significance,benign,likely benign	Variants (including SNPs and indels) imported from dbSNP
cardiomyopathy familial hypertrophic 4 susceptibility to	DOID:0050700	cardiomyopathy	rs397514444	dbSNP	11	47332268	47332292	A common MYBPC3 (cardiac myosin binding protein C) variant associated with cardiomyopathies in South Asia.	Dhandapany PS, Sadayappan S, Xue Y, Powell GT, Rani DS, Nallari P, Rai TS, Khullar M, Soares P, Bahl A, Tharkan JM, Vaideeswar P, Rathinavel A, Narasimhan C, Ayapati DR, Ayub Q, Mehdi SQ, Oppenheimer S, Richards MB, Price AL, Patterson N, Reich D, Singh L	2009	19151713	PMC2697598	risk factor	Variants (including SNPs and indels) imported from dbSNP
cardiac arrhythmia	DOID:10273	heart conduction disease	rs74315447	dbSNP	21	34370639	34370639	A common polymorphism associated with antibiotic-induced cardiac arrhythmia.	Sesti F, Abbott GW, Wei J, Murray KT, Saksena S, Schwartz PJ, Priori SG, Roden DM, George AL, Goldstein SA.	2000	10984545	PMC27073	uncertain significance,not provided,likely pathogenic	Variants (including SNPs and indels) imported from dbSNP
cardiac arrhythmia	DOID:10273	heart conduction disease	rs74315448	dbSNP	21	34370648	34370648	A common polymorphism associated with antibiotic-induced cardiac arrhythmia.	Sesti F, Abbott GW, Wei J, Murray KT, Saksena S, Schwartz PJ, Priori SG, Roden DM, George AL, Goldstein SA.	2000	10984545	PMC27073	uncertain significance,likely benign	Variants (including SNPs and indels) imported from dbSNP
cardiovascular phenotype	DOID:1287	cardiovascular system disease	rs2234916	dbSNP	21	34370500	34370500	A common polymorphism associated with antibiotic-induced cardiac arrhythmia.	Sesti F, Abbott GW, Wei J, Murray KT, Saksena S, Schwartz PJ, Priori SG, Roden DM, George AL, Goldstein SA.	2000	10984545	PMC27073	not provided,benign	Variants (including SNPs and indels) imported from dbSNP
cardiovascular phenotype	DOID:1287	cardiovascular system disease	rs74315448	dbSNP	21	34370648	34370648	A common polymorphism associated with antibiotic-induced cardiac arrhythmia.	Sesti F, Abbott GW, Wei J, Murray KT, Saksena S, Schwartz PJ, Priori SG, Roden DM, George AL, Goldstein SA.	2000	10984545	PMC27073	uncertain significance,likely benign	Variants (including SNPs and indels) imported from dbSNP
atrial fibrillation	DOID:0060224	atrial fibrillation	rs1805123	dbSNP	7	150948446	150948446	A common polymorphism in KCNH2 (HERG) hastens cardiac repolarization.	Bezzina CR, Verkerk AO, Busjahn A, Jeron A, Erdmann J, Koopmann TT, Bhuiyan ZA, Wilders R, Mannens MM, Tan HL, Luft FC, Schunkert H, Wilde AA.	2003	12829173		uncertain significance,benign,likely benign	Variants (including SNPs and indels) imported from dbSNP
cardiovascular phenotype	DOID:1287	cardiovascular system disease	rs1805123	dbSNP	7	150948446	150948446	A common polymorphism in KCNH2 (HERG) hastens cardiac repolarization.	Bezzina CR, Verkerk AO, Busjahn A, Jeron A, Erdmann J, Koopmann TT, Bhuiyan ZA, Wilders R, Mannens MM, Tan HL, Luft FC, Schunkert H, Wilde AA.	2003	12829173		uncertain significance,benign,likely benign	Variants (including SNPs and indels) imported from dbSNP
cardiovascular phenotype	DOID:1287	cardiovascular system disease	rs1805124	dbSNP	3	38603929	38603929	A common polymorphism in the SCN5A gene is associated with dilated cardiomyopathy.	Mazzaccara C, Limongelli G, Petretta M, Vastarella R, Pacileo G, Bonaduce D, Salvatore F, Frisso G.	2018	29782370	PMC6012048	benign,likely benign,pathogenic	Variants (including SNPs and indels) imported from dbSNP
cardiovascular phenotype	DOID:1287	cardiovascular system disease	rs41261344	dbSNP	3	38575385	38575385	A common SCN5A polymorphism attenuates a severe cardiac phenotype caused by a nonsense SCN5A mutation in a Chinese family with an inherited cardiac conduction defect.	Niu DM, Hwang B, Hwang HW, Wang NH, Wu JY, Lee PC, Chien JC, Shieh RC, Chen YT.	2006	16707561	PMC2563172	uncertain significance,not provided,benign,pathogenic,risk factor	Variants (including SNPs and indels) imported from dbSNP
atrial fibrillation	DOID:0060224	atrial fibrillation	rs41315493	dbSNP	3	38550521	38550521	A common SCN5A polymorphism modulates the biophysical defects of SCN5A mutations.	Shinlapawittayatorn K, Du XX, Liu H, Ficker E, Kaufman ES, DeschГЄnes I.	2011	21109022	PMC3050092	uncertain significance,not provided,benign,likely benign,likely pathogenic	Variants (including SNPs and indels) imported from dbSNP
cardiovascular phenotype	DOID:1287	cardiovascular system disease	rs41315493	dbSNP	3	38550521	38550521	A common SCN5A polymorphism modulates the biophysical defects of SCN5A mutations.	Shinlapawittayatorn K, Du XX, Liu H, Ficker E, Kaufman ES, DeschГЄnes I.	2011	21109022	PMC3050092	uncertain significance,not provided,benign,likely benign,likely pathogenic	Variants (including SNPs and indels) imported from dbSNP
cardiovascular phenotype	DOID:1287	cardiovascular system disease	rs45489199	dbSNP	3	38550356	38550356	A common SCN5A polymorphism modulates the biophysical defects of SCN5A mutations.	Shinlapawittayatorn K, Du XX, Liu H, Ficker E, Kaufman ES, DeschГЄnes I.	2011	21109022	PMC3050092	uncertain significance,likely benign	Variants (including SNPs and indels) imported from dbSNP
cardiac conduction defect nonspecific	DOID:10273	heart conduction disease	rs199473118	dbSNP	3	38604067	38604067	A common SCN5A polymorphism modulates the biophysical effects of an SCN5A mutation.	Viswanathan PC, Benson DW, Balser JR.	2003	12569159	PMC151865	uncertain significance,not provided,pathogenic	Variants (including SNPs and indels) imported from dbSNP
cardiovascular phenotype	DOID:1287	cardiovascular system disease	rs1805124	dbSNP	3	38603929	38603929	A common SCN5A polymorphism modulates the biophysical effects of an SCN5A mutation.	Viswanathan PC, Benson DW, Balser JR.	2003	12569159	PMC151865	benign,likely benign,pathogenic	Variants (including SNPs and indels) imported from dbSNP
cardiac arrhythmia	DOID:10273	heart conduction disease	rs7626962	dbSNP	3	38579416	38579416	A common SCN5A variant is associated with PR interval and atrial fibrillation among African Americans.	Ilkhanoff L, Arking DE, Lemaitre RN, Alonso A, Chen LY, Durda P, Hesselson SE, Kerr KF, Magnani JW, Marcus GM, Schnabel RB, Smith JG, Soliman EZ, Reiner AP, Sotoodehnia N, Candidate-Gene Association Resource (CARE) Consortium and the Cardiac Arrest Blood	2014	25065297	PMC4454499	benign,likely benign,pathogenic,risk factor	Variants (including SNPs and indels) imported from dbSNP
cardiovascular phenotype	DOID:1287	cardiovascular system disease	rs7626962	dbSNP	3	38579416	38579416	A common SCN5A variant is associated with PR interval and atrial fibrillation among African Americans.	Ilkhanoff L, Arking DE, Lemaitre RN, Alonso A, Chen LY, Durda P, Hesselson SE, Kerr KF, Magnani JW, Marcus GM, Schnabel RB, Smith JG, Soliman EZ, Reiner AP, Sotoodehnia N, Candidate-Gene Association Resource (CARE) Consortium and the Cardiac Arrest Blood	2014	25065297	PMC4454499	benign,likely benign,pathogenic,risk factor	Variants (including SNPs and indels) imported from dbSNP
cardiovascular phenotype	DOID:1287	cardiovascular system disease	rs1805126	dbSNP	3	38550915	38550915	A common variant alters SCN5A-miR-24 interaction and associates with heart failure mortality.	Zhang X, Yoon JY, Morley M, McLendon JM, Mapuskar KA, Gutmann R, Mehdi H, Bloom HL, Dudley SC, Ellinor PT, Shalaby AA, Weiss R, Tang WHW, Moravec CS, Singh M, Taylor AL, Yancy CW, Feldman AM, McNamara DM, Irani K, Spitz DR, Breheny P, Margulies KB, London	2018	29457789	PMC5824852	benign,likely benign	Variants (including SNPs and indels) imported from dbSNP
heart rate response to recovery post exercise	DOID:10273	heart conduction disease	rs6795970	dbSNP	3	38725184	38725184	A Common Variant in SCN5A and the Risk of Ventricular Fibrillation Caused by First ST-Segment Elevation Myocardial Infarction.	Jabbari R, Glinge C, Jabbari J, Risgaard B, Winkel BG, Terkelsen CJ, Tilsted HH, Jensen LO, Hougaard M, HaunsГё S, EngstrГёm T, Albert CM, Tfelt-Hansen J.	2017	28085969	PMC5234807	benign	Variants (including SNPs and indels) imported from dbSNP
cardiac repolarization	DOID:10273	heart conduction disease	rs7219669	dbSNP	17	70525720	70525720	A common variant near the KCNJ2 gene is associated with T-peak to T-end interval.	Marjamaa A, Oikarinen L, Porthan K, Ripatti S, Peloso G, Noseworthy PA, Viitasalo M, Nieminen MS, Toivonen L, Kontula K, Peltonen L, Havulinna AS, Jula A, O'Donnell CJ, Newton-Cheh C, Perola M, Salomaa V.	2012	22342860	PMC3690340		Variants (including SNPs and indels) imported from dbSNP
heart rate	DOID:10273	heart conduction disease	rs12143842	dbSNP	1	162064100	162064100	A common variant of NOS1AP is associated with QT interval duration in a Chinese population with Type 2 diabetes.	Lu J, Hu C, Hu W, Zhang R, Wang C, Qin W, Yu W, Xiang K, International Type 2 Diabetes 1q Consortium, Jia W.	2010	20722683	PMC2925320		Variants (including SNPs and indels) imported from dbSNP
atrial fibrillation	DOID:0060224	atrial fibrillation	rs762624	dbSNP	6	36677811	36677811	A common variant of the p16(INK4a) genetic region is associated with physical function in older people.	Melzer D, Frayling TM, Murray A, Hurst AJ, Harries LW, Song H, Khaw K, Luben R, Surtees PG, Bandinelli SS, Corsi AM, Ferrucci L, Guralnik JM, Wallace RB, Hattersley AT, Pharoah PD.	2007	17459456	PMC2074888		Variants (including SNPs and indels) imported from dbSNP
atrial fibrillation	DOID:0060224	atrial fibrillation	rs2200733	dbSNP	4	110789013	110789013	A common variant on chromosome 4q25 is associated with prolonged PR interval in subjects with and without atrial fibrillation.	Kolek MJ, Parvez B, Muhammad R, Shoemaker MB, Blair MA, Stubblefield T, Kucera GA, Denny JC, Roden DM, Darbar D.	2014	24161141	PMC3947341		Variants (including SNPs and indels) imported from dbSNP
atrial fibrillation/atrial flutter	DOID:0050650	familial atrial fibrillation	rs2200733	dbSNP	4	110789013	110789013	A common variant on chromosome 4q25 is associated with prolonged PR interval in subjects with and without atrial fibrillation.	Kolek MJ, Parvez B, Muhammad R, Shoemaker MB, Blair MA, Stubblefield T, Kucera GA, Denny JC, Roden DM, Darbar D.	2014	24161141	PMC3947341		Variants (including SNPs and indels) imported from dbSNP
atrial fibrillation	DOID:0060224	atrial fibrillation	rs3807989	dbSNP	7	116546187	116546187	A Common Variation in the Caveolin 1 Gene Is Associated with High Serum Triglycerides and Metabolic Syndrome in an Admixed Latin American Population.	Mora-GarcГ­a G, GГіmez-Camargo D, Alario ГЃ, GГіmez-AlegrГ­a C.	2018	29762069	PMC6211369		Variants (including SNPs and indels) imported from dbSNP
atrial fibrillation	DOID:0060224	atrial fibrillation	rs11773845	dbSNP	7	116551247	116551247	A Common Variation in the Caveolin 1 Gene Is Associated with High Serum Triglycerides and Metabolic Syndrome in an Admixed Latin American Population.	Mora-GarcГ­a G, GГіmez-Camargo D, Alario ГЃ, GГіmez-AlegrГ­a C.	2018	29762069	PMC6211369		Variants (including SNPs and indels) imported from dbSNP
cardiovascular disease risk factors	DOID:1287	cardiovascular system disease	rs6511720	dbSNP	19	11091630	11091630	A comparison of approaches to account for uncertainty in analysis of imputed genotypes.	Zheng J, Li Y, Abecasis GR, Scheet P.	2011	21254217	PMC3143715	benign	Variants (including SNPs and indels) imported from dbSNP
cardiovascular disease risk factors	DOID:1287	cardiovascular system disease	rs2075650	dbSNP	19	44892362	44892362	A comparison of Cox and logistic regression for use in genome-wide association studies of cohort and case-cohort design.	Staley JR, Jones E, Kaptoge S, Butterworth AS, Sweeting MJ, Wood AM, Howson JMM.	2017	28594416	PMC5520083		Variants (including SNPs and indels) imported from dbSNP
cardiovascular disease	DOID:1287	cardiovascular system disease	rs1229984	dbSNP	4	99318162	99318162	A comparison of Val81Met and other polymorphisms of alcohol metabolising genes in patients and controls in Northern Spain.	Celorrio D, Bujanda L, Caso C, Landabaso M, Oria JC, Ogando J, de Pancorbo MM.	2012	22560290		protective	Variants (including SNPs and indels) imported from dbSNP
cardiovascular disease	DOID:1287	cardiovascular system disease	rs1229984	dbSNP	4	99318162	99318162	A compendium of genome-wide associations for cancer: critical synopsis and reappraisal.	Ioannidis JP, Castaldi P, Evangelou E.	2010	20505153	PMC2886095	protective	Variants (including SNPs and indels) imported from dbSNP
atrial fibrillation	DOID:0060224	atrial fibrillation	rs2106261	dbSNP	16	73017721	73017721	A complex insertion/deletion polymorphism in the compositionally biased region of the ZFHX3 gene in patients with coronary heart disease in a Chinese population.	Sun S, Zhang W, Chen X, Peng Y, Chen Q.	2015	26221345	PMC4509290		Variants (including SNPs and indels) imported from dbSNP
atrial fibrillation	DOID:0060224	atrial fibrillation	rs7193343	dbSNP	16	72995261	72995261	A complex insertion/deletion polymorphism in the compositionally biased region of the ZFHX3 gene in patients with coronary heart disease in a Chinese population.	Sun S, Zhang W, Chen X, Peng Y, Chen Q.	2015	26221345	PMC4509290		Variants (including SNPs and indels) imported from dbSNP
cardiovascular disease	DOID:1287	cardiovascular system disease	rs7412	dbSNP	19	44908822	44908822	A composite scoring of genotypes discriminates coronary heart disease risk beyond conventional risk factors in the Boston Puerto Rican Health Study.	Junyent M, Tucker KL, Shen J, Lee YC, Smith CE, Mattei J, Lai CQ, Parnell LD, Ordovas JM.	2010	19501493	PMC4031647	pathogenic,drug response,other	Variants (including SNPs and indels) imported from dbSNP
cardiovascular risk factors	DOID:1287	cardiovascular system disease	rs7412	dbSNP	19	44908822	44908822	A composite scoring of genotypes discriminates coronary heart disease risk beyond conventional risk factors in the Boston Puerto Rican Health Study.	Junyent M, Tucker KL, Shen J, Lee YC, Smith CE, Mattei J, Lai CQ, Parnell LD, Ordovas JM.	2010	19501493	PMC4031647	pathogenic,drug response,other	Variants (including SNPs and indels) imported from dbSNP
cardiovascular disease	DOID:1287	cardiovascular system disease	rs11591147	dbSNP	1	55039974	55039974	A comprehensive 1,000 Genomes-based genome-wide association meta-analysis of coronary artery disease.	Nikpay M, Goel A, Won HH, Hall LM, Willenborg C, Kanoni S, Saleheen D, Kyriakou T, Nelson CP, Hopewell JC, Webb TR, Zeng L, Dehghan A, Alver M, Armasu SM, Auro K, Bjonnes A, Chasman DI, Chen S, Ford I, Franceschini N, Gieger C, Grace C, Gustafsson S, Huan	2015	26343387	PMC4589895	benign,pathogenic,association	Variants (including SNPs and indels) imported from dbSNP
cardiovascular disease	DOID:1287	cardiovascular system disease	rs3918226	dbSNP	7	150993088	150993088	A comprehensive 1,000 Genomes-based genome-wide association meta-analysis of coronary artery disease.	Nikpay M, Goel A, Won HH, Hall LM, Willenborg C, Kanoni S, Saleheen D, Kyriakou T, Nelson CP, Hopewell JC, Webb TR, Zeng L, Dehghan A, Alver M, Armasu SM, Auro K, Bjonnes A, Chasman DI, Chen S, Ford I, Franceschini N, Gieger C, Grace C, Gustafsson S, Huan	2015	26343387	PMC4589895		Variants (including SNPs and indels) imported from dbSNP
cardiovascular disease	DOID:1287	cardiovascular system disease	rs7412	dbSNP	19	44908822	44908822	A comprehensive 1,000 Genomes-based genome-wide association meta-analysis of coronary artery disease.	Nikpay M, Goel A, Won HH, Hall LM, Willenborg C, Kanoni S, Saleheen D, Kyriakou T, Nelson CP, Hopewell JC, Webb TR, Zeng L, Dehghan A, Alver M, Armasu SM, Auro K, Bjonnes A, Chasman DI, Chen S, Ford I, Franceschini N, Gieger C, Grace C, Gustafsson S, Huan	2015	26343387	PMC4589895	pathogenic,drug response,other	Variants (including SNPs and indels) imported from dbSNP
cardiovascular risk factors	DOID:1287	cardiovascular system disease	rs7412	dbSNP	19	44908822	44908822	A comprehensive 1,000 Genomes-based genome-wide association meta-analysis of coronary artery disease.	Nikpay M, Goel A, Won HH, Hall LM, Willenborg C, Kanoni S, Saleheen D, Kyriakou T, Nelson CP, Hopewell JC, Webb TR, Zeng L, Dehghan A, Alver M, Armasu SM, Auro K, Bjonnes A, Chasman DI, Chen S, Ford I, Franceschini N, Gieger C, Grace C, Gustafsson S, Huan	2015	26343387	PMC4589895	pathogenic,drug response,other	Variants (including SNPs and indels) imported from dbSNP
heart rate	DOID:10273	heart conduction disease	rs1951758	dbSNP	14	27067046	27067046	A comprehensive analysis of adiponectin QTLs using SNP association, SNP cis-effects on peripheral blood gene expression and gene expression correlation identified novel metabolic syndrome (MetS) genes with potential role in carcinogenesis and systemic inf	Zhang Y, Kent JW, Olivier M, Ali O, Cerjak D, Broeckel U, Abdou RM, Dyer TD, Comuzzie A, Curran JE, Carless MA, Rainwater DL, GГ¶ring HH, Blangero J, Kissebah AH.	2013	23628382	PMC3643849		Variants (including SNPs and indels) imported from dbSNP
cardiovascular disease risk factors	DOID:1287	cardiovascular system disease	rs2075650	dbSNP	19	44892362	44892362	A comprehensive genetic association study of Alzheimer disease in African Americans.	Logue MW, Schu M, Vardarajan BN, Buros J, Green RC, Go RC, Griffith P, Obisesan TO, Shatz R, Borenstein A, Cupples LA, Lunetta KL, Fallin MD, Baldwin CT, Farrer LA, Multi-Institutional Research on Alzheimer Genetic Epidemiology (MIRAGE) Study Group.	2011	22159054	PMC3356921		Variants (including SNPs and indels) imported from dbSNP
heart failure	DOID:114	heart disease	rs11136000	dbSNP	8	27607002	27607002	A comprehensive genetic association study of Alzheimer disease in African Americans.	Logue MW, Schu M, Vardarajan BN, Buros J, Green RC, Go RC, Griffith P, Obisesan TO, Shatz R, Borenstein A, Cupples LA, Lunetta KL, Fallin MD, Baldwin CT, Farrer LA, Multi-Institutional Research on Alzheimer Genetic Epidemiology (MIRAGE) Study Group.	2011	22159054	PMC3356921		Variants (including SNPs and indels) imported from dbSNP
atrial septal defect	DOID:1882	atrial heart septal defect	rs72554028	dbSNP	5	173233001	173233001	A Comprehensive In Silico Analysis on the Structural and Functional Impact of SNPs in the Congenital Heart Defects Associated with NKX2-5 Gene-A Molecular Dynamic Simulation Approach.	Abdul Samad F, Suliman BA, Basha SH, Manivasagam T, Essa MM.	2016	27152669	PMC4859487	benign,likely benign,pathogenic	Variants (including SNPs and indels) imported from dbSNP
atrial septal defect 7 with or without atrioventricular conduction defects	DOID:1882	atrial heart septal defect	rs3729754	dbSNP	5	173232912	173232912	A Comprehensive In Silico Analysis on the Structural and Functional Impact of SNPs in the Congenital Heart Defects Associated with NKX2-5 Gene-A Molecular Dynamic Simulation Approach.	Abdul Samad F, Suliman BA, Basha SH, Manivasagam T, Essa MM.	2016	27152669	PMC4859487	uncertain significance,likely benign	Variants (including SNPs and indels) imported from dbSNP
atrial septal defect 7 with or without atrioventricular conduction defects	DOID:1882	atrial heart septal defect	rs28936670	dbSNP	5	173235011	173235011	A Comprehensive In Silico Analysis on the Structural and Functional Impact of SNPs in the Congenital Heart Defects Associated with NKX2-5 Gene-A Molecular Dynamic Simulation Approach.	Abdul Samad F, Suliman BA, Basha SH, Manivasagam T, Essa MM.	2016	27152669	PMC4859487	benign,pathogenic	Variants (including SNPs and indels) imported from dbSNP
atrial septal defect 7 with or without atrioventricular conduction defects	DOID:1882	atrial heart septal defect	rs72554028	dbSNP	5	173233001	173233001	A Comprehensive In Silico Analysis on the Structural and Functional Impact of SNPs in the Congenital Heart Defects Associated with NKX2-5 Gene-A Molecular Dynamic Simulation Approach.	Abdul Samad F, Suliman BA, Basha SH, Manivasagam T, Essa MM.	2016	27152669	PMC4859487	benign,likely benign,pathogenic	Variants (including SNPs and indels) imported from dbSNP
atrial septal defect 7 with or without atrioventricular conduction defects	DOID:1882	atrial heart septal defect	rs104893900	dbSNP	5	173233011	173233011	A Comprehensive In Silico Analysis on the Structural and Functional Impact of SNPs in the Congenital Heart Defects Associated with NKX2-5 Gene-A Molecular Dynamic Simulation Approach.	Abdul Samad F, Suliman BA, Basha SH, Manivasagam T, Essa MM.	2016	27152669	PMC4859487	pathogenic	Variants (including SNPs and indels) imported from dbSNP
atrial septal defect 7 with or without atrioventricular conduction defects	DOID:1882	atrial heart septal defect	rs104893906	dbSNP	5	173232976	173232976	A Comprehensive In Silico Analysis on the Structural and Functional Impact of SNPs in the Congenital Heart Defects Associated with NKX2-5 Gene-A Molecular Dynamic Simulation Approach.	Abdul Samad F, Suliman BA, Basha SH, Manivasagam T, Essa MM.	2016	27152669	PMC4859487	pathogenic	Variants (including SNPs and indels) imported from dbSNP
atrial septal defect-atrioventricular conduction defects syndrome	DOID:1882	atrial heart septal defect	rs72554028	dbSNP	5	173233001	173233001	A Comprehensive In Silico Analysis on the Structural and Functional Impact of SNPs in the Congenital Heart Defects Associated with NKX2-5 Gene-A Molecular Dynamic Simulation Approach.	Abdul Samad F, Suliman BA, Basha SH, Manivasagam T, Essa MM.	2016	27152669	PMC4859487	benign,likely benign,pathogenic	Variants (including SNPs and indels) imported from dbSNP
cardiovascular phenotype	DOID:1287	cardiovascular system disease	rs28936670	dbSNP	5	173235011	173235011	A Comprehensive In Silico Analysis on the Structural and Functional Impact of SNPs in the Congenital Heart Defects Associated with NKX2-5 Gene-A Molecular Dynamic Simulation Approach.	Abdul Samad F, Suliman BA, Basha SH, Manivasagam T, Essa MM.	2016	27152669	PMC4859487	benign,pathogenic	Variants (including SNPs and indels) imported from dbSNP
cardiovascular phenotype	DOID:1287	cardiovascular system disease	rs72554028	dbSNP	5	173233001	173233001	A Comprehensive In Silico Analysis on the Structural and Functional Impact of SNPs in the Congenital Heart Defects Associated with NKX2-5 Gene-A Molecular Dynamic Simulation Approach.	Abdul Samad F, Suliman BA, Basha SH, Manivasagam T, Essa MM.	2016	27152669	PMC4859487	benign,likely benign,pathogenic	Variants (including SNPs and indels) imported from dbSNP
cardiovascular phenotype	DOID:1287	cardiovascular system disease	rs201582515	dbSNP	5	173233096	173233096	A Comprehensive In Silico Analysis on the Structural and Functional Impact of SNPs in the Congenital Heart Defects Associated with NKX2-5 Gene-A Molecular Dynamic Simulation Approach.	Abdul Samad F, Suliman BA, Basha SH, Manivasagam T, Essa MM.	2016	27152669	PMC4859487	uncertain significance	Variants (including SNPs and indels) imported from dbSNP
heart failure	DOID:114	heart disease	rs6444175	dbSNP	3	186861955	186861955	A comprehensive investigation of variants in genes encoding adiponectin (ADIPOQ) and its receptors (ADIPOR1/R2), and their association with serum adiponectin, type 2 diabetes, insulin resistance and the metabolic syndrome.	Peters KE, Beilby J, Cadby G, Warrington NM, Bruce DG, Davis WA, Davis TM, Wiltshire S, Knuiman M, McQuillan BM, Palmer LJ, Thompson PL, Hung J.	2013	23351195	PMC3598639		Variants (including SNPs and indels) imported from dbSNP
atrial fibrillation familial 10	DOID:0050650	familial atrial fibrillation	rs137854618	dbSNP	3	38566426	38566426	A connexin40 mutation associated with a malignant variant of progressive familial heart block type I.	Makita N, Seki A, Sumitomo N, Chkourko H, Fukuhara S, Watanabe H, Shimizu W, Bezzina CR, Hasdemir C, Mugishima H, Makiyama T, Baruteau A, Baron E, Horie M, Hagiwara N, Wilde AA, Probst V, Le Marec H, Roden DM, Mochizuki N, Schott JJ, Delmar M.	2012	22247482	PMC4274644	pathogenic	Variants (including SNPs and indels) imported from dbSNP
atrial standstill 1 digenic	DOID:10273	heart conduction disease	rs137854618	dbSNP	3	38566426	38566426	A connexin40 mutation associated with a malignant variant of progressive familial heart block type I.	Makita N, Seki A, Sumitomo N, Chkourko H, Fukuhara S, Watanabe H, Shimizu W, Bezzina CR, Hasdemir C, Mugishima H, Makiyama T, Baruteau A, Baron E, Horie M, Hagiwara N, Wilde AA, Probst V, Le Marec H, Roden DM, Mochizuki N, Schott JJ, Delmar M.	2012	22247482	PMC4274644	pathogenic	Variants (including SNPs and indels) imported from dbSNP
cardiovascular phenotype	DOID:1287	cardiovascular system disease	rs137854604	dbSNP	3	38551243	38551243	A connexin40 mutation associated with a malignant variant of progressive familial heart block type I.	Makita N, Seki A, Sumitomo N, Chkourko H, Fukuhara S, Watanabe H, Shimizu W, Bezzina CR, Hasdemir C, Mugishima H, Makiyama T, Baruteau A, Baron E, Horie M, Hagiwara N, Wilde AA, Probst V, Le Marec H, Roden DM, Mochizuki N, Schott JJ, Delmar M.	2012	22247482	PMC4274644	not provided,likely pathogenic,pathogenic	Variants (including SNPs and indels) imported from dbSNP
cardiovascular phenotype	DOID:1287	cardiovascular system disease	rs137854618	dbSNP	3	38566426	38566426	A connexin40 mutation associated with a malignant variant of progressive familial heart block type I.	Makita N, Seki A, Sumitomo N, Chkourko H, Fukuhara S, Watanabe H, Shimizu W, Bezzina CR, Hasdemir C, Mugishima H, Makiyama T, Baruteau A, Baron E, Horie M, Hagiwara N, Wilde AA, Probst V, Le Marec H, Roden DM, Mochizuki N, Schott JJ, Delmar M.	2012	22247482	PMC4274644	pathogenic	Variants (including SNPs and indels) imported from dbSNP
atrial fibrillation	DOID:0060224	atrial fibrillation	rs2200733	dbSNP	4	110789013	110789013	A contemporary review on the genetic basis of atrial fibrillation.	Roberts JD, Gollob MH.	2014	24932358	PMC4051329		Variants (including SNPs and indels) imported from dbSNP
atrial fibrillation	DOID:0060224	atrial fibrillation	rs13376333	dbSNP	1	154841877	154841877	A contemporary review on the genetic basis of atrial fibrillation.	Roberts JD, Gollob MH.	2014	24932358	PMC4051329		Variants (including SNPs and indels) imported from dbSNP
atrial fibrillation	DOID:0060224	atrial fibrillation	rs2106261	dbSNP	16	73017721	73017721	A contemporary review on the genetic basis of atrial fibrillation.	Roberts JD, Gollob MH.	2014	24932358	PMC4051329		Variants (including SNPs and indels) imported from dbSNP
atrial fibrillation	DOID:0060224	atrial fibrillation	rs7193343	dbSNP	16	72995261	72995261	A contemporary review on the genetic basis of atrial fibrillation.	Roberts JD, Gollob MH.	2014	24932358	PMC4051329		Variants (including SNPs and indels) imported from dbSNP
atrial fibrillation/atrial flutter	DOID:0050650	familial atrial fibrillation	rs2200733	dbSNP	4	110789013	110789013	A contemporary review on the genetic basis of atrial fibrillation.	Roberts JD, Gollob MH.	2014	24932358	PMC4051329		Variants (including SNPs and indels) imported from dbSNP
cardiovascular disease	DOID:1287	cardiovascular system disease	rs1229984	dbSNP	4	99318162	99318162	A Critical Review of Methods and Results in the Search for Genetic Contributors to Alcohol Sensitivity.	Schuckit MA.	2018	29623680	PMC5916326	protective	Variants (including SNPs and indels) imported from dbSNP
cardiomyopathy	DOID:0050700	cardiomyopathy	rs45618633	dbSNP	10	86718772	86718772	A Cypher/ZASP mutation associated with dilated cardiomyopathy alters the binding affinity to protein kinase C.	Arimura T, Hayashi T, Terada H, Lee SY, Zhou Q, Takahashi M, Ueda K, Nouchi T, Hohda S, Shibutani M, Hirose M, Chen J, Park JE, Yasunami M, Hayashi H, Kimura A.	2004	14660611		benign	Variants (including SNPs and indels) imported from dbSNP
cardiovascular phenotype	DOID:1287	cardiovascular system disease	rs45618633	dbSNP	10	86718772	86718772	A Cypher/ZASP mutation associated with dilated cardiomyopathy alters the binding affinity to protein kinase C.	Arimura T, Hayashi T, Terada H, Lee SY, Zhou Q, Takahashi M, Ueda K, Nouchi T, Hohda S, Shibutani M, Hirose M, Chen J, Park JE, Yasunami M, Hayashi H, Kimura A.	2004	14660611		benign	Variants (including SNPs and indels) imported from dbSNP
cardiovascular disease	DOID:1287	cardiovascular system disease	rs7412	dbSNP	19	44908822	44908822	A Database of Gene-Environment Interactions Pertaining to Blood Lipid Traits, Cardiovascular Disease and Type 2 Diabetes.	Lee YC, Lai CQ, Ordovas JM, Parnell LD.	2011	22328972	PMC3275815	pathogenic,drug response,other	Variants (including SNPs and indels) imported from dbSNP
cardiovascular risk factors	DOID:1287	cardiovascular system disease	rs7412	dbSNP	19	44908822	44908822	A Database of Gene-Environment Interactions Pertaining to Blood Lipid Traits, Cardiovascular Disease and Type 2 Diabetes.	Lee YC, Lai CQ, Ordovas JM, Parnell LD.	2011	22328972	PMC3275815	pathogenic,drug response,other	Variants (including SNPs and indels) imported from dbSNP
cardiovascular disease	DOID:1287	cardiovascular system disease	rs4277405	dbSNP	17	63471557	63471557	A Dataset of 26 Candidate Gene and Pro-Inflammatory Cytokine Variants for Association Studies in Idiopathic Pulmonary Fibrosis: Frequency Distribution in Normal Czech Population.	Kishore A, ЕЅiЕѕkovГЎ V, KocourkovГЎ L, Pet?ek M.	2015	26441981	PMC4585032		Variants (including SNPs and indels) imported from dbSNP
cardiovascular phenotype	DOID:1287	cardiovascular system disease	rs104894503	dbSNP	15	63060899	63060899	A de novo mutation in alpha-tropomyosin that causes hypertrophic cardiomyopathy.	Watkins H, Anan R, Coviello DA, Spirito P, Seidman JG, Seidman CE.	1995	7729014		pathogenic	Variants (including SNPs and indels) imported from dbSNP
familial hypertrophic cardiomyopathy 3	DOID:0080326	familial hypertrophic cardiomyopathy	rs104894503	dbSNP	15	63060899	63060899	A de novo mutation in alpha-tropomyosin that causes hypertrophic cardiomyopathy.	Watkins H, Anan R, Coviello DA, Spirito P, Seidman JG, Seidman CE.	1995	7729014		pathogenic	Variants (including SNPs and indels) imported from dbSNP
cardiovascular phenotype	DOID:1287	cardiovascular system disease	rs2277923	dbSNP	5	173235021	173235021	A de novo mutation in NKX2.5 associated with atrial septal defects, ventricular noncompaction, syncope and sudden death.	Ouyang P, Saarel E, Bai Y, Luo C, Lv Q, Xu Y, Wang F, Fan C, Younoszai A, Chen Q, Tu X, Wang QK.	2011	20932824	PMC2998397	benign	Variants (including SNPs and indels) imported from dbSNP
cardiomyopathy restrictive	DOID:0050700	cardiomyopathy	rs397516153	dbSNP	14	23424935	23424935	A de novo mutation of the beta cardiac myosin heavy chain gene in an infantile restrictive cardiomyopathy.	Karam S, Raboisson MJ, Ducreux C, Chalabreysse L, Millat G, Bozio A, Bouvagnet P.	2008	18380764		likely pathogenic,pathogenic	Variants (including SNPs and indels) imported from dbSNP
familial hypertrophic cardiomyopathy 1	DOID:0080326	familial hypertrophic cardiomyopathy	rs397516153	dbSNP	14	23424935	23424935	A de novo mutation of the beta cardiac myosin heavy chain gene in an infantile restrictive cardiomyopathy.	Karam S, Raboisson MJ, Ducreux C, Chalabreysse L, Millat G, Bozio A, Bouvagnet P.	2008	18380764		likely pathogenic,pathogenic	Variants (including SNPs and indels) imported from dbSNP
cardiovascular disease risk factors	DOID:1287	cardiovascular system disease	rs2075650	dbSNP	19	44892362	44892362	A decade in psychiatric GWAS research.	Horwitz T, Lam K, Chen Y, Xia Y, Liu C.	2019	29942042	PMC6372350		Variants (including SNPs and indels) imported from dbSNP
cardiovascular disease risk factors	DOID:1287	cardiovascular system disease	rs1800562	dbSNP	6	26092913	26092913	A decade in psychiatric GWAS research.	Horwitz T, Lam K, Chen Y, Xia Y, Liu C.	2019	29942042	PMC6372350	uncertain significance,pathogenic,risk factor,association	Variants (including SNPs and indels) imported from dbSNP
cardiovascular phenotype	DOID:1287	cardiovascular system disease	rs154001	dbSNP	5	128349443	128349443	A direct comparison of next generation sequencing enrichment methods using an aortopathy gene panel- clinical diagnostics perspective.	Wooderchak-Donahue WL, O'Fallon B, Furtado LV, Durtschi JD, Plant P, Ridge PG, Rope AF, Yetman AT, Bayrak-Toydemir P.	2012	23148498	PMC3534588	benign	Variants (including SNPs and indels) imported from dbSNP
cardiovascular phenotype	DOID:1287	cardiovascular system disease	rs1800255	dbSNP	2	188999354	188999354	A direct comparison of next generation sequencing enrichment methods using an aortopathy gene panel- clinical diagnostics perspective.	Wooderchak-Donahue WL, O'Fallon B, Furtado LV, Durtschi JD, Plant P, Ridge PG, Rope AF, Yetman AT, Bayrak-Toydemir P.	2012	23148498	PMC3534588	benign	Variants (including SNPs and indels) imported from dbSNP
cardiovascular phenotype	DOID:1287	cardiovascular system disease	rs1130529	dbSNP	1	11964178	11964178	A DNA pooling-based case-control study of myopia candidate genes COL11A1, COL18A1, FBN1, and PLOD1 in a Chinese population.	Yip SP, Leung KH, Fung WY, Ng PW, Sham PC, Yap MK.	2011	21527992	PMC3081793	benign	Variants (including SNPs and indels) imported from dbSNP
cardiovascular phenotype	DOID:1287	cardiovascular system disease	rs7529452	dbSNP	1	11949898	11949898	A DNA pooling-based case-control study of myopia candidate genes COL11A1, COL18A1, FBN1, and PLOD1 in a Chinese population.	Yip SP, Leung KH, Fung WY, Ng PW, Sham PC, Yap MK.	2011	21527992	PMC3081793	benign	Variants (including SNPs and indels) imported from dbSNP
cardiovascular phenotype	DOID:1287	cardiovascular system disease	rs7551175	dbSNP	1	11949899	11949899	A DNA pooling-based case-control study of myopia candidate genes COL11A1, COL18A1, FBN1, and PLOD1 in a Chinese population.	Yip SP, Leung KH, Fung WY, Ng PW, Sham PC, Yap MK.	2011	21527992	PMC3081793	benign	Variants (including SNPs and indels) imported from dbSNP
cardiomyopathy	DOID:0050700	cardiomyopathy	rs199474703	dbSNP	3	46860702	46860702	A DNA resequencing array for pathogenic mutation detection in hypertrophic cardiomyopathy.	Fokstuen S, Lyle R, Munoz A, Gehrig C, Lerch R, Perrot A, Osterziel KJ, Geier C, Beghetti M, Mach F, Sztajzel J, Sigwart U, Antonarakis SE, Blouin JL.	2008	18409188		likely pathogenic,pathogenic	Variants (including SNPs and indels) imported from dbSNP
cardiomyopathy	DOID:0050700	cardiomyopathy	rs201098973	dbSNP	11	47349782	47349782	A DNA resequencing array for pathogenic mutation detection in hypertrophic cardiomyopathy.	Fokstuen S, Lyle R, Munoz A, Gehrig C, Lerch R, Perrot A, Osterziel KJ, Geier C, Beghetti M, Mach F, Sztajzel J, Sigwart U, Antonarakis SE, Blouin JL.	2008	18409188		uncertain significance,benign,likely benign	Variants (including SNPs and indels) imported from dbSNP
cardiomyopathy	DOID:0050700	cardiomyopathy	rs121913628	dbSNP	14	23424059	23424059	A DNA resequencing array for pathogenic mutation detection in hypertrophic cardiomyopathy.	Fokstuen S, Lyle R, Munoz A, Gehrig C, Lerch R, Perrot A, Osterziel KJ, Geier C, Beghetti M, Mach F, Sztajzel J, Sigwart U, Antonarakis SE, Blouin JL.	2008	18409188		pathogenic	Variants (including SNPs and indels) imported from dbSNP
cardiovascular phenotype	DOID:1287	cardiovascular system disease	rs200411226	dbSNP	11	47342718	47342718	A DNA resequencing array for pathogenic mutation detection in hypertrophic cardiomyopathy.	Fokstuen S, Lyle R, Munoz A, Gehrig C, Lerch R, Perrot A, Osterziel KJ, Geier C, Beghetti M, Mach F, Sztajzel J, Sigwart U, Antonarakis SE, Blouin JL.	2008	18409188		pathogenic	Variants (including SNPs and indels) imported from dbSNP
cardiovascular phenotype	DOID:1287	cardiovascular system disease	rs201098973	dbSNP	11	47349782	47349782	A DNA resequencing array for pathogenic mutation detection in hypertrophic cardiomyopathy.	Fokstuen S, Lyle R, Munoz A, Gehrig C, Lerch R, Perrot A, Osterziel KJ, Geier C, Beghetti M, Mach F, Sztajzel J, Sigwart U, Antonarakis SE, Blouin JL.	2008	18409188		uncertain significance,benign,likely benign	Variants (including SNPs and indels) imported from dbSNP
cardiovascular phenotype	DOID:1287	cardiovascular system disease	rs387907267	dbSNP	11	47335120	47335120	A DNA resequencing array for pathogenic mutation detection in hypertrophic cardiomyopathy.	Fokstuen S, Lyle R, Munoz A, Gehrig C, Lerch R, Perrot A, Osterziel KJ, Geier C, Beghetti M, Mach F, Sztajzel J, Sigwart U, Antonarakis SE, Blouin JL.	2008	18409188		pathogenic	Variants (including SNPs and indels) imported from dbSNP
cardiovascular phenotype	DOID:1287	cardiovascular system disease	rs397515937	dbSNP	11	47339792	47339792	A DNA resequencing array for pathogenic mutation detection in hypertrophic cardiomyopathy.	Fokstuen S, Lyle R, Munoz A, Gehrig C, Lerch R, Perrot A, Osterziel KJ, Geier C, Beghetti M, Mach F, Sztajzel J, Sigwart U, Antonarakis SE, Blouin JL.	2008	18409188		pathogenic	Variants (including SNPs and indels) imported from dbSNP
cardiovascular phenotype	DOID:1287	cardiovascular system disease	rs397516037	dbSNP	11	47332189	47332189	A DNA resequencing array for pathogenic mutation detection in hypertrophic cardiomyopathy.	Fokstuen S, Lyle R, Munoz A, Gehrig C, Lerch R, Perrot A, Osterziel KJ, Geier C, Beghetti M, Mach F, Sztajzel J, Sigwart U, Antonarakis SE, Blouin JL.	2008	18409188		likely pathogenic,pathogenic	Variants (including SNPs and indels) imported from dbSNP
cardiovascular phenotype	DOID:1287	cardiovascular system disease	rs104894724	dbSNP	19	55154146	55154146	A DNA resequencing array for pathogenic mutation detection in hypertrophic cardiomyopathy.	Fokstuen S, Lyle R, Munoz A, Gehrig C, Lerch R, Perrot A, Osterziel KJ, Geier C, Beghetti M, Mach F, Sztajzel J, Sigwart U, Antonarakis SE, Blouin JL.	2008	18409188		pathogenic	Variants (including SNPs and indels) imported from dbSNP
cardiovascular phenotype	DOID:1287	cardiovascular system disease	rs121913628	dbSNP	14	23424059	23424059	A DNA resequencing array for pathogenic mutation detection in hypertrophic cardiomyopathy.	Fokstuen S, Lyle R, Munoz A, Gehrig C, Lerch R, Perrot A, Osterziel KJ, Geier C, Beghetti M, Mach F, Sztajzel J, Sigwart U, Antonarakis SE, Blouin JL.	2008	18409188		pathogenic	Variants (including SNPs and indels) imported from dbSNP
cardiovascular phenotype	DOID:1287	cardiovascular system disease	rs121913641	dbSNP	14	23425970	23425970	A DNA resequencing array for pathogenic mutation detection in hypertrophic cardiomyopathy.	Fokstuen S, Lyle R, Munoz A, Gehrig C, Lerch R, Perrot A, Osterziel KJ, Geier C, Beghetti M, Mach F, Sztajzel J, Sigwart U, Antonarakis SE, Blouin JL.	2008	18409188		uncertain significance,likely pathogenic,pathogenic	Variants (including SNPs and indels) imported from dbSNP
cardiovascular phenotype	DOID:1287	cardiovascular system disease	rs397516201	dbSNP	14	23418249	23418249	A DNA resequencing array for pathogenic mutation detection in hypertrophic cardiomyopathy.	Fokstuen S, Lyle R, Munoz A, Gehrig C, Lerch R, Perrot A, Osterziel KJ, Geier C, Beghetti M, Mach F, Sztajzel J, Sigwart U, Antonarakis SE, Blouin JL.	2008	18409188		uncertain significance,likely pathogenic	Variants (including SNPs and indels) imported from dbSNP
familial hypertrophic cardiomyopathy 1	DOID:0080326	familial hypertrophic cardiomyopathy	rs121913628	dbSNP	14	23424059	23424059	A DNA resequencing array for pathogenic mutation detection in hypertrophic cardiomyopathy.	Fokstuen S, Lyle R, Munoz A, Gehrig C, Lerch R, Perrot A, Osterziel KJ, Geier C, Beghetti M, Mach F, Sztajzel J, Sigwart U, Antonarakis SE, Blouin JL.	2008	18409188		pathogenic	Variants (including SNPs and indels) imported from dbSNP
familial hypertrophic cardiomyopathy 1	DOID:0080326	familial hypertrophic cardiomyopathy	rs121913641	dbSNP	14	23425970	23425970	A DNA resequencing array for pathogenic mutation detection in hypertrophic cardiomyopathy.	Fokstuen S, Lyle R, Munoz A, Gehrig C, Lerch R, Perrot A, Osterziel KJ, Geier C, Beghetti M, Mach F, Sztajzel J, Sigwart U, Antonarakis SE, Blouin JL.	2008	18409188		uncertain significance,likely pathogenic,pathogenic	Variants (including SNPs and indels) imported from dbSNP
familial hypertrophic cardiomyopathy 1	DOID:0080326	familial hypertrophic cardiomyopathy	rs727505294	dbSNP	14	23415385	23415385	A DNA resequencing array for pathogenic mutation detection in hypertrophic cardiomyopathy.	Fokstuen S, Lyle R, Munoz A, Gehrig C, Lerch R, Perrot A, Osterziel KJ, Geier C, Beghetti M, Mach F, Sztajzel J, Sigwart U, Antonarakis SE, Blouin JL.	2008	18409188		uncertain significance	Variants (including SNPs and indels) imported from dbSNP
familial hypertrophic cardiomyopathy 3	DOID:0080326	familial hypertrophic cardiomyopathy	rs199476315	dbSNP	15	63061723	63061723	A DNA resequencing array for pathogenic mutation detection in hypertrophic cardiomyopathy.	Fokstuen S, Lyle R, Munoz A, Gehrig C, Lerch R, Perrot A, Osterziel KJ, Geier C, Beghetti M, Mach F, Sztajzel J, Sigwart U, Antonarakis SE, Blouin JL.	2008	18409188		pathogenic	Variants (including SNPs and indels) imported from dbSNP
familial hypertrophic cardiomyopathy 4	DOID:0080326	familial hypertrophic cardiomyopathy	rs200411226	dbSNP	11	47342718	47342718	A DNA resequencing array for pathogenic mutation detection in hypertrophic cardiomyopathy.	Fokstuen S, Lyle R, Munoz A, Gehrig C, Lerch R, Perrot A, Osterziel KJ, Geier C, Beghetti M, Mach F, Sztajzel J, Sigwart U, Antonarakis SE, Blouin JL.	2008	18409188		pathogenic	Variants (including SNPs and indels) imported from dbSNP
familial hypertrophic cardiomyopathy 4	DOID:0080326	familial hypertrophic cardiomyopathy	rs387907267	dbSNP	11	47335120	47335120	A DNA resequencing array for pathogenic mutation detection in hypertrophic cardiomyopathy.	Fokstuen S, Lyle R, Munoz A, Gehrig C, Lerch R, Perrot A, Osterziel KJ, Geier C, Beghetti M, Mach F, Sztajzel J, Sigwart U, Antonarakis SE, Blouin JL.	2008	18409188		pathogenic	Variants (including SNPs and indels) imported from dbSNP
familial hypertrophic cardiomyopathy 4	DOID:0080326	familial hypertrophic cardiomyopathy	rs397515937	dbSNP	11	47339792	47339792	A DNA resequencing array for pathogenic mutation detection in hypertrophic cardiomyopathy.	Fokstuen S, Lyle R, Munoz A, Gehrig C, Lerch R, Perrot A, Osterziel KJ, Geier C, Beghetti M, Mach F, Sztajzel J, Sigwart U, Antonarakis SE, Blouin JL.	2008	18409188		pathogenic	Variants (including SNPs and indels) imported from dbSNP
familial hypertrophic cardiomyopathy 4	DOID:0080326	familial hypertrophic cardiomyopathy	rs397516037	dbSNP	11	47332189	47332189	A DNA resequencing array for pathogenic mutation detection in hypertrophic cardiomyopathy.	Fokstuen S, Lyle R, Munoz A, Gehrig C, Lerch R, Perrot A, Osterziel KJ, Geier C, Beghetti M, Mach F, Sztajzel J, Sigwart U, Antonarakis SE, Blouin JL.	2008	18409188		likely pathogenic,pathogenic	Variants (including SNPs and indels) imported from dbSNP
familial hypertrophic cardiomyopathy 7	DOID:0080326	familial hypertrophic cardiomyopathy	rs104894724	dbSNP	19	55154146	55154146	A DNA resequencing array for pathogenic mutation detection in hypertrophic cardiomyopathy.	Fokstuen S, Lyle R, Munoz A, Gehrig C, Lerch R, Perrot A, Osterziel KJ, Geier C, Beghetti M, Mach F, Sztajzel J, Sigwart U, Antonarakis SE, Blouin JL.	2008	18409188		pathogenic	Variants (including SNPs and indels) imported from dbSNP
familial hypertrophic cardiomyopathy 8	DOID:0080326	familial hypertrophic cardiomyopathy	rs199474703	dbSNP	3	46860702	46860702	A DNA resequencing array for pathogenic mutation detection in hypertrophic cardiomyopathy.	Fokstuen S, Lyle R, Munoz A, Gehrig C, Lerch R, Perrot A, Osterziel KJ, Geier C, Beghetti M, Mach F, Sztajzel J, Sigwart U, Antonarakis SE, Blouin JL.	2008	18409188		likely pathogenic,pathogenic	Variants (including SNPs and indels) imported from dbSNP
atrial fibrillation	DOID:0060224	atrial fibrillation	rs242557	dbSNP	17	45942346	45942346	A DNAzyme sensor based on target-catalyzed hairpin assembly for enzyme-free and non-label single nucleotide polymorphism genotyping.	Xu H, Wu Q, Shen H.	2017	28340771			Variants (including SNPs and indels) imported from dbSNP
atrial fibrillation	DOID:0060224	atrial fibrillation	rs242557	dbSNP	CHR_HSCHR17_1_CTG5	46155482	46155482	A DNAzyme sensor based on target-catalyzed hairpin assembly for enzyme-free and non-label single nucleotide polymorphism genotyping.	Xu H, Wu Q, Shen H.	2017	28340771			Variants (including SNPs and indels) imported from dbSNP
atrial fibrillation	DOID:0060224	atrial fibrillation	rs242557	dbSNP	CHR_HSCHR17_2_CTG5	45953998	45953998	A DNAzyme sensor based on target-catalyzed hairpin assembly for enzyme-free and non-label single nucleotide polymorphism genotyping.	Xu H, Wu Q, Shen H.	2017	28340771			Variants (including SNPs and indels) imported from dbSNP
cardiomyopathy hypertrophic mitochondrial	DOID:0050700	cardiomyopathy	rs3134560	dbSNP	MT	12192	12192	A double mutation (G11778A and G12192A) in mitochondrial DNA associated with Leber's hereditary optic neuropathy and cardiomyopathy.	Mimaki M, Ikota A, Sato A, Komaki H, Akanuma J, Nonaka I, Goto Y.	2003	12560876		pathogenic	Variants (including SNPs and indels) imported from dbSNP
cardiomyopathy idiopathic dilated mitochondrial	DOID:0050700	cardiomyopathy	rs3134560	dbSNP	MT	12192	12192	A double mutation (G11778A and G12192A) in mitochondrial DNA associated with Leber's hereditary optic neuropathy and cardiomyopathy.	Mimaki M, Ikota A, Sato A, Komaki H, Akanuma J, Nonaka I, Goto Y.	2003	12560876		pathogenic	Variants (including SNPs and indels) imported from dbSNP
cardiovascular phenotype	DOID:1287	cardiovascular system disease	rs199472730	dbSNP	11	2572895	2572895	A dual mechanism for I(Ks) current reduction by the pathogenic mutation KCNQ1-S277L.	Chen J, Weber M, Um SY, Walsh CA, Tang Y, McDonald TV.	2011	21895724	PMC3237915	not provided,likely pathogenic,pathogenic	Variants (including SNPs and indels) imported from dbSNP
cardiovascular phenotype	DOID:1287	cardiovascular system disease	rs2070825	dbSNP	X	154353564	154353564	A dual phenotype of periventricular nodular heterotopia and frontometaphyseal dysplasia in one patient caused by a single FLNA mutation leading to two functionally different aberrant transcripts.	Zenker M, Rauch A, Winterpacht A, Tagariello A, Kraus C, Rupprecht T, Sticht H, Reis A.	2004	14988809	PMC1181949	benign	Variants (including SNPs and indels) imported from dbSNP
cardiomyopathy	DOID:0050700	cardiomyopathy	rs121908987	dbSNP	7	151576412	151576412	A familial form of conduction defect related to a mutation in the PRKAG2 gene.	Charron P, Genest M, Richard P, Komajda M, Pochmalicki G.	2007	17483151		uncertain significance,pathogenic	Variants (including SNPs and indels) imported from dbSNP
cardiovascular phenotype	DOID:1287	cardiovascular system disease	rs121908987	dbSNP	7	151576412	151576412	A familial form of conduction defect related to a mutation in the PRKAG2 gene.	Charron P, Genest M, Richard P, Komajda M, Pochmalicki G.	2007	17483151		uncertain significance,pathogenic	Variants (including SNPs and indels) imported from dbSNP
familial hypertrophic cardiomyopathy 6	DOID:0080326	familial hypertrophic cardiomyopathy	rs121908987	dbSNP	7	151576412	151576412	A familial form of conduction defect related to a mutation in the PRKAG2 gene.	Charron P, Genest M, Richard P, Komajda M, Pochmalicki G.	2007	17483151		uncertain significance,pathogenic	Variants (including SNPs and indels) imported from dbSNP
familial hypertrophic cardiomyopathy 3	DOID:0080326	familial hypertrophic cardiomyopathy	rs104894502	dbSNP	15	63060915	63060915	A familial hypertrophic cardiomyopathy alpha-tropomyosin mutation causes severe cardiac hypertrophy and death in mice.	Prabhakar R, Boivin GP, Grupp IL, Hoit B, Arteaga G, Solaro RJ, Wieczorek DF.	2001	11603924		not provided,pathogenic	Variants (including SNPs and indels) imported from dbSNP
atrial fibrillation familial 6	DOID:0050650	familial atrial fibrillation	rs587776851	dbSNP	1	11846008	11846009	A familial mutation renders atrial natriuretic Peptide resistant to proteolytic degradation.	Dickey DM, Yoder AR, Potter LR.	2009	19458086	PMC2740543	pathogenic	Variants (including SNPs and indels) imported from dbSNP
cardiomyopathy	DOID:0050700	cardiomyopathy	rs104894845	dbSNP	X	101401752	101401752	A family with Fabry disease diagnosed by a single angiokeratoma.	Corry A, Feighery C, Alderdice D, Stewart F, Walsh M, Dolan OM.	2011	21549080		uncertain significance,likely pathogenic,pathogenic	Variants (including SNPs and indels) imported from dbSNP
cardiovascular phenotype	DOID:1287	cardiovascular system disease	rs104894845	dbSNP	X	101401752	101401752	A family with Fabry disease diagnosed by a single angiokeratoma.	Corry A, Feighery C, Alderdice D, Stewart F, Walsh M, Dolan OM.	2011	21549080		uncertain significance,likely pathogenic,pathogenic	Variants (including SNPs and indels) imported from dbSNP
cardiomyopathy	DOID:0050700	cardiomyopathy	rs727503260	dbSNP	14	23425403	23425403	A fetus with hypertrophic cardiomyopathy, restrictive, and single-ventricle physiology, and a beta-myosin heavy chain mutation.	Hinton RB, Michelfelder EC, Marino BS, Bove KE, Ware SM.	2010	20394946	PMC2886151	likely pathogenic,pathogenic	Variants (including SNPs and indels) imported from dbSNP
cardiovascular phenotype	DOID:1287	cardiovascular system disease	rs727503260	dbSNP	14	23425403	23425403	A fetus with hypertrophic cardiomyopathy, restrictive, and single-ventricle physiology, and a beta-myosin heavy chain mutation.	Hinton RB, Michelfelder EC, Marino BS, Bove KE, Ware SM.	2010	20394946	PMC2886151	likely pathogenic,pathogenic	Variants (including SNPs and indels) imported from dbSNP
familial hypertrophic cardiomyopathy 1	DOID:0080326	familial hypertrophic cardiomyopathy	rs727503260	dbSNP	14	23425403	23425403	A fetus with hypertrophic cardiomyopathy, restrictive, and single-ventricle physiology, and a beta-myosin heavy chain mutation.	Hinton RB, Michelfelder EC, Marino BS, Bove KE, Ware SM.	2010	20394946	PMC2886151	likely pathogenic,pathogenic	Variants (including SNPs and indels) imported from dbSNP
cardiac valvular dysplasia x-linked	DOID:4079	heart valve disease	rs80338841	dbSNP	X	154364625	154364625	A filamin A splice mutation resulting in a syndrome of facial dysmorphism, periventricular nodular heterotopia, and severe constipation reminiscent of cerebro-fronto-facial syndrome.	Hehr U, Hehr A, Uyanik G, Phelan E, Winkler J, Reardon W.	2006	16299064	PMC2564542	pathogenic	Variants (including SNPs and indels) imported from dbSNP
cardiovascular phenotype	DOID:1287	cardiovascular system disease	rs137853319	dbSNP	X	154359839	154359839	A filamin A splice mutation resulting in a syndrome of facial dysmorphism, periventricular nodular heterotopia, and severe constipation reminiscent of cerebro-fronto-facial syndrome.	Hehr U, Hehr A, Uyanik G, Phelan E, Winkler J, Reardon W.	2006	16299064	PMC2564542	benign,pathogenic	Variants (including SNPs and indels) imported from dbSNP
heart failure	DOID:114	heart disease	rs2046383	dbSNP	12	29951209	29951209	A follow-up study for left ventricular mass on chromosome 12p11 identifies potential candidate genes.	Della-Morte D, Beecham A, Rundek T, Wang L, McClendon MS, Slifer S, Blanton SH, Di Tullio MR, Sacco RL.	2011	21791083	PMC3199748		Variants (including SNPs and indels) imported from dbSNP
cardiovascular phenotype	DOID:1287	cardiovascular system disease	rs120074180	dbSNP	11	2572882	2572882	A founder mutation of the potassium channel KCNQ1 in long QT syndrome: implications for estimation of disease prevalence and molecular diagnostics.	Piippo K, Swan H, Pasternack M, Chapman H, Paavonen K, Viitasalo M, Toivonen L, Kontula K.	2001	11216980		not provided,pathogenic	Variants (including SNPs and indels) imported from dbSNP
cardiovascular phenotype	DOID:1287	cardiovascular system disease	rs120074190	dbSNP	11	2778009	2778009	A founder mutation of the potassium channel KCNQ1 in long QT syndrome: implications for estimation of disease prevalence and molecular diagnostics.	Piippo K, Swan H, Pasternack M, Chapman H, Paavonen K, Viitasalo M, Toivonen L, Kontula K.	2001	11216980		not provided,pathogenic	Variants (including SNPs and indels) imported from dbSNP
cardiovascular phenotype	DOID:1287	cardiovascular system disease	rs120074190	dbSNP	CHR_HSCHR11_1_CTG7	2778009	2778009	A founder mutation of the potassium channel KCNQ1 in long QT syndrome: implications for estimation of disease prevalence and molecular diagnostics.	Piippo K, Swan H, Pasternack M, Chapman H, Paavonen K, Viitasalo M, Toivonen L, Kontula K.	2001	11216980		not provided,pathogenic	Variants (including SNPs and indels) imported from dbSNP
cardiovascular phenotype	DOID:1287	cardiovascular system disease	rs139042529	dbSNP	11	2570663	2570663	A founder mutation of the potassium channel KCNQ1 in long QT syndrome: implications for estimation of disease prevalence and molecular diagnostics.	Piippo K, Swan H, Pasternack M, Chapman H, Paavonen K, Viitasalo M, Toivonen L, Kontula K.	2001	11216980		benign,likely benign,pathogenic	Variants (including SNPs and indels) imported from dbSNP
cardiomyopathy	DOID:0050700	cardiomyopathy	rs397515905	dbSNP	11	47342719	47342719	A founder MYBPC3 mutation results in HCM with a high risk of sudden death after the fourth decade of life.	Calore C, De Bortoli M, Romualdi C, Lorenzon A, Angelini A, Basso C, Thiene G, Iliceto S, Rampazzo A, Melacini P.	2015	25740977		uncertain significance,likely pathogenic,pathogenic	Variants (including SNPs and indels) imported from dbSNP
cardiovascular phenotype	DOID:1287	cardiovascular system disease	rs121909374	dbSNP	11	47342578	47342578	A founder MYBPC3 mutation results in HCM with a high risk of sudden death after the fourth decade of life.	Calore C, De Bortoli M, Romualdi C, Lorenzon A, Angelini A, Basso C, Thiene G, Iliceto S, Rampazzo A, Melacini P.	2015	25740977		pathogenic	Variants (including SNPs and indels) imported from dbSNP
cardiovascular phenotype	DOID:1287	cardiovascular system disease	rs397515905	dbSNP	11	47342719	47342719	A founder MYBPC3 mutation results in HCM with a high risk of sudden death after the fourth decade of life.	Calore C, De Bortoli M, Romualdi C, Lorenzon A, Angelini A, Basso C, Thiene G, Iliceto S, Rampazzo A, Melacini P.	2015	25740977		uncertain significance,likely pathogenic,pathogenic	Variants (including SNPs and indels) imported from dbSNP
familial hypertrophic cardiomyopathy 1	DOID:0080326	familial hypertrophic cardiomyopathy	rs121909374	dbSNP	11	47342578	47342578	A founder MYBPC3 mutation results in HCM with a high risk of sudden death after the fourth decade of life.	Calore C, De Bortoli M, Romualdi C, Lorenzon A, Angelini A, Basso C, Thiene G, Iliceto S, Rampazzo A, Melacini P.	2015	25740977		pathogenic	Variants (including SNPs and indels) imported from dbSNP
familial hypertrophic cardiomyopathy 1	DOID:0080326	familial hypertrophic cardiomyopathy	rs397515905	dbSNP	11	47342719	47342719	A founder MYBPC3 mutation results in HCM with a high risk of sudden death after the fourth decade of life.	Calore C, De Bortoli M, Romualdi C, Lorenzon A, Angelini A, Basso C, Thiene G, Iliceto S, Rampazzo A, Melacini P.	2015	25740977		uncertain significance,likely pathogenic,pathogenic	Variants (including SNPs and indels) imported from dbSNP
familial hypertrophic cardiomyopathy 4	DOID:0080326	familial hypertrophic cardiomyopathy	rs121909374	dbSNP	11	47342578	47342578	A founder MYBPC3 mutation results in HCM with a high risk of sudden death after the fourth decade of life.	Calore C, De Bortoli M, Romualdi C, Lorenzon A, Angelini A, Basso C, Thiene G, Iliceto S, Rampazzo A, Melacini P.	2015	25740977		pathogenic	Variants (including SNPs and indels) imported from dbSNP
familial hypertrophic cardiomyopathy 4	DOID:0080326	familial hypertrophic cardiomyopathy	rs397516080	dbSNP	11	47346639	47346641	A founder MYBPC3 mutation results in HCM with a high risk of sudden death after the fourth decade of life.	Calore C, De Bortoli M, Romualdi C, Lorenzon A, Angelini A, Basso C, Thiene G, Iliceto S, Rampazzo A, Melacini P.	2015	25740977		likely pathogenic,pathogenic	Variants (including SNPs and indels) imported from dbSNP
cardiomyopathy	DOID:0050700	cardiomyopathy	rs730880336	dbSNP	11	47346255	47346259	A frame shift mutation, Arg346fs mutation, is identified in cardiac myosin-binding protein C gene in a Chinese family with hypertrophic cardiomyopathy	Xie WL, Liu WL, Hu DY, Cui W, Zhu TG, Li CL, Sun YH, Li L, Bian H.	2005	16061003		pathogenic	Variants (including SNPs and indels) imported from dbSNP
cardiovascular phenotype	DOID:1287	cardiovascular system disease	rs267607124	dbSNP	3	52451410	52451410	A functional and structural study of troponin C mutations related to hypertrophic cardiomyopathy.	Pinto JR, Parvatiyar MS, Jones MA, Liang J, Ackerman MJ, Potter JD.	2009	19439414	PMC2707221	uncertain significance,likely benign,likely pathogenic,pathogenic	Variants (including SNPs and indels) imported from dbSNP
cardiovascular phenotype	DOID:1287	cardiovascular system disease	rs267607125	dbSNP	3	52453993	52453993	A functional and structural study of troponin C mutations related to hypertrophic cardiomyopathy.	Pinto JR, Parvatiyar MS, Jones MA, Liang J, Ackerman MJ, Potter JD.	2009	19439414	PMC2707221	uncertain significance,likely pathogenic	Variants (including SNPs and indels) imported from dbSNP
familial hypertrophic cardiomyopathy 13	DOID:0080326	familial hypertrophic cardiomyopathy	rs267607124	dbSNP	3	52451410	52451410	A functional and structural study of troponin C mutations related to hypertrophic cardiomyopathy.	Pinto JR, Parvatiyar MS, Jones MA, Liang J, Ackerman MJ, Potter JD.	2009	19439414	PMC2707221	uncertain significance,likely benign,likely pathogenic,pathogenic	Variants (including SNPs and indels) imported from dbSNP
familial hypertrophic cardiomyopathy 13	DOID:0080326	familial hypertrophic cardiomyopathy	rs267607125	dbSNP	3	52453993	52453993	A functional and structural study of troponin C mutations related to hypertrophic cardiomyopathy.	Pinto JR, Parvatiyar MS, Jones MA, Liang J, Ackerman MJ, Potter JD.	2009	19439414	PMC2707221	uncertain significance,likely pathogenic	Variants (including SNPs and indels) imported from dbSNP
cardiovascular disease	DOID:1287	cardiovascular system disease	rs696	dbSNP	14	35401887	35401887	A functional haplotype of NFKB1 influence susceptibility to oral cancer: a population-based and in vitro study.	Chen F, Liu F, Yan L, Lin L, Qiu Y, Wang J, Wu J, Bao X, Hu Z, Cai L, He B.	2018	29635862	PMC5943439	benign	Variants (including SNPs and indels) imported from dbSNP
cardio-facio-cutaneous syndrome	DOID:0060233	cardiofaciocutaneous syndrome	rs712	dbSNP	12	25209618	25209618	A Functional Polymorphism in the Promoter of MiR-143/145 Is Associated With the Risk of Cervical Squamous Cell Carcinoma in Chinese Women: A Case-Control Study.	Liang Y, Sun R, Li L, Yuan F, Liang W, Wang L, Nie X, Chen P, Zhang L, Gao L.	2015	26252302	PMC4616598	likely benign	Variants (including SNPs and indels) imported from dbSNP
atrial fibrillation	DOID:0060224	atrial fibrillation	rs2595104	dbSNP	4	110631977	110631977	A Functional Variant Associated with Atrial Fibrillation Regulates PITX2c Expression through TFAP2a.	Ye J, Tucker NR, Weng LC, Clauss S, Lubitz SA, Ellinor PT.	2016	27866707	PMC5142106		Variants (including SNPs and indels) imported from dbSNP
atrial fibrillation	DOID:0060224	atrial fibrillation	rs6817105	dbSNP	4	110784612	110784612	A Functional Variant Associated with Atrial Fibrillation Regulates PITX2c Expression through TFAP2a.	Ye J, Tucker NR, Weng LC, Clauss S, Lubitz SA, Ellinor PT.	2016	27866707	PMC5142106		Variants (including SNPs and indels) imported from dbSNP
atrial fibrillation	DOID:0060224	atrial fibrillation	rs6843082	dbSNP	4	110796911	110796911	A Functional Variant Associated with Atrial Fibrillation Regulates PITX2c Expression through TFAP2a.	Ye J, Tucker NR, Weng LC, Clauss S, Lubitz SA, Ellinor PT.	2016	27866707	PMC5142106		Variants (including SNPs and indels) imported from dbSNP
atrial fibrillation	DOID:0060224	atrial fibrillation	rs2200733	dbSNP	4	110789013	110789013	A Functional Variant Associated with Atrial Fibrillation Regulates PITX2c Expression through TFAP2a.	Ye J, Tucker NR, Weng LC, Clauss S, Lubitz SA, Ellinor PT.	2016	27866707	PMC5142106		Variants (including SNPs and indels) imported from dbSNP
atrial fibrillation	DOID:0060224	atrial fibrillation	rs17042171	dbSNP	4	110787131	110787131	A Functional Variant Associated with Atrial Fibrillation Regulates PITX2c Expression through TFAP2a.	Ye J, Tucker NR, Weng LC, Clauss S, Lubitz SA, Ellinor PT.	2016	27866707	PMC5142106		Variants (including SNPs and indels) imported from dbSNP
atrial fibrillation/atrial flutter	DOID:0050650	familial atrial fibrillation	rs2200733	dbSNP	4	110789013	110789013	A Functional Variant Associated with Atrial Fibrillation Regulates PITX2c Expression through TFAP2a.	Ye J, Tucker NR, Weng LC, Clauss S, Lubitz SA, Ellinor PT.	2016	27866707	PMC5142106		Variants (including SNPs and indels) imported from dbSNP
cardiovascular phenotype	DOID:1287	cardiovascular system disease	rs1800255	dbSNP	2	188999354	188999354	A functional variant of the collagen type III alpha1 gene modify risk of sporadic intracranial aneurysms.	Chen J, Zhu Y, Jiang Y, Yu H, Sun K, Song W, Luan L, Lou K, Li Y, Jiang P, Pang Q, Hui R.	2012	22241462		benign	Variants (including SNPs and indels) imported from dbSNP
cardiomyopathy	DOID:0050700	cardiomyopathy	rs56816490	dbSNP	1	156135913	156135913	A G613A missense in the Hutchinson's progeria lamin A/C gene causes a lone, autosomal dominant atrioventricular block.	Villa F, Maci?g A, Spinelli CC, Ferrario A, Carrizzo A, Parisi A, Torella A, Montenero C, Condorelli G, Vecchione C, Nigro V, Montenero AS, Puca AA.	2014	25469153	PMC4251685	likely pathogenic,pathogenic	Variants (including SNPs and indels) imported from dbSNP
cardiovascular disease	DOID:1287	cardiovascular system disease	rs1801253	dbSNP	10	114045297	114045297	A gain-of-function polymorphism in a G-protein coupling domain of the human beta1-adrenergic receptor.	Mason DA, Moore JD, Green SA, Liggett SB.	1999	10212248		drug response	Variants (including SNPs and indels) imported from dbSNP
atrial septal defect 4	DOID:1882	atrial heart septal defect	rs267607106	dbSNP	7	35249968	35249968	A gain-of-function TBX20 mutation causes congenital atrial septal defects, patent foramen ovale and cardiac valve defects.	Posch MG, Gramlich M, Sunde M, Schmitt KR, Lee SH, Richter S, Kersten A, Perrot A, Panek AN, Al Khatib IH, Nemer G, MГ©garbanГ© A, Dietz R, Stiller B, Berger F, Harvey RP, Ozcelik C.	2010	19762328	PMC2981023	pathogenic	Variants (including SNPs and indels) imported from dbSNP
cardiovascular phenotype	DOID:1287	cardiovascular system disease	rs80338799	dbSNP	3	12585745	12585745	A GaN bulk crystal with improved structural quality grown by the ammonothermal method.	Hashimoto T, Wu F, Speck JS, Nakamura S.	2007	17603489		likely pathogenic,pathogenic	Variants (including SNPs and indels) imported from dbSNP
cardiomyopathy	DOID:0050700	cardiomyopathy	rs121908987	dbSNP	7	151576412	151576412	A gene responsible for familial Wolff-Parkinson-White syndrome.	Anderson KP, Vidaillet HJ, Josephson ME.	2001	11586962		uncertain significance,pathogenic	Variants (including SNPs and indels) imported from dbSNP
cardiovascular phenotype	DOID:1287	cardiovascular system disease	rs121908987	dbSNP	7	151576412	151576412	A gene responsible for familial Wolff-Parkinson-White syndrome.	Anderson KP, Vidaillet HJ, Josephson ME.	2001	11586962		uncertain significance,pathogenic	Variants (including SNPs and indels) imported from dbSNP
familial hypertrophic cardiomyopathy 6	DOID:0080326	familial hypertrophic cardiomyopathy	rs121908987	dbSNP	7	151576412	151576412	A gene responsible for familial Wolff-Parkinson-White syndrome.	Anderson KP, Vidaillet HJ, Josephson ME.	2001	11586962		uncertain significance,pathogenic	Variants (including SNPs and indels) imported from dbSNP
cardiovascular disease	DOID:1287	cardiovascular system disease	rs11591147	dbSNP	1	55039974	55039974	A gene score of nine LDL and HDL regulating genes is associated with fluvastatin-induced cholesterol changes in women.	Hamrefors V, Orho-Melander M, Krauss RM, Hedblad B, Almgren P, Berglund G, Melander O.	2010	19773416	PMC2817592	benign,pathogenic,association	Variants (including SNPs and indels) imported from dbSNP
cardiovascular disease risk factors	DOID:1287	cardiovascular system disease	rs1260326	dbSNP	2	27508073	27508073	A gene variant in CERS2 is associated with rate of increase in albuminuria in patients with diabetes from ONTARGET and TRANSCEND.	Shiffman D, Pare G, Oberbauer R, Louie JZ, Rowland CM, Devlin JJ, Mann JF, McQueen MJ.	2014	25238615	PMC4169514	association	Variants (including SNPs and indels) imported from dbSNP
cardiovascular disease	DOID:1287	cardiovascular system disease	rs7412	dbSNP	19	44908822	44908822	A gene-brain-cognition pathway for the effect of an Alzheimer?s risk gene on working memory in young adults.	Stevens BW, DiBattista AM, William Rebeck G, Green AE.	2014	24967550	PMC4337824	pathogenic,drug response,other	Variants (including SNPs and indels) imported from dbSNP
cardiovascular risk factors	DOID:1287	cardiovascular system disease	rs7412	dbSNP	19	44908822	44908822	A gene-brain-cognition pathway for the effect of an Alzheimer?s risk gene on working memory in young adults.	Stevens BW, DiBattista AM, William Rebeck G, Green AE.	2014	24967550	PMC4337824	pathogenic,drug response,other	Variants (including SNPs and indels) imported from dbSNP
heart failure	DOID:114	heart disease	rs11136000	dbSNP	8	27607002	27607002	A gene-brain-cognition pathway for the effect of an Alzheimer?s risk gene on working memory in young adults.	Stevens BW, DiBattista AM, William Rebeck G, Green AE.	2014	24967550	PMC4337824		Variants (including SNPs and indels) imported from dbSNP
cardiovascular disease	DOID:1287	cardiovascular system disease	rs964184	dbSNP	11	116778201	116778201	A gene-centric association scan for Coagulation Factor VII levels in European and African Americans: the Candidate Gene Association Resource (CARe) Consortium.	Taylor KC, Lange LA, Zabaneh D, Lange E, Keating BJ, Tang W, Smith NL, Delaney JA, Kumari M, Hingorani A, North KE, Kivimaki M, Tracy RP, O'Donnell CJ, Folsom AR, Green D, Humphries SE, Reiner AP.	2011	21676895	PMC3153310		Variants (including SNPs and indels) imported from dbSNP
cardiovascular disease risk factors	DOID:1287	cardiovascular system disease	rs1260326	dbSNP	2	27508073	27508073	A gene-centric association scan for Coagulation Factor VII levels in European and African Americans: the Candidate Gene Association Resource (CARe) Consortium.	Taylor KC, Lange LA, Zabaneh D, Lange E, Keating BJ, Tang W, Smith NL, Delaney JA, Kumari M, Hingorani A, North KE, Kivimaki M, Tracy RP, O'Donnell CJ, Folsom AR, Green D, Humphries SE, Reiner AP.	2011	21676895	PMC3153310	association	Variants (including SNPs and indels) imported from dbSNP
cardiovascular risk factors (age interaction)	DOID:1287	cardiovascular system disease	rs12280753	dbSNP	11	116742944	116742944	A gene-centric association scan for Coagulation Factor VII levels in European and African Americans: the Candidate Gene Association Resource (CARe) Consortium.	Taylor KC, Lange LA, Zabaneh D, Lange E, Keating BJ, Tang W, Smith NL, Delaney JA, Kumari M, Hingorani A, North KE, Kivimaki M, Tracy RP, O'Donnell CJ, Folsom AR, Green D, Humphries SE, Reiner AP.	2011	21676895	PMC3153310		Variants (including SNPs and indels) imported from dbSNP
cardiovascular phenotype	DOID:1287	cardiovascular system disease	rs2228387	dbSNP	11	111911560	111911560	A genetic association analysis of cognitive ability and cognitive ageing using 325 markers for 109 genes associated with oxidative stress or cognition.	Harris SE, Fox H, Wright AF, Hayward C, Starr JM, Whalley LJ, Deary IJ.	2007	17601350	PMC1933580	benign	Variants (including SNPs and indels) imported from dbSNP
cardiovascular phenotype	DOID:1287	cardiovascular system disease	rs5992495	dbSNP	22	19895461	19895461	A genetic association analysis of cognitive ability and cognitive ageing using 325 markers for 109 genes associated with oxidative stress or cognition.	Harris SE, Fox H, Wright AF, Hayward C, Starr JM, Whalley LJ, Deary IJ.	2007	17601350	PMC1933580	benign	Variants (including SNPs and indels) imported from dbSNP
cardiovascular phenotype	DOID:1287	cardiovascular system disease	rs5748469	dbSNP	22	19919576	19919576	A genetic association analysis of cognitive ability and cognitive ageing using 325 markers for 109 genes associated with oxidative stress or cognition.	Harris SE, Fox H, Wright AF, Hayward C, Starr JM, Whalley LJ, Deary IJ.	2007	17601350	PMC1933580	benign	Variants (including SNPs and indels) imported from dbSNP
cardiovascular phenotype	DOID:1287	cardiovascular system disease	rs234706	dbSNP	21	43065240	43065240	A genetic association analysis of cognitive ability and cognitive ageing using 325 markers for 109 genes associated with oxidative stress or cognition.	Harris SE, Fox H, Wright AF, Hayward C, Starr JM, Whalley LJ, Deary IJ.	2007	17601350	PMC1933580	benign	Variants (including SNPs and indels) imported from dbSNP
atrial fibrillation	DOID:0060224	atrial fibrillation	rs3807989	dbSNP	7	116546187	116546187	A genetic polymorphism in the CAV1 gene associates with the development of bronchiolitis obliterans syndrome after lung transplantation.	Kastelijn EA, van Moorsel CH, Kazemier KM, Roothaan SM, Ruven HJ, Kwakkel-van Erp JM, van de Graaf EA, Zanen P, van Kessel DA, Grutters JC.	2011	22040717	PMC3215956		Variants (including SNPs and indels) imported from dbSNP
cardio-facio-cutaneous syndrome	DOID:0060233	cardiofaciocutaneous syndrome	rs113488022	dbSNP	7	140753336	140753336	A genetic progression model of Braf(V600E)-induced intestinal tumorigenesis reveals targets for therapeutic intervention.	Rad R, CadiГ±anos J, Rad L, Varela I, Strong A, Kriegl L, Constantino-Casas F, Eser S, Hieber M, Seidler B, Price S, Fraga MF, Calvanese V, Hoffman G, Ponstingl H, Schneider G, Yusa K, Grove C, Schmid RM, Wang W, Vassiliou G, Kirchner T, McDermott U, Liu P	2013	23845441	PMC3706745	likely pathogenic,pathogenic	Variants (including SNPs and indels) imported from dbSNP
cardiovascular disease	DOID:1287	cardiovascular system disease	rs9818870	dbSNP	3	138403280	138403280	A genetic risk score based on direct associations with coronary heart disease improves coronary heart disease risk prediction in the Atherosclerosis Risk in Communities (ARIC), but not in the Rotterdam and Framingham Offspring, Studies.	Brautbar A, Pompeii LA, Dehghan A, Ngwa JS, Nambi V, Virani SS, Rivadeneira F, Uitterlinden AG, Hofman A, Witteman JC, Pencina MJ, Folsom AR, Cupples LA, Ballantyne CM, Boerwinkle E.	2012	22789513	PMC3595115		Variants (including SNPs and indels) imported from dbSNP
heart failure	DOID:114	heart disease	rs1039084	dbSNP	6	147314277	147314277	A genetic risk score comprising known venous thromboembolism loci is associated with chronic venous disease in a multi-ethnic cohort.	Wassel CL, Rasmussen-Torvik LJ, Callas PW, Denenberg JO, Durda JP, Reiner AP, Smith NL, Allison MA, Rosendaal FR, Criqui MH, Cushman M.	2015	26442836	PMC4718662		Variants (including SNPs and indels) imported from dbSNP
atrial fibrillation	DOID:0060224	atrial fibrillation	rs6817105	dbSNP	4	110784612	110784612	A Genetic Risk Score for Atrial Fibrillation Predicts the Response to Catheter Ablation.	Choe WS, Kang JH, Choi EK, Shin SY, Lubitz SA, Ellinor PT, Oh S, Lim HE.	2019	30808078	PMC6428949		Variants (including SNPs and indels) imported from dbSNP
atrial fibrillation	DOID:0060224	atrial fibrillation	rs6843082	dbSNP	4	110796911	110796911	A Genetic Risk Score for Atrial Fibrillation Predicts the Response to Catheter Ablation.	Choe WS, Kang JH, Choi EK, Shin SY, Lubitz SA, Ellinor PT, Oh S, Lim HE.	2019	30808078	PMC6428949		Variants (including SNPs and indels) imported from dbSNP
atrial fibrillation	DOID:0060224	atrial fibrillation	rs2200733	dbSNP	4	110789013	110789013	A Genetic Risk Score for Atrial Fibrillation Predicts the Response to Catheter Ablation.	Choe WS, Kang JH, Choi EK, Shin SY, Lubitz SA, Ellinor PT, Oh S, Lim HE.	2019	30808078	PMC6428949		Variants (including SNPs and indels) imported from dbSNP
atrial fibrillation	DOID:0060224	atrial fibrillation	rs2106261	dbSNP	16	73017721	73017721	A Genetic Risk Score for Atrial Fibrillation Predicts the Response to Catheter Ablation.	Choe WS, Kang JH, Choi EK, Shin SY, Lubitz SA, Ellinor PT, Oh S, Lim HE.	2019	30808078	PMC6428949		Variants (including SNPs and indels) imported from dbSNP
atrial fibrillation/atrial flutter	DOID:0050650	familial atrial fibrillation	rs2200733	dbSNP	4	110789013	110789013	A Genetic Risk Score for Atrial Fibrillation Predicts the Response to Catheter Ablation.	Choe WS, Kang JH, Choi EK, Shin SY, Lubitz SA, Ellinor PT, Oh S, Lim HE.	2019	30808078	PMC6428949		Variants (including SNPs and indels) imported from dbSNP
cardiovascular disease	DOID:1287	cardiovascular system disease	rs964184	dbSNP	11	116778201	116778201	A genetic risk score for CAD, psychological stress, and their interaction as predictors of CAD, fatal MI, non-fatal MI and cardiovascular death.	Svensson T, Kitlinski M, EngstrГ¶m G, Melander O.	2017	28426714	PMC5398707		Variants (including SNPs and indels) imported from dbSNP
heart failure	DOID:114	heart disease	rs3094228	dbSNP	6	31462150	31462150	A genetic risk score for thyroid peroxidase antibodies associates with clinical thyroid disease in community-based populations.	Schultheiss UT, Teumer A, Medici M, Li Y, Daya N, Chaker L, Homuth G, Uitterlinden AG, Nauck M, Hofman A, Selvin E, VГ¶lzke H, Peeters RP, KГ¶ttgen A.	2015	25719932	PMC4422885		Variants (including SNPs and indels) imported from dbSNP
heart failure	DOID:114	heart disease	rs3094228	dbSNP	CHR_HSCHR6_MHC_COX_CTG1	31449594	31449594	A genetic risk score for thyroid peroxidase antibodies associates with clinical thyroid disease in community-based populations.	Schultheiss UT, Teumer A, Medici M, Li Y, Daya N, Chaker L, Homuth G, Uitterlinden AG, Nauck M, Hofman A, Selvin E, VГ¶lzke H, Peeters RP, KГ¶ttgen A.	2015	25719932	PMC4422885		Variants (including SNPs and indels) imported from dbSNP
heart failure	DOID:114	heart disease	rs3094228	dbSNP	CHR_HSCHR6_MHC_SSTO_CTG1	31452864	31452864	A genetic risk score for thyroid peroxidase antibodies associates with clinical thyroid disease in community-based populations.	Schultheiss UT, Teumer A, Medici M, Li Y, Daya N, Chaker L, Homuth G, Uitterlinden AG, Nauck M, Hofman A, Selvin E, VГ¶lzke H, Peeters RP, KГ¶ttgen A.	2015	25719932	PMC4422885		Variants (including SNPs and indels) imported from dbSNP
cardiovascular disease risk factors	DOID:1287	cardiovascular system disease	rs2199936	dbSNP	4	88124179	88124179	A genetic risk score is associated with statin-induced low-density lipoprotein cholesterol lowering.	Leusink M, Maitland-van der Zee AH, Ding B, Drenos F, van Iperen EP, Warren HR, Caulfield MJ, Cupples LA, Cushman M, Hingorani AD, Hoogeveen RC, Hovingh GK, Kumari M, Lange LA, Munroe PB, Nyberg F, Schreiner PJ, Sivapalaratnam S, de Bakker PI, de Boer A,	2016	27045730	PMC5558527		Variants (including SNPs and indels) imported from dbSNP
cardiovascular disease risk factors	DOID:1287	cardiovascular system disease	rs2075650	dbSNP	19	44892362	44892362	A genetic risk score is associated with statin-induced low-density lipoprotein cholesterol lowering.	Leusink M, Maitland-van der Zee AH, Ding B, Drenos F, van Iperen EP, Warren HR, Caulfield MJ, Cupples LA, Cushman M, Hingorani AD, Hoogeveen RC, Hovingh GK, Kumari M, Lange LA, Munroe PB, Nyberg F, Schreiner PJ, Sivapalaratnam S, de Bakker PI, de Boer A,	2016	27045730	PMC5558527		Variants (including SNPs and indels) imported from dbSNP
cardiovascular disease	DOID:1287	cardiovascular system disease	rs10786156	dbSNP	10	94254865	94254865	A genetic risk score is differentially associated with migraine with and without aura.	Pisanu C, Preisig M, Castelao E, Glaus J, Pistis G, Squassina A, Del Zompo M, Merikangas KR, Waeber G, Vollenweider P, Mwinyi J, SchiГ¶th HB.	2017	28656458	PMC5502071		Variants (including SNPs and indels) imported from dbSNP
cardiovascular disease	DOID:1287	cardiovascular system disease	rs7412	dbSNP	19	44908822	44908822	A genetic risk score is significantly associated with statin therapy response in the elderly population.	Ciuculete DM, Bandstein M, Benedict C, Waeber G, Vollenweider P, Lind L, SchiГ¶th HB, Mwinyi J.	2017	27943270		pathogenic,drug response,other	Variants (including SNPs and indels) imported from dbSNP
cardiovascular risk factors	DOID:1287	cardiovascular system disease	rs7412	dbSNP	19	44908822	44908822	A genetic risk score is significantly associated with statin therapy response in the elderly population.	Ciuculete DM, Bandstein M, Benedict C, Waeber G, Vollenweider P, Lind L, SchiГ¶th HB, Mwinyi J.	2017	27943270		pathogenic,drug response,other	Variants (including SNPs and indels) imported from dbSNP
cardiovascular disease	DOID:1287	cardiovascular system disease	rs12740374	dbSNP	1	109274968	109274968	A genetic risk tool for obesity predisposition assessment and personalized nutrition implementation based on macronutrient intake.	Goni L, Cuervo M, Milagro FI, MartГ­nez JA.	2015	25430627	PMC4246034	association	Variants (including SNPs and indels) imported from dbSNP
cardiovascular disease	DOID:1287	cardiovascular system disease	rs7412	dbSNP	19	44908822	44908822	A genetic risk tool for obesity predisposition assessment and personalized nutrition implementation based on macronutrient intake.	Goni L, Cuervo M, Milagro FI, MartГ­nez JA.	2015	25430627	PMC4246034	pathogenic,drug response,other	Variants (including SNPs and indels) imported from dbSNP
cardiovascular disease risk factors	DOID:1287	cardiovascular system disease	rs1260326	dbSNP	2	27508073	27508073	A genetic risk tool for obesity predisposition assessment and personalized nutrition implementation based on macronutrient intake.	Goni L, Cuervo M, Milagro FI, MartГ­nez JA.	2015	25430627	PMC4246034	association	Variants (including SNPs and indels) imported from dbSNP
cardiovascular risk factors	DOID:1287	cardiovascular system disease	rs7412	dbSNP	19	44908822	44908822	A genetic risk tool for obesity predisposition assessment and personalized nutrition implementation based on macronutrient intake.	Goni L, Cuervo M, Milagro FI, MartГ­nez JA.	2015	25430627	PMC4246034	pathogenic,drug response,other	Variants (including SNPs and indels) imported from dbSNP
cardiovascular disease risk factors	DOID:1287	cardiovascular system disease	rs6511720	dbSNP	19	11091630	11091630	A genetic variant in the LDLR promoter is responsible for part of the LDL-cholesterol variability in primary hypercholesterolemia.	De Castro-OrГіs I, PГ©rez-LГіpez J, Mateo-Gallego R, Rebollar S, Ledesma M, LeГіn M, CofГЎn M, Casasnovas JA, Ros E, RodrГ­guez-Rey JC, Civeira F, PocovГ­ M.	2014	24708769	PMC4021749	benign	Variants (including SNPs and indels) imported from dbSNP
cardio-facio-cutaneous syndrome	DOID:0060233	cardiofaciocutaneous syndrome	rs712	dbSNP	12	25209618	25209618	A genetic variant rs13293512 in the promoter of let-7 is associated with an increased risk of breast cancer in Chinese women.	Sun R, Gong J, Li J, Ruan Z, Yang X, Zheng Y, Qing L, He X, Jiang J, Peng Y, Zou H.	2019	31028134	PMC6533205	likely benign	Variants (including SNPs and indels) imported from dbSNP
cardiovascular disease	DOID:1287	cardiovascular system disease	rs7412	dbSNP	19	44908822	44908822	A Genetics-based Biomarker Risk Algorithm for Predicting Risk of Alzheimer's Disease.	Lutz MW, Sundseth SS, Burns DK, Saunders AM, Hayden KM, Burke JR, Welsh-Bohmer KA, Roses AD.	2016	27047990	PMC4817110	pathogenic,drug response,other	Variants (including SNPs and indels) imported from dbSNP
cardiovascular risk factors	DOID:1287	cardiovascular system disease	rs7412	dbSNP	19	44908822	44908822	A Genetics-based Biomarker Risk Algorithm for Predicting Risk of Alzheimer's Disease.	Lutz MW, Sundseth SS, Burns DK, Saunders AM, Hayden KM, Burke JR, Welsh-Bohmer KA, Roses AD.	2016	27047990	PMC4817110	pathogenic,drug response,other	Variants (including SNPs and indels) imported from dbSNP
cardiovascular disease	DOID:1287	cardiovascular system disease	rs3184504	dbSNP	12	111446804	111446804	A genome- and phenome-wide association study to identify genetic variants influencing platelet count and volume and their pleiotropic effects.	Shameer K, Denny JC, Ding K, Jouni H, Crosslin DR, de Andrade M, Chute CG, Peissig P, Pacheco JA, Li R, Bastarache L, Kho AN, Ritchie MD, Masys DR, Chisholm RL, Larson EB, McCarty CA, Roden DM, Jarvik GP, Kullo IJ.	2014	24026423	PMC3880605		Variants (including SNPs and indels) imported from dbSNP
heart rate	DOID:10273	heart conduction disease	rs6843953	dbSNP	4	13220123	13220123	A genome-wide association analysis identifies 16 novel susceptibility loci for carpal tunnel syndrome.	Wiberg A, Ng M, Schmid AB, Smillie RW, Baskozos G, Holmes MV, KГјnnapuu K, MГ¤gi R, Bennett DL, Furniss D.	2019	30833571	PMC6399342		Variants (including SNPs and indels) imported from dbSNP
cardiovascular disease	DOID:1287	cardiovascular system disease	rs11191580	dbSNP	10	103146454	103146454	A genome-wide association analysis of a broad psychosis phenotype identifies three loci for further investigation.	Psychosis Endophenotypes International Consortium, Wellcome Trust Case-Control Consortium 2, Bramon E, Pirinen M, Strange A, Lin K, Freeman C, Bellenguez C, Su Z, Band G, Pearson R, Vukcevic D, Langford C, Deloukas P, Hunt S, Gray E, Dronov S, Potter SC,	2014	23871474	PMC3923972		Variants (including SNPs and indels) imported from dbSNP
cardiovascular disease risk factors	DOID:1287	cardiovascular system disease	rs1800562	dbSNP	6	26092913	26092913	A genome-wide association analysis of serum iron concentrations.	Tanaka T, Roy CN, Yao W, Matteini A, Semba RD, Arking D, Walston JD, Fried LP, Singleton A, Guralnik J, Abecasis GR, Bandinelli S, Longo DL, Ferrucci L.	2010	19880490	PMC2803694	uncertain significance,pathogenic,risk factor,association	Variants (including SNPs and indels) imported from dbSNP
cardiovascular disease	DOID:1287	cardiovascular system disease	rs780093	dbSNP	2	27519736	27519736	A genome-wide association meta-analysis of circulating sex hormone-binding globulin reveals multiple Loci implicated in sex steroid hormone regulation.	Coviello AD, Haring R, Wellons M, Vaidya D, LehtimГ¤ki T, Keildson S, Lunetta KL, He C, Fornage M, Lagou V, Mangino M, Onland-Moret NC, Chen B, Eriksson J, Garcia M, Liu YM, Koster A, Lohman K, LyytikГ¤inen LP, Petersen AK, Prescott J, Stolk L, Vandenput L,	2012	22829776	PMC3400553		Variants (including SNPs and indels) imported from dbSNP
cardiovascular disease risk factors	DOID:1287	cardiovascular system disease	rs2075650	dbSNP	19	44892362	44892362	A genome-wide association meta-analysis of plasma A? peptides concentrations in the elderly.	Chouraki V, De Bruijn RF, Chapuis J, Bis JC, Reitz C, Schraen S, Ibrahim-Verbaas CA, Grenier-Boley B, Delay C, Rogers R, Demiautte F, Mounier A, Fitzpatrick AL, Alzheimer's Disease Neuroimaging Initiative, Berr C, Dartigues JF, Uitterlinden AG, Hofman A,	2014	24535457	PMC4418478		Variants (including SNPs and indels) imported from dbSNP
cardiovascular disease	DOID:1287	cardiovascular system disease	rs964184	dbSNP	11	116778201	116778201	A genome-wide association meta-analysis on apolipoprotein A-IV concentrations.	Lamina C, Friedel S, Coassin S, Rueedi R, Yousri NA, SeppГ¤lГ¤ I, Gieger C, SchГ¶nherr S, Forer L, Erhart G, Kollerits B, Marques-Vidal P, Ried J, Waeber G, Bergmann S, DГ¤hnhardt D, StГ¶ckl A, Kiechl S, Raitakari OT, KГ¤hГ¶nen M, Willeit J, Kedenko L, Paulweber	2016	27412012	PMC5179953		Variants (including SNPs and indels) imported from dbSNP
cardiovascular disease	DOID:1287	cardiovascular system disease	rs7412	dbSNP	19	44908822	44908822	A genome-wide association meta-analysis on lipoprotein (a) concentrations adjusted for apolipoprotein (a) isoforms.	Mack S, Coassin S, Rueedi R, Yousri NA, SeppГ¤lГ¤ I, Gieger C, SchГ¶nherr S, Forer L, Erhart G, Marques-Vidal P, Ried JS, Waeber G, Bergmann S, DГ¤hnhardt D, StГ¶ckl A, Raitakari OT, KГ¤hГ¶nen M, Peters A, Meitinger T, Strauch K, KORA-Study Group, Kedenko L, Pau	2017	28512139	PMC5580897	pathogenic,drug response,other	Variants (including SNPs and indels) imported from dbSNP
cardiovascular disease	DOID:1287	cardiovascular system disease	rs140570886	dbSNP	6	160591981	160591981	A genome-wide association meta-analysis on lipoprotein (a) concentrations adjusted for apolipoprotein (a) isoforms.	Mack S, Coassin S, Rueedi R, Yousri NA, SeppГ¤lГ¤ I, Gieger C, SchГ¶nherr S, Forer L, Erhart G, Marques-Vidal P, Ried JS, Waeber G, Bergmann S, DГ¤hnhardt D, StГ¶ckl A, Raitakari OT, KГ¤hГ¶nen M, Peters A, Meitinger T, Strauch K, KORA-Study Group, Kedenko L, Pau	2017	28512139	PMC5580897		Variants (including SNPs and indels) imported from dbSNP
cardiovascular risk factors	DOID:1287	cardiovascular system disease	rs7412	dbSNP	19	44908822	44908822	A genome-wide association meta-analysis on lipoprotein (a) concentrations adjusted for apolipoprotein (a) isoforms.	Mack S, Coassin S, Rueedi R, Yousri NA, SeppГ¤lГ¤ I, Gieger C, SchГ¶nherr S, Forer L, Erhart G, Marques-Vidal P, Ried JS, Waeber G, Bergmann S, DГ¤hnhardt D, StГ¶ckl A, Raitakari OT, KГ¤hГ¶nen M, Peters A, Meitinger T, Strauch K, KORA-Study Group, Kedenko L, Pau	2017	28512139	PMC5580897	pathogenic,drug response,other	Variants (including SNPs and indels) imported from dbSNP
cardiovascular phenotype	DOID:1287	cardiovascular system disease	rs2562829	dbSNP	2	178739639	178739639	A genome-wide association scan of RR and QT interval duration in 3 European genetically isolated populations: the EUROSPAN project.	Marroni F, Pfeufer A, Aulchenko YS, Franklin CS, Isaacs A, Pichler I, Wild SH, Oostra BA, Wright AF, Campbell H, Witteman JC, KГ¤Г¤b S, Hicks AA, Gyllensten U, Rudan I, Meitinger T, Pattaro C, van Duijn CM, Wilson JF, Pramstaller PP, EUROSPAN Consortium.	2009	20031603	PMC2760953	benign	Variants (including SNPs and indels) imported from dbSNP
cardiovascular phenotype	DOID:1287	cardiovascular system disease	rs12476289	dbSNP	2	178777248	178777248	A genome-wide association scan of RR and QT interval duration in 3 European genetically isolated populations: the EUROSPAN project.	Marroni F, Pfeufer A, Aulchenko YS, Franklin CS, Isaacs A, Pichler I, Wild SH, Oostra BA, Wright AF, Campbell H, Witteman JC, KГ¤Г¤b S, Hicks AA, Gyllensten U, Rudan I, Meitinger T, Pattaro C, van Duijn CM, Wilson JF, Pramstaller PP, EUROSPAN Consortium.	2009	20031603	PMC2760953	benign,likely benign	Variants (including SNPs and indels) imported from dbSNP
cardiovascular disease	DOID:1287	cardiovascular system disease	rs11591147	dbSNP	1	55039974	55039974	A genome-wide association study for blood lipid phenotypes in the Framingham Heart Study.	Kathiresan S, Manning AK, Demissie S, D'Agostino RB, Surti A, Guiducci C, Gianniny L, Burtt NP, Melander O, Orho-Melander M, Arnett DK, Peloso GM, Ordovas JM, Cupples LA.	2007	17903299	PMC1995614	benign,pathogenic,association	Variants (including SNPs and indels) imported from dbSNP
cardiovascular disease	DOID:1287	cardiovascular system disease	rs7412	dbSNP	19	44908822	44908822	A genome-wide association study for blood lipid phenotypes in the Framingham Heart Study.	Kathiresan S, Manning AK, Demissie S, D'Agostino RB, Surti A, Guiducci C, Gianniny L, Burtt NP, Melander O, Orho-Melander M, Arnett DK, Peloso GM, Ordovas JM, Cupples LA.	2007	17903299	PMC1995614	pathogenic,drug response,other	Variants (including SNPs and indels) imported from dbSNP
cardiovascular risk factors	DOID:1287	cardiovascular system disease	rs7412	dbSNP	19	44908822	44908822	A genome-wide association study for blood lipid phenotypes in the Framingham Heart Study.	Kathiresan S, Manning AK, Demissie S, D'Agostino RB, Surti A, Guiducci C, Gianniny L, Burtt NP, Melander O, Orho-Melander M, Arnett DK, Peloso GM, Ordovas JM, Cupples LA.	2007	17903299	PMC1995614	pathogenic,drug response,other	Variants (including SNPs and indels) imported from dbSNP
cardiovascular disease	DOID:1287	cardiovascular system disease	rs7412	dbSNP	19	44908822	44908822	A genome-wide association study for late-onset Alzheimer's disease using DNA pooling.	Abraham R, Moskvina V, Sims R, Hollingworth P, Morgan A, Georgieva L, Dowzell K, Cichon S, Hillmer AM, O'Donovan MC, Williams J, Owen MJ, Kirov G.	2008	18823527	PMC2570675	pathogenic,drug response,other	Variants (including SNPs and indels) imported from dbSNP
cardiovascular risk factors	DOID:1287	cardiovascular system disease	rs7412	dbSNP	19	44908822	44908822	A genome-wide association study for late-onset Alzheimer's disease using DNA pooling.	Abraham R, Moskvina V, Sims R, Hollingworth P, Morgan A, Georgieva L, Dowzell K, Cichon S, Hillmer AM, O'Donovan MC, Williams J, Owen MJ, Kirov G.	2008	18823527	PMC2570675	pathogenic,drug response,other	Variants (including SNPs and indels) imported from dbSNP
heart rate	DOID:10273	heart conduction disease	rs939661	dbSNP	15	79138721	79138721	A genome-wide association study for myopia and refractive error identifies a susceptibility locus at 15q25.	Hysi PG, Young TL, Mackey DA, Andrew T, FernГЎndez-Medarde A, Solouki AM, Hewitt AW, Macgregor S, Vingerling JR, Li YJ, Ikram MK, Fai LY, Sham PC, Manyes L, Porteros A, Lopes MC, Carbonaro F, Fahy SJ, Martin NG, van Duijn CM, Spector TD, Rahi JS, Santos E,	2010	20835236	PMC4115148		Variants (including SNPs and indels) imported from dbSNP
cardiovascular disease	DOID:1287	cardiovascular system disease	rs3809060	dbSNP	11	32437261	32437261	A genome-wide association study identifies four novel susceptibility loci underlying inguinal hernia.	Jorgenson E, Makki N, Shen L, Chen DC, Tian C, Eckalbar WL, Hinds D, Ahituv N, Avins A.	2015	26686553	PMC4703831		Variants (including SNPs and indels) imported from dbSNP
atrial fibrillation	DOID:0060224	atrial fibrillation	rs7193343	dbSNP	16	72995261	72995261	A genome-wide association study identifies novel and functionally related susceptibility Loci for Kawasaki disease.	Burgner D, Davila S, Breunis WB, Ng SB, Li Y, Bonnard C, Ling L, Wright VJ, Thalamuthu A, Odam M, Shimizu C, Burns JC, Levin M, Kuijpers TW, Hibberd ML, International Kawasaki Disease Genetics Consortium.	2009	19132087	PMC2607021		Variants (including SNPs and indels) imported from dbSNP
heart failure	DOID:114	heart disease	rs4618210	dbSNP	3	17082892	17082892	A genome-wide association study identifies PLCL2 and AP3D1-DOT1L-SF3A2 as new susceptibility loci for myocardial infarction in Japanese.	Hirokawa M, Morita H, Tajima T, Takahashi A, Ashikawa K, Miya F, Shigemizu D, Ozaki K, Sakata Y, Nakatani D, Suna S, Imai Y, Tanaka T, Tsunoda T, Matsuda K, Kadowaki T, Nakamura Y, Nagai R, Komuro I, Kubo M.	2015	24916648	PMC4326706		Variants (including SNPs and indels) imported from dbSNP
heart failure	DOID:114	heart disease	rs4618210	dbSNP	CHR_HG2236_PATCH	17082870	17082870	A genome-wide association study identifies PLCL2 and AP3D1-DOT1L-SF3A2 as new susceptibility loci for myocardial infarction in Japanese.	Hirokawa M, Morita H, Tajima T, Takahashi A, Ashikawa K, Miya F, Shigemizu D, Ozaki K, Sakata Y, Nakatani D, Suna S, Imai Y, Tanaka T, Tsunoda T, Matsuda K, Kadowaki T, Nakamura Y, Nagai R, Komuro I, Kubo M.	2015	24916648	PMC4326706		Variants (including SNPs and indels) imported from dbSNP
heart failure	DOID:114	heart disease	rs2571445	dbSNP	2	217818431	217818431	A genome-wide association study identifies risk loci for spirometric measures among smokers of European and African ancestry.	Lutz SM, Cho MH, Young K, Hersh CP, Castaldi PJ, McDonald ML, Regan E, Mattheisen M, DeMeo DL, Parker M, Foreman M, Make BJ, Jensen RL, Casaburi R, Lomas DA, Bhatt SP, Bakke P, Gulsvik A, Crapo JD, Beaty TH, Laird NM, Lange C, Hokanson JE, Silverman EK, E	2015	26634245	PMC4668640		Variants (including SNPs and indels) imported from dbSNP
cardiovascular phenotype	DOID:1287	cardiovascular system disease	rs12720449	dbSNP	11	2588804	2588804	A genome-wide association study identifies susceptibility variants for type 2 diabetes in Han Chinese.	Tsai FJ, Yang CF, Chen CC, Chuang LM, Lu CH, Chang CT, Wang TY, Chen RH, Shiu CF, Liu YM, Chang CC, Chen P, Chen CH, Fann CS, Chen YT, Wu JY.	2010	20174558	PMC2824763	uncertain significance,not provided,benign,likely benign	Variants (including SNPs and indels) imported from dbSNP
cardiovascular phenotype	DOID:1287	cardiovascular system disease	rs2234962	dbSNP	10	119670121	119670121	A genome-wide association study identifies two loci associated with heart failure due to dilated cardiomyopathy.	Villard E, Perret C, Gary F, Proust C, Dilanian G, Hengstenberg C, Ruppert V, Arbustini E, Wichter T, Germain M, Dubourg O, Tavazzi L, Aumont MC, DeGroote P, Fauchier L, Trochu JN, Gibelin P, Aupetit JF, Stark K, Erdmann J, Hetzer R, Roberts AM, Barton PJ	2011	21459883	PMC3086901	benign	Variants (including SNPs and indels) imported from dbSNP
cardiovascular phenotype	DOID:1287	cardiovascular system disease	rs3858340	dbSNP	10	119676774	119676774	A genome-wide association study identifies two loci associated with heart failure due to dilated cardiomyopathy.	Villard E, Perret C, Gary F, Proust C, Dilanian G, Hengstenberg C, Ruppert V, Arbustini E, Wichter T, Germain M, Dubourg O, Tavazzi L, Aumont MC, DeGroote P, Fauchier L, Trochu JN, Gibelin P, Aupetit JF, Stark K, Erdmann J, Hetzer R, Roberts AM, Barton PJ	2011	21459883	PMC3086901	benign	Variants (including SNPs and indels) imported from dbSNP
cardiovascular phenotype	DOID:1287	cardiovascular system disease	rs35434411	dbSNP	10	119669882	119669882	A genome-wide association study identifies two loci associated with heart failure due to dilated cardiomyopathy.	Villard E, Perret C, Gary F, Proust C, Dilanian G, Hengstenberg C, Ruppert V, Arbustini E, Wichter T, Germain M, Dubourg O, Tavazzi L, Aumont MC, DeGroote P, Fauchier L, Trochu JN, Gibelin P, Aupetit JF, Stark K, Erdmann J, Hetzer R, Roberts AM, Barton PJ	2011	21459883	PMC3086901	uncertain significance,benign,likely benign	Variants (including SNPs and indels) imported from dbSNP
cardiovascular phenotype	DOID:1287	cardiovascular system disease	rs145393807	dbSNP	10	119669950	119669950	A genome-wide association study identifies two loci associated with heart failure due to dilated cardiomyopathy.	Villard E, Perret C, Gary F, Proust C, Dilanian G, Hengstenberg C, Ruppert V, Arbustini E, Wichter T, Germain M, Dubourg O, Tavazzi L, Aumont MC, DeGroote P, Fauchier L, Trochu JN, Gibelin P, Aupetit JF, Stark K, Erdmann J, Hetzer R, Roberts AM, Barton PJ	2011	21459883	PMC3086901	likely benign	Variants (including SNPs and indels) imported from dbSNP
cardiovascular phenotype	DOID:1287	cardiovascular system disease	rs387906875	dbSNP	10	119670037	119670037	A genome-wide association study identifies two loci associated with heart failure due to dilated cardiomyopathy.	Villard E, Perret C, Gary F, Proust C, Dilanian G, Hengstenberg C, Ruppert V, Arbustini E, Wichter T, Germain M, Dubourg O, Tavazzi L, Aumont MC, DeGroote P, Fauchier L, Trochu JN, Gibelin P, Aupetit JF, Stark K, Erdmann J, Hetzer R, Roberts AM, Barton PJ	2011	21459883	PMC3086901	likely pathogenic,pathogenic	Variants (including SNPs and indels) imported from dbSNP
cardiovascular disease risk factors	DOID:1287	cardiovascular system disease	rs2075650	dbSNP	19	44892362	44892362	A genome-wide association study implicates the APOE locus in nonpathological cognitive ageing.	Davies G, Harris SE, Reynolds CA, Payton A, Knight HM, Liewald DC, Lopez LM, Luciano M, Gow AJ, Corley J, Henderson R, Murray C, Pattie A, Fox HC, Redmond P, Lutz MW, Chiba-Falek O, Linnertz C, Saith S, Haggarty P, McNeill G, Ke X, Ollier W, Horan M, Rose	2014	23207651			Variants (including SNPs and indels) imported from dbSNP
heart rate response to beta blockers (atenolol add-on therapy)	DOID:10273	heart conduction disease	rs13118928	dbSNP	4	144565237	144565237	A genome-wide association study in chronic obstructive pulmonary disease (COPD): identification of two major susceptibility loci.	Pillai SG, Ge D, Zhu G, Kong X, Shianna KV, Need AC, Feng S, Hersh CP, Bakke P, Gulsvik A, Ruppert A, LГёdrup Carlsen KC, Roses A, Anderson W, Rennard SI, Lomas DA, Silverman EK, Goldstein DB, ICGN Investigators.	2009	19300482	PMC2650282		Variants (including SNPs and indels) imported from dbSNP
cardiovascular disease risk factors	DOID:1287	cardiovascular system disease	rs1260326	dbSNP	2	27508073	27508073	A genome-wide association study in the Japanese population identifies the 12q24 locus for habitual coffee consumption: The J-MICC Study.	Nakagawa-Senda H, Hachiya T, Shimizu A, Hosono S, Oze I, Watanabe M, Matsuo K, Ito H, Hara M, Nishida Y, Endoh K, Kuriki K, Katsuura-Kamano S, Arisawa K, Nindita Y, Ibusuki R, Suzuki S, Hosono A, Mikami H, Nakamura Y, Takashima N, Nakamura Y, Kuriyama N,	2018	29367735	PMC5784172	association	Variants (including SNPs and indels) imported from dbSNP
heart failure	DOID:114	heart disease	rs10256504	dbSNP	7	3703923	3703923	A genome-wide association study of breast and prostate cancer in the NHLBI's Framingham Heart Study.	Murabito JM, Rosenberg CL, Finger D, Kreger BE, Levy D, Splansky GL, Antman K, Hwang SJ.	2007	17903305	PMC1995609		Variants (including SNPs and indels) imported from dbSNP
atrial fibrillation	DOID:0060224	atrial fibrillation	rs295114	dbSNP	2	200330879	200330879	A genome-wide association study of bronchodilator response in Latinos implicates rare variants.	Drake KA, Torgerson DG, Gignoux CR, Galanter JM, Roth LA, Huntsman S, Eng C, Oh SS, Yee SW, Lin L, Bustamante CD, Moreno-Estrada A, Sandoval K, Davis A, Borrell LN, Farber HJ, Kumar R, Avila PC, Brigino-Buenaventura E, Chapela R, Ford JG, Lenoir MA, Lurma	2014	23992748	PMC3938989		Variants (including SNPs and indels) imported from dbSNP
heart rate response to beta blockers (atenolol add-on therapy)	DOID:10273	heart conduction disease	rs13118928	dbSNP	4	144565237	144565237	A genome-wide association study of COPD identifies a susceptibility locus on chromosome 19q13.	Cho MH, Castaldi PJ, Wan ES, Siedlinski M, Hersh CP, Demeo DL, Himes BE, Sylvia JS, Klanderman BJ, Ziniti JP, Lange C, Litonjua AA, Sparrow D, Regan EA, Make BJ, Hokanson JE, Murray T, Hetmanski JB, Pillai SG, Kong X, Anderson WH, Tal-Singer R, Lomas DA,	2012	22080838	PMC3298111		Variants (including SNPs and indels) imported from dbSNP
cardiovascular phenotype	DOID:1287	cardiovascular system disease	rs3765623	dbSNP	18	3086067	3086067	A genome-wide association study of nephrolithiasis in the Japanese population identifies novel susceptible Loci at 5q35.3, 7p14.3, and 13q14.1.	Urabe Y, Tanikawa C, Takahashi A, Okada Y, Morizono T, Tsunoda T, Kamatani N, Kohri K, Chayama K, Kubo M, Nakamura Y, Matsuda K.	2012	22396660	PMC3291538	benign	Variants (including SNPs and indels) imported from dbSNP
atrial fibrillation	DOID:0060224	atrial fibrillation	rs4743034	dbSNP	9	106870072	106870072	A genome-wide association study of northwestern Europeans involves the C-type natriuretic peptide signaling pathway in the etiology of human height variation.	Estrada K, Krawczak M, Schreiber S, van Duijn K, Stolk L, van Meurs JB, Liu F, Penninx BW, Smit JH, Vogelzangs N, Hottenga JJ, Willemsen G, de Geus EJ, Lorentzon M, von Eller-Eberstein H, Lips P, Schoor N, Pop V, de Keijzer J, Hofman A, Aulchenko YS, Oost	2009	19570815	PMC2729669		Variants (including SNPs and indels) imported from dbSNP
cardiovascular disease risk factors	DOID:1287	cardiovascular system disease	rs1800562	dbSNP	6	26092913	26092913	A genome-wide association study of red blood cell traits using the electronic medical record.	Kullo IJ, Ding K, Jouni H, Smith CY, Chute CG.	2010	20927387	PMC2946914	uncertain significance,pathogenic,risk factor,association	Variants (including SNPs and indels) imported from dbSNP
cardiovascular disease	DOID:1287	cardiovascular system disease	rs603424	dbSNP	10	100315722	100315722	A genome-wide association study of red-blood cell fatty acids and ratios incorporating dietary covariates: Framingham Heart Study Offspring Cohort.	Kalsbeek A, Veenstra J, Westra J, Disselkoen C, Koch K, McKenzie KA, O'Bott J, Vander Woude J, Fischer K, Shearer GC, Harris WS, Tintle NL.	2018	29652918	PMC5898718		Variants (including SNPs and indels) imported from dbSNP
cardiovascular disease risk factors	DOID:1287	cardiovascular system disease	rs1260326	dbSNP	2	27508073	27508073	A genome-wide association study of the human metabolome in a community-based cohort.	Rhee EP, Ho JE, Chen MH, Shen D, Cheng S, Larson MG, Ghorbani A, Shi X, Helenius IT, O'Donnell CJ, Souza AL, Deik A, Pierce KA, Bullock K, Walford GA, Vasan RS, Florez JC, Clish C, Yeh JR, Wang TJ, Gerszten RE.	2013	23823483	PMC3973158	association	Variants (including SNPs and indels) imported from dbSNP
heart failure	DOID:114	heart disease	rs13130255	dbSNP	4	43535583	43535583	A genome-wide association study of the Protein C anticoagulant pathway.	Athanasiadis G, Buil A, Souto JC, Borrell M, LГіpez S, Martinez-Perez A, Lathrop M, Fontcuberta J, Almasy L, Soria JM.	2011	22216198	PMC3247258		Variants (including SNPs and indels) imported from dbSNP
cardiovascular disease	DOID:1287	cardiovascular system disease	rs6905288	dbSNP	6	43791136	43791136	A genome-wide association study of thyroid stimulating hormone and free thyroxine in Danish children and adolescents.	Nielsen TR, Appel EV, Svendstrup M, Ohrt JD, Dahl M, Fonvig CE, Hollensted M, Have CT, Kadarmideen HN, Pedersen O, Hansen T, Holm JC, Grarup N.	2017	28333968	PMC5363901		Variants (including SNPs and indels) imported from dbSNP
cardiovascular disease	DOID:1287	cardiovascular system disease	rs1229984	dbSNP	4	99318162	99318162	A genome-wide association study of upper aerodigestive tract cancers conducted within the INHANCE consortium.	McKay JD, Truong T, Gaborieau V, Chabrier A, Chuang SC, Byrnes G, Zaridze D, Shangina O, Szeszenia-Dabrowska N, Lissowska J, Rudnai P, Fabianova E, Bucur A, Bencko V, Holcatova I, Janout V, Foretova L, Lagiou P, Trichopoulos D, Benhamou S, Bouchardy C, Ah	2011	21437268	PMC3060072	protective	Variants (including SNPs and indels) imported from dbSNP
heart failure	DOID:114	heart disease	rs6444175	dbSNP	3	186861955	186861955	A genome-wide association study reveals variants in ARL15 that influence adiponectin levels.	Richards JB, Waterworth D, O'Rahilly S, Hivert MF, Loos RJ, Perry JR, Tanaka T, Timpson NJ, Semple RK, Soranzo N, Song K, Rocha N, Grundberg E, Dupuis J, Florez JC, Langenberg C, Prokopenko I, Saxena R, Sladek R, Aulchenko Y, Evans D, Waeber G, Erdmann J,	2009	20011104	PMC2781107		Variants (including SNPs and indels) imported from dbSNP
heart failure	DOID:114	heart disease	rs436324	dbSNP	4	178730293	178730293	A genome-wide investigation of SNPs and CNVs in schizophrenia.	Need AC, Ge D, Weale ME, Maia J, Feng S, Heinzen EL, Shianna KV, Yoon W, Kasperavici?te D, Gennarelli M, Strittmatter WJ, Bonvicini C, Rossi G, Jayathilake K, Cola PA, McEvoy JP, Keefe RS, Fisher EM, St Jean PL, Giegling I, Hartmann AM, MГ¶ller HJ, Ruppert	2009	19197363	PMC2631150		Variants (including SNPs and indels) imported from dbSNP
atrial fibrillation	DOID:0060224	atrial fibrillation	rs9899183	dbSNP	17	7549660	7549660	A genome-wide linkage scan reveals CD53 as an important regulator of innate TNF-alpha levels.	Bos SD, Lakenberg N, van der Breggen R, Houwing-Duistermaat JJ, Kloppenburg M, de Craen AJ, Beekman M, Meulenbelt I, Slagboom PE.	2010	20407468	PMC2987381		Variants (including SNPs and indels) imported from dbSNP
cardiovascular disease	DOID:1287	cardiovascular system disease	rs3184504	dbSNP	12	111446804	111446804	A genome-wide meta-analysis identifies 22 loci associated with eight hematological parameters in the HaemGen consortium.	Soranzo N, Spector TD, Mangino M, KГјhnel B, Rendon A, Teumer A, Willenborg C, Wright B, Chen L, Li M, Salo P, Voight BF, Burns P, Laskowski RA, Xue Y, Menzel S, Altshuler D, Bradley JR, Bumpstead S, Burnett MS, Devaney J, DГ¶ring A, Elosua R, Epstein SE, E	2009	19820697	PMC3108459		Variants (including SNPs and indels) imported from dbSNP
cardiovascular disease risk factors	DOID:1287	cardiovascular system disease	rs1800562	dbSNP	6	26092913	26092913	A genome-wide meta-analysis identifies 22 loci associated with eight hematological parameters in the HaemGen consortium.	Soranzo N, Spector TD, Mangino M, KГјhnel B, Rendon A, Teumer A, Willenborg C, Wright B, Chen L, Li M, Salo P, Voight BF, Burns P, Laskowski RA, Xue Y, Menzel S, Altshuler D, Bradley JR, Bumpstead S, Burnett MS, Devaney J, DГ¶ring A, Elosua R, Epstein SE, E	2009	19820697	PMC3108459	uncertain significance,pathogenic,risk factor,association	Variants (including SNPs and indels) imported from dbSNP
cardiovascular disease	DOID:1287	cardiovascular system disease	rs3184504	dbSNP	12	111446804	111446804	A genome-wide meta-analysis of six type 1 diabetes cohorts identifies multiple associated loci.	Bradfield JP, Qu HQ, Wang K, Zhang H, Sleiman PM, Kim CE, Mentch FD, Qiu H, Glessner JT, Thomas KA, Frackelton EC, Chiavacci RM, Imielinski M, Monos DS, Pandey R, Bakay M, Grant SF, Polychronakos C, Hakonarson H.	2011	21980299	PMC3183083		Variants (including SNPs and indels) imported from dbSNP
cardiovascular disease	DOID:1287	cardiovascular system disease	rs603424	dbSNP	10	100315722	100315722	A genome-wide metabolic QTL analysis in Europeans implicates two loci shaped by recent positive selection.	Nicholson G, Rantalainen M, Li JV, Maher AD, Malmodin D, Ahmadi KR, Faber JH, Barrett A, Min JL, Rayner NW, Toft H, Krestyaninova M, Viksna J, Neogi SG, Dumas ME, Sarkans U, MolPAGE Consortium, Donnelly P, Illig T, Adamski J, Suhre K, Allen M, Zondervan K	2011	21931564	PMC3169529		Variants (including SNPs and indels) imported from dbSNP
cardiovascular disease	DOID:1287	cardiovascular system disease	rs603424	dbSNP	10	100315722	100315722	A genome-wide perspective of genetic variation in human metabolism.	Illig T, Gieger C, Zhai G, RГ¶misch-Margl W, Wang-Sattler R, Prehn C, Altmaier E, KastenmГјller G, Kato BS, Mewes HW, Meitinger T, de Angelis MH, Kronenberg F, Soranzo N, Wichmann HE, Spector TD, Adamski J, Suhre K.	2010	20037589	PMC3773904		Variants (including SNPs and indels) imported from dbSNP
cardiovascular disease	DOID:1287	cardiovascular system disease	rs964184	dbSNP	11	116778201	116778201	A genome-wide perspective of genetic variation in human metabolism.	Illig T, Gieger C, Zhai G, RГ¶misch-Margl W, Wang-Sattler R, Prehn C, Altmaier E, KastenmГјller G, Kato BS, Mewes HW, Meitinger T, de Angelis MH, Kronenberg F, Soranzo N, Wichmann HE, Spector TD, Adamski J, Suhre K.	2010	20037589	PMC3773904		Variants (including SNPs and indels) imported from dbSNP
cardiovascular disease risk factors	DOID:1287	cardiovascular system disease	rs1260326	dbSNP	2	27508073	27508073	A genome-wide perspective of genetic variation in human metabolism.	Illig T, Gieger C, Zhai G, RГ¶misch-Margl W, Wang-Sattler R, Prehn C, Altmaier E, KastenmГјller G, Kato BS, Mewes HW, Meitinger T, de Angelis MH, Kronenberg F, Soranzo N, Wichmann HE, Spector TD, Adamski J, Suhre K.	2010	20037589	PMC3773904	association	Variants (including SNPs and indels) imported from dbSNP
atrial fibrillation	DOID:0060224	atrial fibrillation	rs242557	dbSNP	17	45942346	45942346	A genome-wide screening and SNPs-to-genes approach to identify novel genetic risk factors associated with frontotemporal dementia.	Ferrari R, Grassi M, Salvi E, Borroni B, Palluzzi F, Pepe D, D'Avila F, Padovani A, Archetti S, Rainero I, Rubino E, Pinessi L, Benussi L, Binetti G, Ghidoni R, Galimberti D, Scarpini E, Serpente M, Rossi G, Giaccone G, Tagliavini F, Nacmias B, Piaceri I,	2015	26154020	PMC4706156		Variants (including SNPs and indels) imported from dbSNP
atrial fibrillation	DOID:0060224	atrial fibrillation	rs242557	dbSNP	CHR_HSCHR17_1_CTG5	46155482	46155482	A genome-wide screening and SNPs-to-genes approach to identify novel genetic risk factors associated with frontotemporal dementia.	Ferrari R, Grassi M, Salvi E, Borroni B, Palluzzi F, Pepe D, D'Avila F, Padovani A, Archetti S, Rainero I, Rubino E, Pinessi L, Benussi L, Binetti G, Ghidoni R, Galimberti D, Scarpini E, Serpente M, Rossi G, Giaccone G, Tagliavini F, Nacmias B, Piaceri I,	2015	26154020	PMC4706156		Variants (including SNPs and indels) imported from dbSNP
atrial fibrillation	DOID:0060224	atrial fibrillation	rs242557	dbSNP	CHR_HSCHR17_2_CTG5	45953998	45953998	A genome-wide screening and SNPs-to-genes approach to identify novel genetic risk factors associated with frontotemporal dementia.	Ferrari R, Grassi M, Salvi E, Borroni B, Palluzzi F, Pepe D, D'Avila F, Padovani A, Archetti S, Rainero I, Rubino E, Pinessi L, Benussi L, Binetti G, Ghidoni R, Galimberti D, Scarpini E, Serpente M, Rossi G, Giaccone G, Tagliavini F, Nacmias B, Piaceri I,	2015	26154020	PMC4706156		Variants (including SNPs and indels) imported from dbSNP
cardiovascular disease risk factors	DOID:1287	cardiovascular system disease	rs2075650	dbSNP	19	44892362	44892362	A genome-wide screening and SNPs-to-genes approach to identify novel genetic risk factors associated with frontotemporal dementia.	Ferrari R, Grassi M, Salvi E, Borroni B, Palluzzi F, Pepe D, D'Avila F, Padovani A, Archetti S, Rainero I, Rubino E, Pinessi L, Benussi L, Binetti G, Ghidoni R, Galimberti D, Scarpini E, Serpente M, Rossi G, Giaccone G, Tagliavini F, Nacmias B, Piaceri I,	2015	26154020	PMC4706156		Variants (including SNPs and indels) imported from dbSNP
heart failure	DOID:114	heart disease	rs11136000	dbSNP	8	27607002	27607002	A genome-wide screening and SNPs-to-genes approach to identify novel genetic risk factors associated with frontotemporal dementia.	Ferrari R, Grassi M, Salvi E, Borroni B, Palluzzi F, Pepe D, D'Avila F, Padovani A, Archetti S, Rainero I, Rubino E, Pinessi L, Benussi L, Binetti G, Ghidoni R, Galimberti D, Scarpini E, Serpente M, Rossi G, Giaccone G, Tagliavini F, Nacmias B, Piaceri I,	2015	26154020	PMC4706156		Variants (including SNPs and indels) imported from dbSNP
cardiovascular phenotype	DOID:1287	cardiovascular system disease	rs397508104	dbSNP	11	2847859	2847865	A genome-wide survey of mutations in the Jurkat cell line.	Gioia L, Siddique A, Head SR, Salomon DR, Su AI.	2018	29739316	PMC5941560	likely pathogenic,pathogenic	Variants (including SNPs and indels) imported from dbSNP
cardiovascular phenotype	DOID:1287	cardiovascular system disease	rs397508104	dbSNP	CHR_HSCHR11_1_CTG7	2847837	2847843	A genome-wide survey of mutations in the Jurkat cell line.	Gioia L, Siddique A, Head SR, Salomon DR, Su AI.	2018	29739316	PMC5941560	likely pathogenic,pathogenic	Variants (including SNPs and indels) imported from dbSNP
cardiovascular phenotype	DOID:1287	cardiovascular system disease	rs25458	dbSNP	15	48505110	48505110	A genomewide association study of skin pigmentation in a South Asian population.	Stokowski RP, Pant PV, Dadd T, Fereday A, Hinds DA, Jarman C, Filsell W, Ginger RS, Green MR, van der Ouderaa FJ, Cox DR.	2007	17999355	PMC2276347	benign	Variants (including SNPs and indels) imported from dbSNP
cardiovascular phenotype	DOID:1287	cardiovascular system disease	rs363830	dbSNP	15	48428455	48428455	A genomewide association study of skin pigmentation in a South Asian population.	Stokowski RP, Pant PV, Dadd T, Fereday A, Hinds DA, Jarman C, Filsell W, Ginger RS, Green MR, van der Ouderaa FJ, Cox DR.	2007	17999355	PMC2276347	benign	Variants (including SNPs and indels) imported from dbSNP
cardiovascular phenotype	DOID:1287	cardiovascular system disease	rs363836	dbSNP	15	48430687	48430687	A genomewide association study of skin pigmentation in a South Asian population.	Stokowski RP, Pant PV, Dadd T, Fereday A, Hinds DA, Jarman C, Filsell W, Ginger RS, Green MR, van der Ouderaa FJ, Cox DR.	2007	17999355	PMC2276347	benign	Variants (including SNPs and indels) imported from dbSNP
heart failure	DOID:114	heart disease	rs885479	dbSNP	16	89919746	89919746	A genomewide association study of skin pigmentation in a South Asian population.	Stokowski RP, Pant PV, Dadd T, Fereday A, Hinds DA, Jarman C, Filsell W, Ginger RS, Green MR, van der Ouderaa FJ, Cox DR.	2007	17999355	PMC2276347	benign	Variants (including SNPs and indels) imported from dbSNP
cardiovascular phenotype	DOID:1287	cardiovascular system disease	rs13021201	dbSNP	2	178584404	178584404	A genomic case study of desmoplastic small round cell tumor: comprehensive analysis reveals insights into potential therapeutic targets and development of a monitoring tool for a rare and aggressive disease.	Ferreira EN, Barros BD, de Souza JE, Almeida RV, Torrezan GT, Garcia S, Krepischi AC, Mello CA, Cunha IW, Pinto CA, Soares FA, Dias-Neto E, Lopes A, de Souza SJ, Carraro DM.	2016	27863505	PMC5116179	benign,likely benign	Variants (including SNPs and indels) imported from dbSNP
cardiovascular phenotype	DOID:1287	cardiovascular system disease	rs55880440	dbSNP	2	178529132	178529132	A genomic case study of desmoplastic small round cell tumor: comprehensive analysis reveals insights into potential therapeutic targets and development of a monitoring tool for a rare and aggressive disease.	Ferreira EN, Barros BD, de Souza JE, Almeida RV, Torrezan GT, Garcia S, Krepischi AC, Mello CA, Cunha IW, Pinto CA, Soares FA, Dias-Neto E, Lopes A, de Souza SJ, Carraro DM.	2016	27863505	PMC5116179	uncertain significance,benign	Variants (including SNPs and indels) imported from dbSNP
cardiovascular disease	DOID:1287	cardiovascular system disease	rs6905288	dbSNP	6	43791136	43791136	A genomic exploration identifies mechanisms that may explain adverse cardiovascular effects of COX-2 inhibitors.	BrГ¦nne I, Willenborg C, Tragante V, Kessler T, Zeng L, Reiz B, Kleinecke M, von Ameln S, Willer CJ, Laakso M, Wild PS, Zeller T, Wallentin L, Franks PW, Salomaa V, Dehghan A, Meitinger T, Samani NJ, Asselbergs FW, Erdmann J, Schunkert H.	2017	28860667	PMC5579257		Variants (including SNPs and indels) imported from dbSNP
cardiovascular disease	DOID:1287	cardiovascular system disease	rs7412	dbSNP	19	44908822	44908822	A Genomics-Based Model for Prediction of Severe Bioprosthetic Mitral Valve Calcification.	Ponasenko AV, Khutornaya MV, Kutikhin AG, Rutkovskaya NV, Tsepokina AV, Kondyukova NV, Yuzhalin AE, Barbarash LS.	2016	27589735	PMC5037665	pathogenic,drug response,other	Variants (including SNPs and indels) imported from dbSNP
cardiovascular risk factors	DOID:1287	cardiovascular system disease	rs7412	dbSNP	19	44908822	44908822	A Genomics-Based Model for Prediction of Severe Bioprosthetic Mitral Valve Calcification.	Ponasenko AV, Khutornaya MV, Kutikhin AG, Rutkovskaya NV, Tsepokina AV, Kondyukova NV, Yuzhalin AE, Barbarash LS.	2016	27589735	PMC5037665	pathogenic,drug response,other	Variants (including SNPs and indels) imported from dbSNP
atrial fibrillation	DOID:0060224	atrial fibrillation	rs242557	dbSNP	17	45942346	45942346	A geographical cluster of progressive supranuclear palsy in northern France.	Caparros-Lefebvre D, Golbe LI, Deramecourt V, Maurage CA, Huin V, BuГ©e-Scherrer V, Obriot H, SablonniГЁre B, Caparros F, BuГ©e L, Lees AJ.	2015	26354981	PMC4617163		Variants (including SNPs and indels) imported from dbSNP
atrial fibrillation	DOID:0060224	atrial fibrillation	rs242557	dbSNP	CHR_HSCHR17_1_CTG5	46155482	46155482	A geographical cluster of progressive supranuclear palsy in northern France.	Caparros-Lefebvre D, Golbe LI, Deramecourt V, Maurage CA, Huin V, BuГ©e-Scherrer V, Obriot H, SablonniГЁre B, Caparros F, BuГ©e L, Lees AJ.	2015	26354981	PMC4617163		Variants (including SNPs and indels) imported from dbSNP
atrial fibrillation	DOID:0060224	atrial fibrillation	rs242557	dbSNP	CHR_HSCHR17_2_CTG5	45953998	45953998	A geographical cluster of progressive supranuclear palsy in northern France.	Caparros-Lefebvre D, Golbe LI, Deramecourt V, Maurage CA, Huin V, BuГ©e-Scherrer V, Obriot H, SablonniГЁre B, Caparros F, BuГ©e L, Lees AJ.	2015	26354981	PMC4617163		Variants (including SNPs and indels) imported from dbSNP
atrial fibrillation	DOID:0060224	atrial fibrillation	rs6843082	dbSNP	4	110796911	110796911	A global map for dissecting phenotypic variants in human lincRNAs.	Ning S, Wang P, Ye J, Li X, Li R, Zhao Z, Huo X, Wang L, Li F, Li X.	2013	23463026	PMC3778363		Variants (including SNPs and indels) imported from dbSNP
atrial fibrillation	DOID:0060224	atrial fibrillation	rs2200733	dbSNP	4	110789013	110789013	A global map for dissecting phenotypic variants in human lincRNAs.	Ning S, Wang P, Ye J, Li X, Li R, Zhao Z, Huo X, Wang L, Li F, Li X.	2013	23463026	PMC3778363		Variants (including SNPs and indels) imported from dbSNP
atrial fibrillation	DOID:0060224	atrial fibrillation	rs2220427	dbSNP	4	110793733	110793733	A global map for dissecting phenotypic variants in human lincRNAs.	Ning S, Wang P, Ye J, Li X, Li R, Zhao Z, Huo X, Wang L, Li F, Li X.	2013	23463026	PMC3778363		Variants (including SNPs and indels) imported from dbSNP
atrial fibrillation	DOID:0060224	atrial fibrillation	rs17042171	dbSNP	4	110787131	110787131	A global map for dissecting phenotypic variants in human lincRNAs.	Ning S, Wang P, Ye J, Li X, Li R, Zhao Z, Huo X, Wang L, Li F, Li X.	2013	23463026	PMC3778363		Variants (including SNPs and indels) imported from dbSNP
atrial fibrillation/atrial flutter	DOID:0050650	familial atrial fibrillation	rs2200733	dbSNP	4	110789013	110789013	A global map for dissecting phenotypic variants in human lincRNAs.	Ning S, Wang P, Ye J, Li X, Li R, Zhao Z, Huo X, Wang L, Li F, Li X.	2013	23463026	PMC3778363		Variants (including SNPs and indels) imported from dbSNP
cardiovascular disease	DOID:1287	cardiovascular system disease	rs1229984	dbSNP	4	99318162	99318162	A global perspective on genetic variation at the ADH genes reveals unusual patterns of linkage disequilibrium and diversity.	Osier MV, Pakstis AJ, Soodyall H, Comas D, Goldman D, Odunsi A, Okonofua F, Parnas J, Schulz LO, Bertranpetit J, Bonne-Tamir B, Lu RB, Kidd JR, Kidd KK.	2002	12050823	PMC384995	protective	Variants (including SNPs and indels) imported from dbSNP
heart failure	DOID:114	heart disease	rs885479	dbSNP	16	89919746	89919746	A GWAS in Latin Americans highlights the convergent evolution of lighter skin pigmentation in Eurasia.	Adhikari K, Mendoza-Revilla J, Sohail A, Fuentes-Guajardo M, Lampert J, ChacГіn-Duque JC, Hurtado M, Villegas V, Granja V, AcuГ±a-Alonzo V, Jaramillo C, Arias W, Lozano RB, Everardo P, GГіmez-ValdГ©s J, Villamil-RamГ­rez H, Silva de Cerqueira CC, Hunemeier T,	2019	30664655	PMC6341102	benign	Variants (including SNPs and indels) imported from dbSNP
cardiovascular disease	DOID:1287	cardiovascular system disease	rs1229984	dbSNP	4	99318162	99318162	A haplotype map of the human genome.	International HapMap Consortium.	2005	16255080	PMC1880871	protective	Variants (including SNPs and indels) imported from dbSNP
cardiovascular disease	DOID:1287	cardiovascular system disease	rs17608766	dbSNP	17	46935905	46935905	A haplotype of the GOSR2 gene is associated with essential hypertension in Japanese men.	Pan S, Nakayama T, Sato N, Izumi Y, Soma M, Aoi N, Ma Y.	2013	23313660			Variants (including SNPs and indels) imported from dbSNP
cardiovascular disease	DOID:1287	cardiovascular system disease	rs17608766	dbSNP	17	46935905	46935905	A haplotype of the GOSR2 gene is associated with myocardial infarction in Japanese men.	Pan S, Nakayama T, Sato N, Izumi Y, Soma M, Aoi N, Ma Y, Hinohara S, Doba N.	2013	23675987	PMC3668501		Variants (including SNPs and indels) imported from dbSNP
cardiovascular disease risk factors	DOID:1287	cardiovascular system disease	rs1800562	dbSNP	6	26092913	26092913	A hemochromatosis-causing mutation C282Y is a risk factor for proliferative diabetic retinopathy in Caucasians with type 2 diabetes.	Peterlin B, Globocnik Petrovic M, Makuc J, Hawlina M, Petrovic D.	2003	14618419		uncertain significance,pathogenic,risk factor,association	Variants (including SNPs and indels) imported from dbSNP
cardiovascular phenotype	DOID:1287	cardiovascular system disease	rs121913637	dbSNP	14	23425971	23425971	A high risk phenotype of hypertrophic cardiomyopathy associated with a compound genotype of two mutated beta-myosin heavy chain genes.	Jeschke B, Uhl K, Weist B, SchrГ¶der D, Meitinger T, DГ¶hlemann C, Vosberg HP.	1998	9544842		pathogenic	Variants (including SNPs and indels) imported from dbSNP
cardiovascular phenotype	DOID:1287	cardiovascular system disease	rs121913640	dbSNP	14	23429867	23429867	A high risk phenotype of hypertrophic cardiomyopathy associated with a compound genotype of two mutated beta-myosin heavy chain genes.	Jeschke B, Uhl K, Weist B, SchrГ¶der D, Meitinger T, DГ¶hlemann C, Vosberg HP.	1998	9544842		uncertain significance,pathogenic	Variants (including SNPs and indels) imported from dbSNP
familial hypertrophic cardiomyopathy 1	DOID:0080326	familial hypertrophic cardiomyopathy	rs121913637	dbSNP	14	23425971	23425971	A high risk phenotype of hypertrophic cardiomyopathy associated with a compound genotype of two mutated beta-myosin heavy chain genes.	Jeschke B, Uhl K, Weist B, SchrГ¶der D, Meitinger T, DГ¶hlemann C, Vosberg HP.	1998	9544842		pathogenic	Variants (including SNPs and indels) imported from dbSNP
familial hypertrophic cardiomyopathy 1	DOID:0080326	familial hypertrophic cardiomyopathy	rs121913640	dbSNP	14	23429867	23429867	A high risk phenotype of hypertrophic cardiomyopathy associated with a compound genotype of two mutated beta-myosin heavy chain genes.	Jeschke B, Uhl K, Weist B, SchrГ¶der D, Meitinger T, DГ¶hlemann C, Vosberg HP.	1998	9544842		uncertain significance,pathogenic	Variants (including SNPs and indels) imported from dbSNP
atrial fibrillation	DOID:0060224	atrial fibrillation	rs7374540	dbSNP	3	38592651	38592651	A high-density association screen of 155 ion transport genes for involvement with common migraine.	Nyholt DR, LaForge KS, Kallela M, Alakurtti K, Anttila V, FГ¤rkkilГ¤ M, HГ¤malГ¤inen E, Kaprio J, Kaunisto MA, Heath AC, Montgomery GW, GГ¶bel H, Todt U, Ferrari MD, Launer LJ, Frants RR, Terwindt GM, de Vries B, Verschuren WM, Brand J, Freilinger T, Pfaffenra	2008	18676988	PMC2566523		Variants (including SNPs and indels) imported from dbSNP
heart rate	DOID:10273	heart conduction disease	rs1998822	dbSNP	10	18466735	18466735	A high-density association screen of 155 ion transport genes for involvement with common migraine.	Nyholt DR, LaForge KS, Kallela M, Alakurtti K, Anttila V, FГ¤rkkilГ¤ M, HГ¤malГ¤inen E, Kaprio J, Kaunisto MA, Heath AC, Montgomery GW, GГ¶bel H, Todt U, Ferrari MD, Launer LJ, Frants RR, Terwindt GM, de Vries B, Verschuren WM, Brand J, Freilinger T, Pfaffenra	2008	18676988	PMC2566523		Variants (including SNPs and indels) imported from dbSNP
cardiovascular phenotype	DOID:1287	cardiovascular system disease	rs120074190	dbSNP	11	2778009	2778009	A history of stressful life events, prolonged mental stress and arrhythmic events in inherited long QT syndrome.	Hintsa T, Puttonen S, Toivonen L, Kontula K, Swan H, Keltikangas-JГ¤rvinen L.	2010	20659946		not provided,pathogenic	Variants (including SNPs and indels) imported from dbSNP
cardiovascular phenotype	DOID:1287	cardiovascular system disease	rs120074190	dbSNP	CHR_HSCHR11_1_CTG7	2778009	2778009	A history of stressful life events, prolonged mental stress and arrhythmic events in inherited long QT syndrome.	Hintsa T, Puttonen S, Toivonen L, Kontula K, Swan H, Keltikangas-JГ¤rvinen L.	2010	20659946		not provided,pathogenic	Variants (including SNPs and indels) imported from dbSNP
cardiovascular disease	DOID:1287	cardiovascular system disease	rs7412	dbSNP	19	44908822	44908822	A homopolymer polymorphism in the TOMM40 gene contributes to cognitive performance in aging.	Hayden KM, McEvoy JM, Linnertz C, Attix D, Kuchibhatla M, Saunders AM, Lutz MW, Welsh-Bohmer KA, Roses AD, Chiba-Falek O.	2012	22863908	PMC3438346	pathogenic,drug response,other	Variants (including SNPs and indels) imported from dbSNP
cardiovascular risk factors	DOID:1287	cardiovascular system disease	rs7412	dbSNP	19	44908822	44908822	A homopolymer polymorphism in the TOMM40 gene contributes to cognitive performance in aging.	Hayden KM, McEvoy JM, Linnertz C, Attix D, Kuchibhatla M, Saunders AM, Lutz MW, Welsh-Bohmer KA, Roses AD, Chiba-Falek O.	2012	22863908	PMC3438346	pathogenic,drug response,other	Variants (including SNPs and indels) imported from dbSNP
cardiovascular phenotype	DOID:1287	cardiovascular system disease	rs60890628	dbSNP	1	156138507	156138507	A homozygous mutation in the lamin A/C gene associated with a novel syndrome of arthropathy, tendinous calcinosis, and progeroid features.	Van Esch H, Agarwal AK, Debeer P, Fryns JP, Garg A.	2006	16278265		uncertain significance,pathogenic	Variants (including SNPs and indels) imported from dbSNP
cardiomyopathy	DOID:0050700	cardiomyopathy	rs41313301	dbSNP	9	105635214	105635214	A homozygous nonsense mutation in the fukutin gene causes a Walker-Warburg syndrome phenotype.	de BernabГ© DB, van Bokhoven H, van Beusekom E, Van den Akker W, Kant S, Dobyns WB, Cormand B, Currier S, Hamel B, Talim B, Topaloglu H, Brunner HG.	2003	14627679	PMC1735302	benign	Variants (including SNPs and indels) imported from dbSNP
cardiovascular phenotype	DOID:1287	cardiovascular system disease	rs41313301	dbSNP	9	105635214	105635214	A homozygous nonsense mutation in the fukutin gene causes a Walker-Warburg syndrome phenotype.	de BernabГ© DB, van Bokhoven H, van Beusekom E, Van den Akker W, Kant S, Dobyns WB, Cormand B, Currier S, Hamel B, Talim B, Topaloglu H, Brunner HG.	2003	14627679	PMC1735302	benign	Variants (including SNPs and indels) imported from dbSNP
cardiac conduction defect nonspecific	DOID:10273	heart conduction disease	rs199473073	dbSNP	3	38613757	38613757	A homozygous SCN5A mutation in a severe, recessive type of cardiac conduction disease.	Neu A, Eiselt M, Paul M, Sauter K, Stallmeyer B, Isbrandt D, Schulze-Bahr E.	2010	20564468		uncertain significance,not provided,likely pathogenic	Variants (including SNPs and indels) imported from dbSNP
cardiomyopathy	DOID:0050700	cardiomyopathy	rs76992529	dbSNP	18	31598655	31598655	A homozygous transthyretin variant associated with senile systemic amyloidosis: evidence for a late-onset disease of genetic etiology.	Jacobson DR, Gorevic PD, Buxbaum JN.	1990	2349941	PMC1683748	pathogenic	Variants (including SNPs and indels) imported from dbSNP
cardiovascular phenotype	DOID:1287	cardiovascular system disease	rs76992529	dbSNP	18	31598655	31598655	A homozygous transthyretin variant associated with senile systemic amyloidosis: evidence for a late-onset disease of genetic etiology.	Jacobson DR, Gorevic PD, Buxbaum JN.	1990	2349941	PMC1683748	pathogenic	Variants (including SNPs and indels) imported from dbSNP
cardiac arrest	DOID:0060319	cardiac arrest	rs370890951	dbSNP	11	47332912	47332912	A human MYBPC3 mutation appearing about 10 centuries ago results in a hypertrophic cardiomyopathy with delayed onset, moderate evolution but with a risk of sudden death.	Teirlinck CH, Senni F, Malti RE, Majoor-Krakauer D, Fellmann F, Millat G, AndrГ©-FouГ«t X, Pernot F, Stumpf M, Boutarin J, Bouvagnet P.	2012	23140321	PMC3549277	likely benign	Variants (including SNPs and indels) imported from dbSNP
cardiomyopathy	DOID:0050700	cardiomyopathy	rs370890951	dbSNP	11	47332912	47332912	A human MYBPC3 mutation appearing about 10 centuries ago results in a hypertrophic cardiomyopathy with delayed onset, moderate evolution but with a risk of sudden death.	Teirlinck CH, Senni F, Malti RE, Majoor-Krakauer D, Fellmann F, Millat G, AndrГ©-FouГ«t X, Pernot F, Stumpf M, Boutarin J, Bouvagnet P.	2012	23140321	PMC3549277	likely benign	Variants (including SNPs and indels) imported from dbSNP
cardiovascular phenotype	DOID:1287	cardiovascular system disease	rs370890951	dbSNP	11	47332912	47332912	A human MYBPC3 mutation appearing about 10 centuries ago results in a hypertrophic cardiomyopathy with delayed onset, moderate evolution but with a risk of sudden death.	Teirlinck CH, Senni F, Malti RE, Majoor-Krakauer D, Fellmann F, Millat G, AndrГ©-FouГ«t X, Pernot F, Stumpf M, Boutarin J, Bouvagnet P.	2012	23140321	PMC3549277	likely benign	Variants (including SNPs and indels) imported from dbSNP
cardiovascular phenotype	DOID:1287	cardiovascular system disease	rs397515937	dbSNP	11	47339792	47339792	A human MYBPC3 mutation appearing about 10 centuries ago results in a hypertrophic cardiomyopathy with delayed onset, moderate evolution but with a risk of sudden death.	Teirlinck CH, Senni F, Malti RE, Majoor-Krakauer D, Fellmann F, Millat G, AndrГ©-FouГ«t X, Pernot F, Stumpf M, Boutarin J, Bouvagnet P.	2012	23140321	PMC3549277	pathogenic	Variants (including SNPs and indels) imported from dbSNP
familial hypertrophic cardiomyopathy 4	DOID:0080326	familial hypertrophic cardiomyopathy	rs397515937	dbSNP	11	47339792	47339792	A human MYBPC3 mutation appearing about 10 centuries ago results in a hypertrophic cardiomyopathy with delayed onset, moderate evolution but with a risk of sudden death.	Teirlinck CH, Senni F, Malti RE, Majoor-Krakauer D, Fellmann F, Millat G, AndrГ©-FouГ«t X, Pernot F, Stumpf M, Boutarin J, Bouvagnet P.	2012	23140321	PMC3549277	pathogenic	Variants (including SNPs and indels) imported from dbSNP
cardiovascular disease	DOID:1287	cardiovascular system disease	rs2681492	dbSNP	12	89619312	89619312	A Hybrid Bayesian Network/Structural Equation (BN/SEM) Modeling Approach for Detecting Physiological Networks for Obesity-related Genetic Variants.	Duarte CW, Klimentidis YC, Harris JJ, Cardel M, FernГЎndez JR.	2011	22318170	PMC3272699		Variants (including SNPs and indels) imported from dbSNP
cardiovascular phenotype	DOID:1287	cardiovascular system disease	rs140598	dbSNP	15	48487333	48487333	A Japanese-specific allele in the GALNT11 gene.	Yuasa I, Umetsu K, Matsusue A, Nishimukai H, Harihara S, Fukumori Y, Saitou N, Jin F, Chattopadhyay PK, Henke L, Henke J.	2010	20547088		benign	Variants (including SNPs and indels) imported from dbSNP
atrial fibrillation familial 3	DOID:0050650	familial atrial fibrillation	rs199472709	dbSNP	11	2572021	2572021	A KCNQ1 mutation causes a high penetrance for familial atrial fibrillation.	Bartos DC, Anderson JB, Bastiaenen R, Johnson JN, Gollob MH, Tester DJ, Burgess DE, Homfray T, Behr ER, Ackerman MJ, Guicheney P, Delisle BP.	2013	23350853	PMC3640728	not provided,likely pathogenic,pathogenic	Variants (including SNPs and indels) imported from dbSNP
cardiovascular phenotype	DOID:1287	cardiovascular system disease	rs199472709	dbSNP	11	2572021	2572021	A KCNQ1 mutation causes a high penetrance for familial atrial fibrillation.	Bartos DC, Anderson JB, Bastiaenen R, Johnson JN, Gollob MH, Tester DJ, Burgess DE, Homfray T, Behr ER, Ackerman MJ, Guicheney P, Delisle BP.	2013	23350853	PMC3640728	not provided,likely pathogenic,pathogenic	Variants (including SNPs and indels) imported from dbSNP
cardiovascular phenotype	DOID:1287	cardiovascular system disease	rs151344631	dbSNP	11	2571333	2571333	A KCNQ1 V205M missense mutation causes a high rate of long QT syndrome in a First Nations community of northern British Columbia: a community-based approach to understanding the impact.	Arbour L, Rezazadeh S, Eldstrom J, Weget-Simms G, Rupps R, Dyer Z, Tibbits G, Accili E, Casey B, Kmetic A, Sanatani S, Fedida D.	2008	18580685		not provided,pathogenic	Variants (including SNPs and indels) imported from dbSNP
atrial fibrillation	DOID:0060224	atrial fibrillation	rs147750704	dbSNP	17	70175316	70175316	A Kir2.1 gain-of-function mutation underlies familial atrial fibrillation.	Xia M, Jin Q, Bendahhou S, He Y, Larroque MM, Chen Y, Zhou Q, Yang Y, Liu Y, Liu B, Zhu Q, Zhou Y, Lin J, Liang B, Li L, Dong X, Pan Z, Wang R, Wan H, Qiu W, Xu W, Eurlings P, Barhanin J, Chen Y.	2005	15922306		uncertain significance,likely pathogenic	Variants (including SNPs and indels) imported from dbSNP
atrial fibrillation familial 9	DOID:0050650	familial atrial fibrillation	rs147750704	dbSNP	17	70175316	70175316	A Kir2.1 gain-of-function mutation underlies familial atrial fibrillation.	Xia M, Jin Q, Bendahhou S, He Y, Larroque MM, Chen Y, Zhou Q, Yang Y, Liu Y, Liu B, Zhu Q, Zhou Y, Lin J, Liang B, Li L, Dong X, Pan Z, Wang R, Wan H, Qiu W, Xu W, Eurlings P, Barhanin J, Chen Y.	2005	15922306		uncertain significance,likely pathogenic	Variants (including SNPs and indels) imported from dbSNP
cardio-facio-cutaneous syndrome	DOID:0060233	cardiofaciocutaneous syndrome	rs61764370	dbSNP	12	25207290	25207290	A KRAS variant is a biomarker of poor outcome, platinum chemotherapy resistance and a potential target for therapy in ovarian cancer.	Ratner ES, Keane FK, Lindner R, Tassi RA, Paranjape T, Glasgow M, Nallur S, Deng Y, Lu L, Steele L, Sand S, Muller RU, Bignotti E, Bellone S, Boeke M, Yao X, Pecorelli S, Ravaggi A, Katsaros D, Zelterman D, Cristea MC, Yu H, Rutherford TJ, Weitzel JN, Neu	2012	22139083	PMC3342446	likely benign	Variants (including SNPs and indels) imported from dbSNP
cardio-facio-cutaneous syndrome	DOID:0060233	cardiofaciocutaneous syndrome	rs61764370	dbSNP	12	25207290	25207290	A KRAS-variant in ovarian cancer acts as a genetic marker of cancer risk.	Ratner E, Lu L, Boeke M, Barnett R, Nallur S, Chin LJ, Pelletier C, Blitzblau R, Tassi R, Paranjape T, Hui P, Godwin AK, Yu H, Risch H, Rutherford T, Schwartz P, Santin A, Matloff E, Zelterman D, Slack FJ, Weidhaas JB.	2010	20647319	PMC2923587	likely benign	Variants (including SNPs and indels) imported from dbSNP
cardiovascular phenotype	DOID:1287	cardiovascular system disease	rs3733617	dbSNP	4	113357121	113357121	A large candidate gene survey identifies the KCNE1 D85N polymorphism as a possible modulator of drug-induced torsades de pointes.	KГ¤Г¤b S, Crawford DC, Sinner MF, Behr ER, Kannankeril PJ, Wilde AA, Bezzina CR, Schulze-Bahr E, Guicheney P, Bishopric NH, Myerburg RJ, Schott JJ, Pfeufer A, Beckmann BM, Martens E, Zhang T, Stallmeyer B, Zumhagen S, Denjoy I, Bardai A, Van Gelder IC, Jams	2012	22100668	PMC3288202	benign,likely benign	Variants (including SNPs and indels) imported from dbSNP
cardiovascular phenotype	DOID:1287	cardiovascular system disease	rs1805128	dbSNP	21	34449382	34449382	A large candidate gene survey identifies the KCNE1 D85N polymorphism as a possible modulator of drug-induced torsades de pointes.	KГ¤Г¤b S, Crawford DC, Sinner MF, Behr ER, Kannankeril PJ, Wilde AA, Bezzina CR, Schulze-Bahr E, Guicheney P, Bishopric NH, Myerburg RJ, Schott JJ, Pfeufer A, Beckmann BM, Martens E, Zhang T, Stallmeyer B, Zumhagen S, Denjoy I, Bardai A, Van Gelder IC, Jams	2012	22100668	PMC3288202	likely benign,pathogenic,risk factor	Variants (including SNPs and indels) imported from dbSNP
cardiovascular phenotype	DOID:1287	cardiovascular system disease	rs9493627	dbSNP	6	133468590	133468590	A Large Genome-Wide Association Study of Age-Related Hearing Impairment Using Electronic Health Records.	Hoffmann TJ, Keats BJ, Yoshikawa N, Schaefer C, Risch N, Lustig LR.	2016	27764096	PMC5072625	uncertain significance,benign,likely benign	Variants (including SNPs and indels) imported from dbSNP
cardiovascular disease	DOID:1287	cardiovascular system disease	rs7412	dbSNP	19	44908822	44908822	A large study reveals no association between APOE and Parkinson's disease.	Federoff M, Jimenez-Rolando B, Nalls MA, Singleton AB.	2012	22349451	PMC3323723	pathogenic,drug response,other	Variants (including SNPs and indels) imported from dbSNP
cardiovascular risk factors	DOID:1287	cardiovascular system disease	rs7412	dbSNP	19	44908822	44908822	A large study reveals no association between APOE and Parkinson's disease.	Federoff M, Jimenez-Rolando B, Nalls MA, Singleton AB.	2012	22349451	PMC3323723	pathogenic,drug response,other	Variants (including SNPs and indels) imported from dbSNP
cardiovascular disease	DOID:1287	cardiovascular system disease	rs7412	dbSNP	19	44908822	44908822	A large-scale candidate gene association study of age at menarche and age at natural menopause.	He C, Kraft P, Chasman DI, Buring JE, Chen C, Hankinson SE, ParГ© G, Chanock S, Ridker PM, Hunter DJ.	2010	20734064	PMC2967297	pathogenic,drug response,other	Variants (including SNPs and indels) imported from dbSNP
cardiovascular risk factors	DOID:1287	cardiovascular system disease	rs7412	dbSNP	19	44908822	44908822	A large-scale candidate gene association study of age at menarche and age at natural menopause.	He C, Kraft P, Chasman DI, Buring JE, Chen C, Hankinson SE, ParГ© G, Chanock S, Ridker PM, Hunter DJ.	2010	20734064	PMC2967297	pathogenic,drug response,other	Variants (including SNPs and indels) imported from dbSNP
atrial fibrillation	DOID:0060224	atrial fibrillation	rs9899183	dbSNP	17	7549660	7549660	A Large-Scale Multi-ancestry Genome-wide Study Accounting for Smoking Behavior Identifies Multiple Significant Loci for Blood Pressure.	Sung YJ, Winkler TW, de Las Fuentes L, Bentley AR, Brown MR, Kraja AT, Schwander K, Ntalla I, Guo X, Franceschini N, Lu Y, Cheng CY, Sim X, Vojinovic D, Marten J, Musani SK, Li C, Feitosa MF, KilpelГ¤inen TO, Richard MA, Noordam R, Aslibekyan S, Aschard H,	2018	29455858	PMC5985266		Variants (including SNPs and indels) imported from dbSNP
cardiovascular disease	DOID:1287	cardiovascular system disease	rs1801253	dbSNP	10	114045297	114045297	A Large-Scale Multi-ancestry Genome-wide Study Accounting for Smoking Behavior Identifies Multiple Significant Loci for Blood Pressure.	Sung YJ, Winkler TW, de Las Fuentes L, Bentley AR, Brown MR, Kraja AT, Schwander K, Ntalla I, Guo X, Franceschini N, Lu Y, Cheng CY, Sim X, Vojinovic D, Marten J, Musani SK, Li C, Feitosa MF, KilpelГ¤inen TO, Richard MA, Noordam R, Aslibekyan S, Aschard H,	2018	29455858	PMC5985266	drug response	Variants (including SNPs and indels) imported from dbSNP
cardiovascular disease	DOID:1287	cardiovascular system disease	rs74439044	dbSNP	17	7877701	7877701	A Large-Scale Multi-ancestry Genome-wide Study Accounting for Smoking Behavior Identifies Multiple Significant Loci for Blood Pressure.	Sung YJ, Winkler TW, de Las Fuentes L, Bentley AR, Brown MR, Kraja AT, Schwander K, Ntalla I, Guo X, Franceschini N, Lu Y, Cheng CY, Sim X, Vojinovic D, Marten J, Musani SK, Li C, Feitosa MF, KilpelГ¤inen TO, Richard MA, Noordam R, Aslibekyan S, Aschard H,	2018	29455858	PMC5985266		Variants (including SNPs and indels) imported from dbSNP
cardiovascular disease	DOID:1287	cardiovascular system disease	rs3184504	dbSNP	12	111446804	111446804	A Large-Scale Multi-ancestry Genome-wide Study Accounting for Smoking Behavior Identifies Multiple Significant Loci for Blood Pressure.	Sung YJ, Winkler TW, de Las Fuentes L, Bentley AR, Brown MR, Kraja AT, Schwander K, Ntalla I, Guo X, Franceschini N, Lu Y, Cheng CY, Sim X, Vojinovic D, Marten J, Musani SK, Li C, Feitosa MF, KilpelГ¤inen TO, Richard MA, Noordam R, Aslibekyan S, Aschard H,	2018	29455858	PMC5985266		Variants (including SNPs and indels) imported from dbSNP
cardiovascular disease	DOID:1287	cardiovascular system disease	rs72656645	dbSNP	12	12728121	12728121	A Large-Scale Multi-ancestry Genome-wide Study Accounting for Smoking Behavior Identifies Multiple Significant Loci for Blood Pressure.	Sung YJ, Winkler TW, de Las Fuentes L, Bentley AR, Brown MR, Kraja AT, Schwander K, Ntalla I, Guo X, Franceschini N, Lu Y, Cheng CY, Sim X, Vojinovic D, Marten J, Musani SK, Li C, Feitosa MF, KilpelГ¤inen TO, Richard MA, Noordam R, Aslibekyan S, Aschard H,	2018	29455858	PMC5985266		Variants (including SNPs and indels) imported from dbSNP
cardio-facio-cutaneous syndrome	DOID:0060233	cardiofaciocutaneous syndrome	rs712	dbSNP	12	25209618	25209618	A let-7 binding site polymorphism rs712 in the KRAS 3' UTR is associated with an increased risk of gastric cancer.	Li ZH, Pan XM, Han BW, Guo XM, Zhang Z, Jia J, Gao LB.	2013	23729275		likely benign	Variants (including SNPs and indels) imported from dbSNP
cardio-facio-cutaneous syndrome	DOID:0060233	cardiofaciocutaneous syndrome	rs712	dbSNP	12	25209618	25209618	A let-7 KRAS rs712 polymorphism increases colorectal cancer risk.	Pan XM, Sun RF, Li ZH, Guo XM, Zhang Z, Qin HJ, Xu GH, Gao LB.	2014	23975373		likely benign	Variants (including SNPs and indels) imported from dbSNP
cardio-facio-cutaneous syndrome	DOID:0060233	cardiofaciocutaneous syndrome	rs61764370	dbSNP	12	25207290	25207290	A let-7 microRNA binding site polymorphism in the KRAS 3'UTR is associated with increased risk and reduced survival for gallbladder cancer in North Indian population.	Kazmi HR, Chandra A, Kumar S, Satyam LK, Gupta A, Nigam J, Srivastava M, Mittal B.	2016	27620744		likely benign	Variants (including SNPs and indels) imported from dbSNP
cardio-facio-cutaneous syndrome	DOID:0060233	cardiofaciocutaneous syndrome	rs61764370	dbSNP	12	25207290	25207290	A let-7 microRNA-binding site polymorphism in KRAS predicts improved outcome in patients with metastatic colorectal cancer treated with salvage cetuximab/panitumumab monotherapy.	Saridaki Z, Weidhaas JB, Lenz HJ, Laurent-Puig P, Jacobs B, De Schutter J, De Roock W, Salzman DW, Zhang W, Yang D, Pilati C, BouchГ© O, Piessevaux H, Tejpar S.	2014	25183481	PMC4155520	likely benign	Variants (including SNPs and indels) imported from dbSNP
cardio-facio-cutaneous syndrome	DOID:0060233	cardiofaciocutaneous syndrome	rs61764370	dbSNP	12	25207290	25207290	A LIN28B polymorphism predicts for colon cancer survival.	Ye Y, Madison B, Wu X, Rustgi AK.	2012	23052130	PMC3542229	likely benign	Variants (including SNPs and indels) imported from dbSNP
cardiovascular disease	DOID:1287	cardiovascular system disease	rs7412	dbSNP	19	44908822	44908822	A loss of function variant in CASP7 protects against Alzheimer's disease in homozygous APOE ?4 allele carriers.	Ayers KL, Mirshahi UL, Wardeh AH, Murray MF, Hao K, Glicksberg BS, Li S, Carey DJ, Chen R.	2016	27358062	PMC4928152	pathogenic,drug response,other	Variants (including SNPs and indels) imported from dbSNP
cardiovascular risk factors	DOID:1287	cardiovascular system disease	rs7412	dbSNP	19	44908822	44908822	A loss of function variant in CASP7 protects against Alzheimer's disease in homozygous APOE ?4 allele carriers.	Ayers KL, Mirshahi UL, Wardeh AH, Murray MF, Hao K, Glicksberg BS, Li S, Carey DJ, Chen R.	2016	27358062	PMC4928152	pathogenic,drug response,other	Variants (including SNPs and indels) imported from dbSNP
cardiovascular phenotype	DOID:1287	cardiovascular system disease	rs41298838	dbSNP	22	19765921	19765921	A loss-of-function mutation p.T52S in RIPPLY3 is a potential predisposing genetic risk factor for Chinese Han conotruncal heart defect patients without the 22q11.2 deletion/duplication.	Hong N, Zhang E, Wang Q, Zhang X, Li F, Fu Q, Xu R, Yu Y, Chen S, Xu Y, Sun K.	2018	30241482	PMC6151064	uncertain significance,benign	Variants (including SNPs and indels) imported from dbSNP
cardiovascular phenotype	DOID:1287	cardiovascular system disease	rs72646967	dbSNP	22	19766568	19766568	A loss-of-function mutation p.T52S in RIPPLY3 is a potential predisposing genetic risk factor for Chinese Han conotruncal heart defect patients without the 22q11.2 deletion/duplication.	Hong N, Zhang E, Wang Q, Zhang X, Li F, Fu Q, Xu R, Yu Y, Chen S, Xu Y, Sun K.	2018	30241482	PMC6151064	benign	Variants (including SNPs and indels) imported from dbSNP
cardiovascular phenotype	DOID:1287	cardiovascular system disease	rs371898076	dbSNP	14	23426833	23426833	A low prevalence of MYH7/MYBPC3 mutations among familial hypertrophic cardiomyopathy patients in India.	Bashyam MD, Purushotham G, Chaudhary AK, Rao KM, Acharya V, Mohammad TA, Nagarajaram HA, Hariram V, Narasimhan C.	2012	21959974		pathogenic	Variants (including SNPs and indels) imported from dbSNP
familial hypertrophic cardiomyopathy 1	DOID:0080326	familial hypertrophic cardiomyopathy	rs371898076	dbSNP	14	23426833	23426833	A low prevalence of MYH7/MYBPC3 mutations among familial hypertrophic cardiomyopathy patients in India.	Bashyam MD, Purushotham G, Chaudhary AK, Rao KM, Acharya V, Mohammad TA, Nagarajaram HA, Hariram V, Narasimhan C.	2012	21959974		pathogenic	Variants (including SNPs and indels) imported from dbSNP
familial hypertrophic cardiomyopathy 4	DOID:0080326	familial hypertrophic cardiomyopathy	rs374852831	dbSNP	11	47341984	47341984	A low prevalence of MYH7/MYBPC3 mutations among familial hypertrophic cardiomyopathy patients in India.	Bashyam MD, Purushotham G, Chaudhary AK, Rao KM, Acharya V, Mohammad TA, Nagarajaram HA, Hariram V, Narasimhan C.	2012	21959974		benign,likely benign	Variants (including SNPs and indels) imported from dbSNP
cardiomyopathy	DOID:0050700	cardiomyopathy	rs397516089	dbSNP	14	23429807	23429807	A low prevalence of sarcomeric gene variants in a Chinese cohort with left ventricular non-compaction.	Tian T, Wang J, Wang H, Sun K, Wang Y, Jia L, Zou Y, Hui R, Zhou X, Song L.	2015	24691700		uncertain significance,likely pathogenic,pathogenic	Variants (including SNPs and indels) imported from dbSNP
cardiovascular phenotype	DOID:1287	cardiovascular system disease	rs397516089	dbSNP	14	23429807	23429807	A low prevalence of sarcomeric gene variants in a Chinese cohort with left ventricular non-compaction.	Tian T, Wang J, Wang H, Sun K, Wang Y, Jia L, Zou Y, Hui R, Zhou X, Song L.	2015	24691700		uncertain significance,likely pathogenic,pathogenic	Variants (including SNPs and indels) imported from dbSNP
cardiovascular phenotype	DOID:1287	cardiovascular system disease	rs1139793	dbSNP	22	19880695	19880695	A low selenium level is associated with lung and laryngeal cancers.	Jaworska K, Gupta S, Durda K, Muszy?ska M, Sukiennicki G, Jaworowska E, Grodzki T, Sulikowski M, Waloszczyk P, WГіjcik J, Lubi?ski J, Cybulski C, D?bniak T, Lener M, Morawski AW, Krzystolik K, Narod SA, Sun P, Lubi?ski J, Jakubowska A.	2013	23516596	PMC3596323	benign	Variants (including SNPs and indels) imported from dbSNP
cardiovascular phenotype	DOID:1287	cardiovascular system disease	rs121913641	dbSNP	14	23425970	23425970	A malignant phenotype of hypertrophic cardiomyopathy caused by Arg719Gln cardiac beta-myosin heavy-chain mutation in a Chinese family.	Huang X, Song L, Ma AQ, Gao J, Zheng W, Zhou X, Zhang Q, Lu H, Li Y, Liu Y, Hui R.	2001	11498078		uncertain significance,likely pathogenic,pathogenic	Variants (including SNPs and indels) imported from dbSNP
familial hypertrophic cardiomyopathy 1	DOID:0080326	familial hypertrophic cardiomyopathy	rs121913641	dbSNP	14	23425970	23425970	A malignant phenotype of hypertrophic cardiomyopathy caused by Arg719Gln cardiac beta-myosin heavy-chain mutation in a Chinese family.	Huang X, Song L, Ma AQ, Gao J, Zheng W, Zhou X, Zhang Q, Lu H, Li Y, Liu Y, Hui R.	2001	11498078		uncertain significance,likely pathogenic,pathogenic	Variants (including SNPs and indels) imported from dbSNP
cardiovascular phenotype	DOID:1287	cardiovascular system disease	rs41261344	dbSNP	3	38575385	38575385	A map of human genome variation from population-scale sequencing.	1000 Genomes Project Consortium, Abecasis GR, Altshuler D, Auton A, Brooks LD, Durbin RM, Gibbs RA, Hurles ME, McVean GA.	2010	20981092	PMC3042601	uncertain significance,not provided,benign,pathogenic,risk factor	Variants (including SNPs and indels) imported from dbSNP
cardiovascular phenotype	DOID:1287	cardiovascular system disease	rs34516117	dbSNP	11	2847771	2847771	A map of human genome variation from population-scale sequencing.	1000 Genomes Project Consortium, Abecasis GR, Altshuler D, Auton A, Brooks LD, Durbin RM, Gibbs RA, Hurles ME, McVean GA.	2010	20981092	PMC3042601	uncertain significance,not provided,likely benign	Variants (including SNPs and indels) imported from dbSNP
cardiovascular phenotype	DOID:1287	cardiovascular system disease	rs34516117	dbSNP	CHR_HSCHR11_1_CTG7	2847749	2847749	A map of human genome variation from population-scale sequencing.	1000 Genomes Project Consortium, Abecasis GR, Altshuler D, Auton A, Brooks LD, Durbin RM, Gibbs RA, Hurles ME, McVean GA.	2010	20981092	PMC3042601	uncertain significance,not provided,likely benign	Variants (including SNPs and indels) imported from dbSNP
cardiovascular phenotype	DOID:1287	cardiovascular system disease	rs16991652	dbSNP	21	34370503	34370503	A map of human genome variation from population-scale sequencing.	1000 Genomes Project Consortium, Abecasis GR, Altshuler D, Auton A, Brooks LD, Durbin RM, Gibbs RA, Hurles ME, McVean GA.	2010	20981092	PMC3042601	uncertain significance,not provided,benign,risk factor	Variants (including SNPs and indels) imported from dbSNP
cardiovascular phenotype	DOID:1287	cardiovascular system disease	rs72646967	dbSNP	22	19766568	19766568	A meta-analysis of 87,040 individuals identifies 23 new susceptibility loci for prostate cancer.	Al Olama AA, Kote-Jarai Z, Berndt SI, Conti DV, Schumacher F, Han Y, Benlloch S, Hazelett DJ, Wang Z, Saunders E, Leongamornlert D, Lindstrom S, Jugurnauth-Little S, Dadaev T, Tymrakiewicz M, Stram DO, Rand K, Wan P, Stram A, Sheng X, Pooler LC, Park K, X	2014	25217961	PMC4383163	benign	Variants (including SNPs and indels) imported from dbSNP
cardiovascular disease	DOID:1287	cardiovascular system disease	rs3918226	dbSNP	7	150993088	150993088	A meta-analysis of candidate gene polymorphisms and ischemic stroke in 6 study populations: association of lymphotoxin-alpha in nonhypertensive patients.	Wang X, Cheng S, Brophy VH, Erlich HA, Mannhalter C, Berger K, Lalouschek W, Browner WS, Shi Y, Ringelstein EB, Kessler C, Luedemann J, Lindpaintner K, Liu L, Ridker PM, Zee RY, Cook NR, RMS Stroke SNP Consortium.	2009	19131662	PMC2757095		Variants (including SNPs and indels) imported from dbSNP
cardiovascular disease	DOID:1287	cardiovascular system disease	rs7412	dbSNP	19	44908822	44908822	A meta-analysis of candidate gene polymorphisms and ischemic stroke in 6 study populations: association of lymphotoxin-alpha in nonhypertensive patients.	Wang X, Cheng S, Brophy VH, Erlich HA, Mannhalter C, Berger K, Lalouschek W, Browner WS, Shi Y, Ringelstein EB, Kessler C, Luedemann J, Lindpaintner K, Liu L, Ridker PM, Zee RY, Cook NR, RMS Stroke SNP Consortium.	2009	19131662	PMC2757095	pathogenic,drug response,other	Variants (including SNPs and indels) imported from dbSNP
cardiovascular disease	DOID:1287	cardiovascular system disease	rs1367117	dbSNP	2	21041028	21041028	A meta-analysis of candidate gene polymorphisms and ischemic stroke in 6 study populations: association of lymphotoxin-alpha in nonhypertensive patients.	Wang X, Cheng S, Brophy VH, Erlich HA, Mannhalter C, Berger K, Lalouschek W, Browner WS, Shi Y, Ringelstein EB, Kessler C, Luedemann J, Lindpaintner K, Liu L, Ridker PM, Zee RY, Cook NR, RMS Stroke SNP Consortium.	2009	19131662	PMC2757095	benign,likely benign	Variants (including SNPs and indels) imported from dbSNP
cardiovascular risk factors	DOID:1287	cardiovascular system disease	rs7412	dbSNP	19	44908822	44908822	A meta-analysis of candidate gene polymorphisms and ischemic stroke in 6 study populations: association of lymphotoxin-alpha in nonhypertensive patients.	Wang X, Cheng S, Brophy VH, Erlich HA, Mannhalter C, Berger K, Lalouschek W, Browner WS, Shi Y, Ringelstein EB, Kessler C, Luedemann J, Lindpaintner K, Liu L, Ridker PM, Zee RY, Cook NR, RMS Stroke SNP Consortium.	2009	19131662	PMC2757095	pathogenic,drug response,other	Variants (including SNPs and indels) imported from dbSNP
cardiovascular disease	DOID:1287	cardiovascular system disease	rs3184504	dbSNP	12	111446804	111446804	A meta-analysis of gene expression signatures of blood pressure and hypertension.	Huan T, Esko T, Peters MJ, Pilling LC, Schramm K, Schurmann C, Chen BH, Liu C, Joehanes R, Johnson AD, Yao C, Ying SX, Courchesne P, Milani L, Raghavachari N, Wang R, Liu P, Reinmaa E, Dehghan A, Hofman A, Uitterlinden AG, Hernandez DG, Bandinelli S, Sing	2015	25785607	PMC4365001		Variants (including SNPs and indels) imported from dbSNP
cardiac repolarization	DOID:10273	heart conduction disease	rs17029069	dbSNP	1	111921754	111921754	A meta-analysis of genome-wide association studies of the electrocardiographic early repolarization pattern.	Sinner MF, Porthan K, Noseworthy PA, Havulinna AS, Tikkanen JT, MГјller-Nurasyid M, Peloso G, Ulivi S, Beckmann BM, Brockhaus AC, Cooper RR, Gasparini P, Hengstenberg C, Hwang SJ, Iorio A, Junttila MJ, Klopp N, KГ¤hГ¶nen M, Laaksonen MA, LehtimГ¤ki T, Lichtne	2012	22683750	PMC3459269		Variants (including SNPs and indels) imported from dbSNP
cardiac repolarization	DOID:10273	heart conduction disease	rs11653989	dbSNP	17	77008131	77008131	A meta-analysis of genome-wide association studies of the electrocardiographic early repolarization pattern.	Sinner MF, Porthan K, Noseworthy PA, Havulinna AS, Tikkanen JT, MГјller-Nurasyid M, Peloso G, Ulivi S, Beckmann BM, Brockhaus AC, Cooper RR, Gasparini P, Hengstenberg C, Hwang SJ, Iorio A, Junttila MJ, Klopp N, KГ¤hГ¶nen M, Laaksonen MA, LehtimГ¤ki T, Lichtne	2012	22683750	PMC3459269		Variants (including SNPs and indels) imported from dbSNP
cardiovascular disease	DOID:1287	cardiovascular system disease	rs1229984	dbSNP	4	99318162	99318162	A meta-analysis of two genome-wide association studies to identify novel loci for maximum number of alcoholic drinks.	Kapoor M, Wang JC, Wetherill L, Le N, Bertelsen S, Hinrichs AL, Budde J, Agrawal A, Bucholz K, Dick D, Harari O, Hesselbrock V, Kramer J, Nurnberger JI, Rice J, Saccone N, Schuckit M, Tischfield J, Porjesz B, Edenberg HJ, Bierut L, Foroud T, Goate A.	2013	23743675	PMC3776011	protective	Variants (including SNPs and indels) imported from dbSNP
cardiovascular disease	DOID:1287	cardiovascular system disease	rs12740374	dbSNP	1	109274968	109274968	A method to predict the impact of regulatory variants from DNA sequence.	Lee D, Gorkin DU, Baker M, Strober BJ, Asoni AL, McCallion AS, Beer MA.	2015	26075791	PMC4520745	association	Variants (including SNPs and indels) imported from dbSNP
atrial fibrillation	DOID:0060224	atrial fibrillation	rs13385	dbSNP	5	140333293	140333293	A miR-1207-5p binding site polymorphism abolishes regulation of HBEGF and is associated with disease severity in CFHR5 nephropathy.	Papagregoriou G, Erguler K, Dweep H, Voskarides K, Koupepidou P, Athanasiou Y, Pierides A, Gretz N, Felekkis KN, Deltas C.	2012	22319602	PMC3271095		Variants (including SNPs and indels) imported from dbSNP
cardiovascular phenotype	DOID:1287	cardiovascular system disease	rs5742905	dbSNP	21	43063074	43063074	A missense mutation (I278T) in the cystathionine beta-synthase gene prevalent in pyridoxine-responsive homocystinuria and associated with mild clinical phenotype.	Shih VE, Fringer JM, Mandell R, Kraus JP, Berry GT, Heidenreich RA, Korson MS, Levy HL, Ramesh V.	1995	7611293	PMC1801250	pathogenic	Variants (including SNPs and indels) imported from dbSNP
cardiovascular phenotype	DOID:1287	cardiovascular system disease	rs71579353	dbSNP	10	74082499	74082499	A missense mutation in a ubiquitously expressed protein, vinculin, confers susceptibility to hypertrophic cardiomyopathy.	Vasile VC, Ommen SR, Edwards WD, Ackerman MJ.	2006	16712796		uncertain significance,pathogenic	Variants (including SNPs and indels) imported from dbSNP
familial hypertrophic cardiomyopathy 15	DOID:0080326	familial hypertrophic cardiomyopathy	rs71579353	dbSNP	10	74082499	74082499	A missense mutation in a ubiquitously expressed protein, vinculin, confers susceptibility to hypertrophic cardiomyopathy.	Vasile VC, Ommen SR, Edwards WD, Ackerman MJ.	2006	16712796		uncertain significance,pathogenic	Variants (including SNPs and indels) imported from dbSNP
cardiovascular phenotype	DOID:1287	cardiovascular system disease	rs121913002	dbSNP	2	219425727	219425727	A missense mutation in desmin tail domain linked to human dilated cardiomyopathy promotes cleavage of the head domain and abolishes its Z-disc localization.	Mavroidis M, Panagopoulou P, Kostavasili I, Weisleder N, Capetanaki Y.	2008	18539904	PMC2638966	uncertain significance,benign,likely benign,pathogenic	Variants (including SNPs and indels) imported from dbSNP
cardiovascular phenotype	DOID:1287	cardiovascular system disease	rs121913627	dbSNP	14	23427657	23427657	A missense mutation in the beta-myosin heavy chain gene in a Japanese patient with hypertrophic cardiomyopathy.	Nakajima-Taniguchi C, Azuma J, Nagata S, Kishimoto T, Yamauchi-Takihara K.	1995	8788376		uncertain significance,pathogenic	Variants (including SNPs and indels) imported from dbSNP
familial hypertrophic cardiomyopathy 1	DOID:0080326	familial hypertrophic cardiomyopathy	rs121913627	dbSNP	14	23427657	23427657	A missense mutation in the beta-myosin heavy chain gene in a Japanese patient with hypertrophic cardiomyopathy.	Nakajima-Taniguchi C, Azuma J, Nagata S, Kishimoto T, Yamauchi-Takihara K.	1995	8788376		uncertain significance,pathogenic	Variants (including SNPs and indels) imported from dbSNP
cardiomyopathy	DOID:0050700	cardiomyopathy	rs745902607	dbSNP	7	137016054	137016054	A missense mutation in the CHRM2 gene is associated with familial dilated cardiomyopathy.	Zhang L, Hu A, Yuan H, Cui L, Miao G, Yang X, Wang L, Liu J, Liu X, Wang S, Zhang Z, Liu L, Zhao R, Shen Y.	2008	18451336		uncertain significance	Variants (including SNPs and indels) imported from dbSNP
atrial fibrillation familial 14	DOID:0050650	familial atrial fibrillation	rs1085307094	dbSNP	11	118167088	118167088	A missense mutation in the sodium channel ?2 subunit reveals SCN2B as a new candidate gene for Brugada syndrome.	RiurГі H, Beltran-Alvarez P, Tarradas A, Selga E, Campuzano O, VergГ©s M, Pagans S, Iglesias A, Brugada J, Brugada P, VГЎzquez FM, PГ©rez GJ, Scornik FS, Brugada R.	2013	23559163		uncertain significance	Variants (including SNPs and indels) imported from dbSNP
familial hypertrophic cardiomyopathy 1	DOID:0080326	familial hypertrophic cardiomyopathy	rs121913634	dbSNP	14	23425372	23425372	A missense mutation of cardiac beta-myosin heavy chain gene linked to familial hypertrophic cardiomyopathy in affected Japanese families.	Harada H, Kimura A, Nishi H, Sasazuki T, Toshima H.	1993	8343162		pathogenic	Variants (including SNPs and indels) imported from dbSNP
cardiomyopathy	DOID:0050700	cardiomyopathy	rs2230233	dbSNP	18	31524735	31524735	A missense variant in desmoglein-2 predisposes to dilated cardiomyopathy.	Posch MG, Posch MJ, Geier C, Erdmann B, Mueller W, Richter A, Ruppert V, Pankuweit S, Maisch B, Perrot A, Buttgereit J, Dietz R, Haverkamp W, Ozcelik C.	2008	18678517		benign,likely benign	Variants (including SNPs and indels) imported from dbSNP
cardiomyopathy	DOID:0050700	cardiomyopathy	rs2230234	dbSNP	18	31524751	31524751	A missense variant in desmoglein-2 predisposes to dilated cardiomyopathy.	Posch MG, Posch MJ, Geier C, Erdmann B, Mueller W, Richter A, Ruppert V, Pankuweit S, Maisch B, Perrot A, Buttgereit J, Dietz R, Haverkamp W, Ozcelik C.	2008	18678517		uncertain significance,benign,likely benign	Variants (including SNPs and indels) imported from dbSNP
cardiomyopathy	DOID:0050700	cardiomyopathy	rs2278792	dbSNP	18	31542836	31542836	A missense variant in desmoglein-2 predisposes to dilated cardiomyopathy.	Posch MG, Posch MJ, Geier C, Erdmann B, Mueller W, Richter A, Ruppert V, Pankuweit S, Maisch B, Perrot A, Buttgereit J, Dietz R, Haverkamp W, Ozcelik C.	2008	18678517		benign,likely benign	Variants (including SNPs and indels) imported from dbSNP
cardiomyopathy	DOID:0050700	cardiomyopathy	rs1042769	dbSNP	18	31545891	31545891	A missense variant in desmoglein-2 predisposes to dilated cardiomyopathy.	Posch MG, Posch MJ, Geier C, Erdmann B, Mueller W, Richter A, Ruppert V, Pankuweit S, Maisch B, Perrot A, Buttgereit J, Dietz R, Haverkamp W, Ozcelik C.	2008	18678517		benign,likely benign	Variants (including SNPs and indels) imported from dbSNP
cardiomyopathy	DOID:0050700	cardiomyopathy	rs1791235	dbSNP	18	31546707	31546707	A missense variant in desmoglein-2 predisposes to dilated cardiomyopathy.	Posch MG, Posch MJ, Geier C, Erdmann B, Mueller W, Richter A, Ruppert V, Pankuweit S, Maisch B, Perrot A, Buttgereit J, Dietz R, Haverkamp W, Ozcelik C.	2008	18678517		benign,likely benign	Variants (including SNPs and indels) imported from dbSNP
cardiomyopathy	DOID:0050700	cardiomyopathy	rs1893963	dbSNP	18	31069076	31069076	A missense variant in desmoglein-2 predisposes to dilated cardiomyopathy.	Posch MG, Posch MJ, Geier C, Erdmann B, Mueller W, Richter A, Ruppert V, Pankuweit S, Maisch B, Perrot A, Buttgereit J, Dietz R, Haverkamp W, Ozcelik C.	2008	18678517		benign,likely benign	Variants (including SNPs and indels) imported from dbSNP
cardiomyopathy	DOID:0050700	cardiomyopathy	rs12954874	dbSNP	18	31093602	31093602	A missense variant in desmoglein-2 predisposes to dilated cardiomyopathy.	Posch MG, Posch MJ, Geier C, Erdmann B, Mueller W, Richter A, Ruppert V, Pankuweit S, Maisch B, Perrot A, Buttgereit J, Dietz R, Haverkamp W, Ozcelik C.	2008	18678517		benign,likely benign	Variants (including SNPs and indels) imported from dbSNP
cardiomyopathy	DOID:0050700	cardiomyopathy	rs61731921	dbSNP	18	31069009	31069009	A missense variant in desmoglein-2 predisposes to dilated cardiomyopathy.	Posch MG, Posch MJ, Geier C, Erdmann B, Mueller W, Richter A, Ruppert V, Pankuweit S, Maisch B, Perrot A, Buttgereit J, Dietz R, Haverkamp W, Ozcelik C.	2008	18678517		uncertain significance,benign,likely benign	Variants (including SNPs and indels) imported from dbSNP
cardiomyopathy	DOID:0050700	cardiomyopathy	rs79241126	dbSNP	18	31542655	31542655	A missense variant in desmoglein-2 predisposes to dilated cardiomyopathy.	Posch MG, Posch MJ, Geier C, Erdmann B, Mueller W, Richter A, Ruppert V, Pankuweit S, Maisch B, Perrot A, Buttgereit J, Dietz R, Haverkamp W, Ozcelik C.	2008	18678517		benign	Variants (including SNPs and indels) imported from dbSNP
cardiomyopathy	DOID:0050700	cardiomyopathy	rs117812913	dbSNP	18	31092104	31092104	A missense variant in desmoglein-2 predisposes to dilated cardiomyopathy.	Posch MG, Posch MJ, Geier C, Erdmann B, Mueller W, Richter A, Ruppert V, Pankuweit S, Maisch B, Perrot A, Buttgereit J, Dietz R, Haverkamp W, Ozcelik C.	2008	18678517		uncertain significance,benign	Variants (including SNPs and indels) imported from dbSNP
cardiomyopathy	DOID:0050700	cardiomyopathy	rs121913013	dbSNP	18	31519887	31519887	A missense variant in desmoglein-2 predisposes to dilated cardiomyopathy.	Posch MG, Posch MJ, Geier C, Erdmann B, Mueller W, Richter A, Ruppert V, Pankuweit S, Maisch B, Perrot A, Buttgereit J, Dietz R, Haverkamp W, Ozcelik C.	2008	18678517		uncertain significance,likely benign,risk factor	Variants (including SNPs and indels) imported from dbSNP
cardiomyopathy	DOID:0050700	cardiomyopathy	rs142841727	dbSNP	18	31546145	31546145	A missense variant in desmoglein-2 predisposes to dilated cardiomyopathy.	Posch MG, Posch MJ, Geier C, Erdmann B, Mueller W, Richter A, Ruppert V, Pankuweit S, Maisch B, Perrot A, Buttgereit J, Dietz R, Haverkamp W, Ozcelik C.	2008	18678517		benign	Variants (including SNPs and indels) imported from dbSNP
cardiovascular phenotype	DOID:1287	cardiovascular system disease	rs2230233	dbSNP	18	31524735	31524735	A missense variant in desmoglein-2 predisposes to dilated cardiomyopathy.	Posch MG, Posch MJ, Geier C, Erdmann B, Mueller W, Richter A, Ruppert V, Pankuweit S, Maisch B, Perrot A, Buttgereit J, Dietz R, Haverkamp W, Ozcelik C.	2008	18678517		benign,likely benign	Variants (including SNPs and indels) imported from dbSNP
cardiovascular phenotype	DOID:1287	cardiovascular system disease	rs2230234	dbSNP	18	31524751	31524751	A missense variant in desmoglein-2 predisposes to dilated cardiomyopathy.	Posch MG, Posch MJ, Geier C, Erdmann B, Mueller W, Richter A, Ruppert V, Pankuweit S, Maisch B, Perrot A, Buttgereit J, Dietz R, Haverkamp W, Ozcelik C.	2008	18678517		uncertain significance,benign,likely benign	Variants (including SNPs and indels) imported from dbSNP
cardiovascular phenotype	DOID:1287	cardiovascular system disease	rs2278792	dbSNP	18	31542836	31542836	A missense variant in desmoglein-2 predisposes to dilated cardiomyopathy.	Posch MG, Posch MJ, Geier C, Erdmann B, Mueller W, Richter A, Ruppert V, Pankuweit S, Maisch B, Perrot A, Buttgereit J, Dietz R, Haverkamp W, Ozcelik C.	2008	18678517		benign,likely benign	Variants (including SNPs and indels) imported from dbSNP
cardiovascular phenotype	DOID:1287	cardiovascular system disease	rs1042769	dbSNP	18	31545891	31545891	A missense variant in desmoglein-2 predisposes to dilated cardiomyopathy.	Posch MG, Posch MJ, Geier C, Erdmann B, Mueller W, Richter A, Ruppert V, Pankuweit S, Maisch B, Perrot A, Buttgereit J, Dietz R, Haverkamp W, Ozcelik C.	2008	18678517		benign,likely benign	Variants (including SNPs and indels) imported from dbSNP
cardiovascular phenotype	DOID:1287	cardiovascular system disease	rs1791235	dbSNP	18	31546707	31546707	A missense variant in desmoglein-2 predisposes to dilated cardiomyopathy.	Posch MG, Posch MJ, Geier C, Erdmann B, Mueller W, Richter A, Ruppert V, Pankuweit S, Maisch B, Perrot A, Buttgereit J, Dietz R, Haverkamp W, Ozcelik C.	2008	18678517		benign,likely benign	Variants (including SNPs and indels) imported from dbSNP
cardiovascular phenotype	DOID:1287	cardiovascular system disease	rs1893963	dbSNP	18	31069076	31069076	A missense variant in desmoglein-2 predisposes to dilated cardiomyopathy.	Posch MG, Posch MJ, Geier C, Erdmann B, Mueller W, Richter A, Ruppert V, Pankuweit S, Maisch B, Perrot A, Buttgereit J, Dietz R, Haverkamp W, Ozcelik C.	2008	18678517		benign,likely benign	Variants (including SNPs and indels) imported from dbSNP
cardiovascular phenotype	DOID:1287	cardiovascular system disease	rs12954874	dbSNP	18	31093602	31093602	A missense variant in desmoglein-2 predisposes to dilated cardiomyopathy.	Posch MG, Posch MJ, Geier C, Erdmann B, Mueller W, Richter A, Ruppert V, Pankuweit S, Maisch B, Perrot A, Buttgereit J, Dietz R, Haverkamp W, Ozcelik C.	2008	18678517		benign,likely benign	Variants (including SNPs and indels) imported from dbSNP
cardiovascular phenotype	DOID:1287	cardiovascular system disease	rs61731921	dbSNP	18	31069009	31069009	A missense variant in desmoglein-2 predisposes to dilated cardiomyopathy.	Posch MG, Posch MJ, Geier C, Erdmann B, Mueller W, Richter A, Ruppert V, Pankuweit S, Maisch B, Perrot A, Buttgereit J, Dietz R, Haverkamp W, Ozcelik C.	2008	18678517		uncertain significance,benign,likely benign	Variants (including SNPs and indels) imported from dbSNP
cardiovascular phenotype	DOID:1287	cardiovascular system disease	rs79241126	dbSNP	18	31542655	31542655	A missense variant in desmoglein-2 predisposes to dilated cardiomyopathy.	Posch MG, Posch MJ, Geier C, Erdmann B, Mueller W, Richter A, Ruppert V, Pankuweit S, Maisch B, Perrot A, Buttgereit J, Dietz R, Haverkamp W, Ozcelik C.	2008	18678517		benign	Variants (including SNPs and indels) imported from dbSNP
cardiovascular phenotype	DOID:1287	cardiovascular system disease	rs117812913	dbSNP	18	31092104	31092104	A missense variant in desmoglein-2 predisposes to dilated cardiomyopathy.	Posch MG, Posch MJ, Geier C, Erdmann B, Mueller W, Richter A, Ruppert V, Pankuweit S, Maisch B, Perrot A, Buttgereit J, Dietz R, Haverkamp W, Ozcelik C.	2008	18678517		uncertain significance,benign	Variants (including SNPs and indels) imported from dbSNP
cardiovascular phenotype	DOID:1287	cardiovascular system disease	rs121913013	dbSNP	18	31519887	31519887	A missense variant in desmoglein-2 predisposes to dilated cardiomyopathy.	Posch MG, Posch MJ, Geier C, Erdmann B, Mueller W, Richter A, Ruppert V, Pankuweit S, Maisch B, Perrot A, Buttgereit J, Dietz R, Haverkamp W, Ozcelik C.	2008	18678517		uncertain significance,likely benign,risk factor	Variants (including SNPs and indels) imported from dbSNP
cardiovascular phenotype	DOID:1287	cardiovascular system disease	rs142841727	dbSNP	18	31546145	31546145	A missense variant in desmoglein-2 predisposes to dilated cardiomyopathy.	Posch MG, Posch MJ, Geier C, Erdmann B, Mueller W, Richter A, Ruppert V, Pankuweit S, Maisch B, Perrot A, Buttgereit J, Dietz R, Haverkamp W, Ozcelik C.	2008	18678517		benign	Variants (including SNPs and indels) imported from dbSNP
atrial fibrillation	DOID:0060224	atrial fibrillation	rs72700114	dbSNP	1	170224684	170224684	A Missense Variant in PLEC Increases RiskВ of Atrial Fibrillation.	Thorolfsdottir RB, Sveinbjornsson G, Sulem P, Helgadottir A, Gretarsdottir S, Benonisdottir S, Magnusdottir A, Davidsson OB, Rajamani S, Roden DM, Darbar D, Pedersen TR, Sabatine MS, Jonsdottir I, Arnar DO, Thorsteinsdottir U, Gudbjartsson DF, Holm H, Ste	2017	29050564	PMC5704994		Variants (including SNPs and indels) imported from dbSNP
atrial fibrillation	DOID:0060224	atrial fibrillation	rs651386	dbSNP	1	170622169	170622169	A Missense Variant in PLEC Increases RiskВ of Atrial Fibrillation.	Thorolfsdottir RB, Sveinbjornsson G, Sulem P, Helgadottir A, Gretarsdottir S, Benonisdottir S, Magnusdottir A, Davidsson OB, Rajamani S, Roden DM, Darbar D, Pedersen TR, Sabatine MS, Jonsdottir I, Arnar DO, Thorsteinsdottir U, Gudbjartsson DF, Holm H, Ste	2017	29050564	PMC5704994		Variants (including SNPs and indels) imported from dbSNP
atrial fibrillation	DOID:0060224	atrial fibrillation	rs12044963	dbSNP	1	111849738	111849738	A Missense Variant in PLEC Increases RiskВ of Atrial Fibrillation.	Thorolfsdottir RB, Sveinbjornsson G, Sulem P, Helgadottir A, Gretarsdottir S, Benonisdottir S, Magnusdottir A, Davidsson OB, Rajamani S, Roden DM, Darbar D, Pedersen TR, Sabatine MS, Jonsdottir I, Arnar DO, Thorsteinsdottir U, Gudbjartsson DF, Holm H, Ste	2017	29050564	PMC5704994		Variants (including SNPs and indels) imported from dbSNP
atrial fibrillation	DOID:0060224	atrial fibrillation	rs2047036	dbSNP	10	103717405	103717405	A Missense Variant in PLEC Increases RiskВ of Atrial Fibrillation.	Thorolfsdottir RB, Sveinbjornsson G, Sulem P, Helgadottir A, Gretarsdottir S, Benonisdottir S, Magnusdottir A, Davidsson OB, Rajamani S, Roden DM, Darbar D, Pedersen TR, Sabatine MS, Jonsdottir I, Arnar DO, Thorsteinsdottir U, Gudbjartsson DF, Holm H, Ste	2017	29050564	PMC5704994		Variants (including SNPs and indels) imported from dbSNP
cardiovascular disease risk factors	DOID:1287	cardiovascular system disease	rs1260326	dbSNP	2	27508073	27508073	A modified response of NAFLD patients with non-significant fibrosis in nutritional counseling according to GCKR rs1260326.	Kaliora AC, Kalafati IP, Gioxari A, Diolintzi A, Kokkinos A, Dedoussis GV.	2018	28695325		association	Variants (including SNPs and indels) imported from dbSNP
cardiovascular phenotype	DOID:1287	cardiovascular system disease	rs121912504	dbSNP	7	150951711	150951711	A molecular basis for cardiac arrhythmia: HERG mutations cause long QT syndrome.	Curran ME, Splawski I, Timothy KW, Vincent GM, Green ED, Keating MT.	1995	7889573		not provided,likely pathogenic,pathogenic	Variants (including SNPs and indels) imported from dbSNP
familial hypertrophic cardiomyopathy 1	DOID:0080326	familial hypertrophic cardiomyopathy	rs121913624	dbSNP	14	23429278	23429278	A molecular basis for familial hypertrophic cardiomyopathy: a beta cardiac myosin heavy chain gene missense mutation.	Geisterfer-Lowrance AA, Kass S, Tanigawa G, Vosberg HP, McKenna W, Seidman CE, Seidman JG.	1990	1975517		pathogenic	Variants (including SNPs and indels) imported from dbSNP
cardiomyopathy restrictive	DOID:0050700	cardiomyopathy	rs267606617	dbSNP	MT	1555	1555	A molecular basis for human hypersensitivity to aminoglycoside antibiotics.	Hutchin T, Haworth I, Higashi K, Fischel-Ghodsian N, Stoneking M, Saha N, Arnos C, Cortopassi G.	1993	8414970	PMC310046	pathogenic,drug response	Variants (including SNPs and indels) imported from dbSNP
cardiomyopathy	DOID:0050700	cardiomyopathy	rs200625851	dbSNP	11	47342734	47342734	A molecular screening strategy based on beta-myosin heavy chain, cardiac myosin binding protein C and troponin T genes in Italian patients with hypertrophic cardiomyopathy.	Girolami F, Olivotto I, Passerini I, Zachara E, Nistri S, Re F, Fantini S, Baldini K, Torricelli F, Cecchi F.	2006	16858239		uncertain significance,pathogenic	Variants (including SNPs and indels) imported from dbSNP
cardiovascular phenotype	DOID:1287	cardiovascular system disease	rs121909374	dbSNP	11	47342578	47342578	A molecular screening strategy based on beta-myosin heavy chain, cardiac myosin binding protein C and troponin T genes in Italian patients with hypertrophic cardiomyopathy.	Girolami F, Olivotto I, Passerini I, Zachara E, Nistri S, Re F, Fantini S, Baldini K, Torricelli F, Cecchi F.	2006	16858239		pathogenic	Variants (including SNPs and indels) imported from dbSNP
cardiovascular phenotype	DOID:1287	cardiovascular system disease	rs200625851	dbSNP	11	47342734	47342734	A molecular screening strategy based on beta-myosin heavy chain, cardiac myosin binding protein C and troponin T genes in Italian patients with hypertrophic cardiomyopathy.	Girolami F, Olivotto I, Passerini I, Zachara E, Nistri S, Re F, Fantini S, Baldini K, Torricelli F, Cecchi F.	2006	16858239		uncertain significance,pathogenic	Variants (including SNPs and indels) imported from dbSNP
cardiovascular phenotype	DOID:1287	cardiovascular system disease	rs371513491	dbSNP	11	47343126	47343126	A molecular screening strategy based on beta-myosin heavy chain, cardiac myosin binding protein C and troponin T genes in Italian patients with hypertrophic cardiomyopathy.	Girolami F, Olivotto I, Passerini I, Zachara E, Nistri S, Re F, Fantini S, Baldini K, Torricelli F, Cecchi F.	2006	16858239		uncertain significance	Variants (including SNPs and indels) imported from dbSNP
cardiovascular phenotype	DOID:1287	cardiovascular system disease	rs397515912	dbSNP	11	47342611	47342611	A molecular screening strategy based on beta-myosin heavy chain, cardiac myosin binding protein C and troponin T genes in Italian patients with hypertrophic cardiomyopathy.	Girolami F, Olivotto I, Passerini I, Zachara E, Nistri S, Re F, Fantini S, Baldini K, Torricelli F, Cecchi F.	2006	16858239		uncertain significance,likely pathogenic	Variants (including SNPs and indels) imported from dbSNP
cardiovascular phenotype	DOID:1287	cardiovascular system disease	rs397516007	dbSNP	11	47333332	47333332	A molecular screening strategy based on beta-myosin heavy chain, cardiac myosin binding protein C and troponin T genes in Italian patients with hypertrophic cardiomyopathy.	Girolami F, Olivotto I, Passerini I, Zachara E, Nistri S, Re F, Fantini S, Baldini K, Torricelli F, Cecchi F.	2006	16858239		pathogenic	Variants (including SNPs and indels) imported from dbSNP
cardiovascular phenotype	DOID:1287	cardiovascular system disease	rs397516074	dbSNP	11	47348424	47348424	A molecular screening strategy based on beta-myosin heavy chain, cardiac myosin binding protein C and troponin T genes in Italian patients with hypertrophic cardiomyopathy.	Girolami F, Olivotto I, Passerini I, Zachara E, Nistri S, Re F, Fantini S, Baldini K, Torricelli F, Cecchi F.	2006	16858239		pathogenic	Variants (including SNPs and indels) imported from dbSNP
cardiovascular phenotype	DOID:1287	cardiovascular system disease	rs36211723	dbSNP	11	47338520	47338520	A molecular screening strategy based on beta-myosin heavy chain, cardiac myosin binding protein C and troponin T genes in Italian patients with hypertrophic cardiomyopathy.	Girolami F, Olivotto I, Passerini I, Zachara E, Nistri S, Re F, Fantini S, Baldini K, Torricelli F, Cecchi F.	2006	16858239		uncertain significance,pathogenic	Variants (including SNPs and indels) imported from dbSNP
cardiovascular phenotype	DOID:1287	cardiovascular system disease	rs397516171	dbSNP	14	23424041	23424041	A molecular screening strategy based on beta-myosin heavy chain, cardiac myosin binding protein C and troponin T genes in Italian patients with hypertrophic cardiomyopathy.	Girolami F, Olivotto I, Passerini I, Zachara E, Nistri S, Re F, Fantini S, Baldini K, Torricelli F, Cecchi F.	2006	16858239		likely pathogenic,pathogenic	Variants (including SNPs and indels) imported from dbSNP
cardiovascular phenotype	DOID:1287	cardiovascular system disease	rs397516201	dbSNP	14	23418249	23418249	A molecular screening strategy based on beta-myosin heavy chain, cardiac myosin binding protein C and troponin T genes in Italian patients with hypertrophic cardiomyopathy.	Girolami F, Olivotto I, Passerini I, Zachara E, Nistri S, Re F, Fantini S, Baldini K, Torricelli F, Cecchi F.	2006	16858239		uncertain significance,likely pathogenic	Variants (including SNPs and indels) imported from dbSNP
familial hypertrophic cardiomyopathy 1	DOID:0080326	familial hypertrophic cardiomyopathy	rs121909374	dbSNP	11	47342578	47342578	A molecular screening strategy based on beta-myosin heavy chain, cardiac myosin binding protein C and troponin T genes in Italian patients with hypertrophic cardiomyopathy.	Girolami F, Olivotto I, Passerini I, Zachara E, Nistri S, Re F, Fantini S, Baldini K, Torricelli F, Cecchi F.	2006	16858239		pathogenic	Variants (including SNPs and indels) imported from dbSNP
familial hypertrophic cardiomyopathy 1	DOID:0080326	familial hypertrophic cardiomyopathy	rs397516171	dbSNP	14	23424041	23424041	A molecular screening strategy based on beta-myosin heavy chain, cardiac myosin binding protein C and troponin T genes in Italian patients with hypertrophic cardiomyopathy.	Girolami F, Olivotto I, Passerini I, Zachara E, Nistri S, Re F, Fantini S, Baldini K, Torricelli F, Cecchi F.	2006	16858239		likely pathogenic,pathogenic	Variants (including SNPs and indels) imported from dbSNP
familial hypertrophic cardiomyopathy 1	DOID:0080326	familial hypertrophic cardiomyopathy	rs863225269	dbSNP	14	23392970	23392972	A molecular screening strategy based on beta-myosin heavy chain, cardiac myosin binding protein C and troponin T genes in Italian patients with hypertrophic cardiomyopathy.	Girolami F, Olivotto I, Passerini I, Zachara E, Nistri S, Re F, Fantini S, Baldini K, Torricelli F, Cecchi F.	2006	16858239		pathogenic	Variants (including SNPs and indels) imported from dbSNP
familial hypertrophic cardiomyopathy 4	DOID:0080326	familial hypertrophic cardiomyopathy	rs121909374	dbSNP	11	47342578	47342578	A molecular screening strategy based on beta-myosin heavy chain, cardiac myosin binding protein C and troponin T genes in Italian patients with hypertrophic cardiomyopathy.	Girolami F, Olivotto I, Passerini I, Zachara E, Nistri S, Re F, Fantini S, Baldini K, Torricelli F, Cecchi F.	2006	16858239		pathogenic	Variants (including SNPs and indels) imported from dbSNP
familial hypertrophic cardiomyopathy 4	DOID:0080326	familial hypertrophic cardiomyopathy	rs200625851	dbSNP	11	47342734	47342734	A molecular screening strategy based on beta-myosin heavy chain, cardiac myosin binding protein C and troponin T genes in Italian patients with hypertrophic cardiomyopathy.	Girolami F, Olivotto I, Passerini I, Zachara E, Nistri S, Re F, Fantini S, Baldini K, Torricelli F, Cecchi F.	2006	16858239		uncertain significance,pathogenic	Variants (including SNPs and indels) imported from dbSNP
familial hypertrophic cardiomyopathy 4	DOID:0080326	familial hypertrophic cardiomyopathy	rs371513491	dbSNP	11	47343126	47343126	A molecular screening strategy based on beta-myosin heavy chain, cardiac myosin binding protein C and troponin T genes in Italian patients with hypertrophic cardiomyopathy.	Girolami F, Olivotto I, Passerini I, Zachara E, Nistri S, Re F, Fantini S, Baldini K, Torricelli F, Cecchi F.	2006	16858239		uncertain significance	Variants (including SNPs and indels) imported from dbSNP
familial hypertrophic cardiomyopathy 4	DOID:0080326	familial hypertrophic cardiomyopathy	rs397516074	dbSNP	11	47348424	47348424	A molecular screening strategy based on beta-myosin heavy chain, cardiac myosin binding protein C and troponin T genes in Italian patients with hypertrophic cardiomyopathy.	Girolami F, Olivotto I, Passerini I, Zachara E, Nistri S, Re F, Fantini S, Baldini K, Torricelli F, Cecchi F.	2006	16858239		pathogenic	Variants (including SNPs and indels) imported from dbSNP
familial hypertrophic cardiomyopathy 4	DOID:0080326	familial hypertrophic cardiomyopathy	rs36211723	dbSNP	11	47338520	47338520	A molecular screening strategy based on beta-myosin heavy chain, cardiac myosin binding protein C and troponin T genes in Italian patients with hypertrophic cardiomyopathy.	Girolami F, Olivotto I, Passerini I, Zachara E, Nistri S, Re F, Fantini S, Baldini K, Torricelli F, Cecchi F.	2006	16858239		uncertain significance,pathogenic	Variants (including SNPs and indels) imported from dbSNP
familial hypertrophic cardiomyopathy 1	DOID:0080326	familial hypertrophic cardiomyopathy	rs121913624	dbSNP	14	23429278	23429278	A mouse model of familial hypertrophic cardiomyopathy.	Geisterfer-Lowrance AA, Christe M, Conner DA, Ingwall JS, Schoen FJ, Seidman CE, Seidman JG.	1996	8614836		pathogenic	Variants (including SNPs and indels) imported from dbSNP
cardiovascular disease	DOID:1287	cardiovascular system disease	rs7412	dbSNP	19	44908822	44908822	A multi-factorial analysis of response to warfarin in a UK prospective cohort.	Bourgeois S, Jorgensen A, Zhang EJ, Hanson A, Gillman MS, Bumpstead S, Toh CH, Williamson P, Daly AK, Kamali F, Deloukas P, Pirmohamed M.	2016	26739746	PMC4702374	pathogenic,drug response,other	Variants (including SNPs and indels) imported from dbSNP
cardiovascular risk factors	DOID:1287	cardiovascular system disease	rs7412	dbSNP	19	44908822	44908822	A multi-factorial analysis of response to warfarin in a UK prospective cohort.	Bourgeois S, Jorgensen A, Zhang EJ, Hanson A, Gillman MS, Bumpstead S, Toh CH, Williamson P, Daly AK, Kamali F, Deloukas P, Pirmohamed M.	2016	26739746	PMC4702374	pathogenic,drug response,other	Variants (including SNPs and indels) imported from dbSNP
cardiovascular disease risk factors	DOID:1287	cardiovascular system disease	rs6511720	dbSNP	19	11091630	11091630	A multi-locus genetic risk score for abdominal aortic aneurysm.	Ye Z, Austin E, Schaid DJ, Kullo IJ.	2016	26820802	PMC5507075	benign	Variants (including SNPs and indels) imported from dbSNP
cardiovascular disease	DOID:1287	cardiovascular system disease	rs9818870	dbSNP	3	138403280	138403280	A multilocus genetic risk score for coronary heart disease: case-control and prospective cohort analyses.	Ripatti S, Tikkanen E, Orho-Melander M, Havulinna AS, Silander K, Sharma A, Guiducci C, Perola M, Jula A, Sinisalo J, Lokki ML, Nieminen MS, Melander O, Salomaa V, Peltonen L, Kathiresan S.	2010	20971364	PMC2965351		Variants (including SNPs and indels) imported from dbSNP
cardiovascular disease	DOID:1287	cardiovascular system disease	rs3184504	dbSNP	12	111446804	111446804	A multilocus genetic risk score for coronary heart disease: case-control and prospective cohort analyses.	Ripatti S, Tikkanen E, Orho-Melander M, Havulinna AS, Silander K, Sharma A, Guiducci C, Perola M, Jula A, Sinisalo J, Lokki ML, Nieminen MS, Melander O, Salomaa V, Peltonen L, Kathiresan S.	2010	20971364	PMC2965351		Variants (including SNPs and indels) imported from dbSNP
cardiovascular disease	DOID:1287	cardiovascular system disease	rs6686889	dbSNP	1	24703979	24703979	A multimodal approach to cardiovascular risk stratification in patients with type 2 diabetes incorporating retinal, genomic and clinical features.	Fetit AE, Doney AS, Hogg S, Wang R, MacGillivray T, Wardlaw JM, Doubal FN, McKay GJ, McKenna S, Trucco E.	2019	30837638	PMC6401035		Variants (including SNPs and indels) imported from dbSNP
cardiovascular disease	DOID:1287	cardiovascular system disease	rs9549328	dbSNP	13	112981842	112981842	A multimodal approach to cardiovascular risk stratification in patients with type 2 diabetes incorporating retinal, genomic and clinical features.	Fetit AE, Doney AS, Hogg S, Wang R, MacGillivray T, Wardlaw JM, Doubal FN, McKay GJ, McKenna S, Trucco E.	2019	30837638	PMC6401035		Variants (including SNPs and indels) imported from dbSNP
heart rate increase in response to exercise	DOID:10273	heart conduction disease	rs12906962	dbSNP	15	94768842	94768842	A multimodal approach to cardiovascular risk stratification in patients with type 2 diabetes incorporating retinal, genomic and clinical features.	Fetit AE, Doney AS, Hogg S, Wang R, MacGillivray T, Wardlaw JM, Doubal FN, McKay GJ, McKenna S, Trucco E.	2019	30837638	PMC6401035		Variants (including SNPs and indels) imported from dbSNP
heart rate response to exercise	DOID:10273	heart conduction disease	rs12906962	dbSNP	15	94768842	94768842	A multimodal approach to cardiovascular risk stratification in patients with type 2 diabetes incorporating retinal, genomic and clinical features.	Fetit AE, Doney AS, Hogg S, Wang R, MacGillivray T, Wardlaw JM, Doubal FN, McKay GJ, McKenna S, Trucco E.	2019	30837638	PMC6401035		Variants (including SNPs and indels) imported from dbSNP
heart rate response to recovery post exercise	DOID:10273	heart conduction disease	rs12906962	dbSNP	15	94768842	94768842	A multimodal approach to cardiovascular risk stratification in patients with type 2 diabetes incorporating retinal, genomic and clinical features.	Fetit AE, Doney AS, Hogg S, Wang R, MacGillivray T, Wardlaw JM, Doubal FN, McKay GJ, McKenna S, Trucco E.	2019	30837638	PMC6401035		Variants (including SNPs and indels) imported from dbSNP
heart rate response to recovery post exercise (50 sec)	DOID:10273	heart conduction disease	rs12906962	dbSNP	15	94768842	94768842	A multimodal approach to cardiovascular risk stratification in patients with type 2 diabetes incorporating retinal, genomic and clinical features.	Fetit AE, Doney AS, Hogg S, Wang R, MacGillivray T, Wardlaw JM, Doubal FN, McKay GJ, McKenna S, Trucco E.	2019	30837638	PMC6401035		Variants (including SNPs and indels) imported from dbSNP
cardiovascular disease	DOID:1287	cardiovascular system disease	rs1801253	dbSNP	10	114045297	114045297	A Multiple Interaction Analysis Reveals ADRB3 as a Potential Candidate for Gallbladder Cancer Predisposition via a Complex Interaction with Other Candidate Gene Variations.	Rai R, Kim JJ, Misra S, Kumar A, Mittal B.	2015	26602921	PMC4691025	drug response	Variants (including SNPs and indels) imported from dbSNP
cardiovascular disease	DOID:1287	cardiovascular system disease	rs1229984	dbSNP	4	99318162	99318162	A multiple mediator analysis approach to quantify the effects of the ADH1B and ALDH2 genes on hepatocellular carcinoma risk.	Shih S, Huang YT, Yang HI.	2018	29600553	PMC5980724	protective	Variants (including SNPs and indels) imported from dbSNP
heart diseases	DOID:114	heart disease	rs740363	dbSNP	10	116816095	116816095	A multistage genetic association study identifies breast cancer risk loci at 10q25 and 16q24.	Higginbotham KS, Breyer JP, McReynolds KM, Bradley KM, Schuyler PA, Plummer WD, Freudenthal ME, Trentham-Dietz A, Newcomb PA, Parl FF, Sanders ME, Page DL, Egan KM, Dupont WD, Smith JR.	2012	22806168	PMC3707501		Variants (including SNPs and indels) imported from dbSNP
heart failure	DOID:114	heart disease	rs740363	dbSNP	10	116816095	116816095	A multistage genetic association study identifies breast cancer risk loci at 10q25 and 16q24.	Higginbotham KS, Breyer JP, McReynolds KM, Bradley KM, Schuyler PA, Plummer WD, Freudenthal ME, Trentham-Dietz A, Newcomb PA, Parl FF, Sanders ME, Page DL, Egan KM, Dupont WD, Smith JR.	2012	22806168	PMC3707501		Variants (including SNPs and indels) imported from dbSNP
cardiovascular disease	DOID:1287	cardiovascular system disease	rs12740374	dbSNP	1	109274968	109274968	A multivariate genome-wide association analysis of 10 LDL subfractions, and their response to statin treatment, in 1868 Caucasians.	Shim H, Chasman DI, Smith JD, Mora S, Ridker PM, Nickerson DA, Krauss RM, Stephens M.	2015	25898129	PMC4405269	association	Variants (including SNPs and indels) imported from dbSNP
cardiovascular disease	DOID:1287	cardiovascular system disease	rs7412	dbSNP	19	44908822	44908822	A multivariate genome-wide association analysis of 10 LDL subfractions, and their response to statin treatment, in 1868 Caucasians.	Shim H, Chasman DI, Smith JD, Mora S, Ridker PM, Nickerson DA, Krauss RM, Stephens M.	2015	25898129	PMC4405269	pathogenic,drug response,other	Variants (including SNPs and indels) imported from dbSNP
cardiovascular risk factors	DOID:1287	cardiovascular system disease	rs247616	dbSNP	16	56955678	56955678	A multivariate genome-wide association analysis of 10 LDL subfractions, and their response to statin treatment, in 1868 Caucasians.	Shim H, Chasman DI, Smith JD, Mora S, Ridker PM, Nickerson DA, Krauss RM, Stephens M.	2015	25898129	PMC4405269		Variants (including SNPs and indels) imported from dbSNP
cardiovascular risk factors	DOID:1287	cardiovascular system disease	rs7412	dbSNP	19	44908822	44908822	A multivariate genome-wide association analysis of 10 LDL subfractions, and their response to statin treatment, in 1868 Caucasians.	Shim H, Chasman DI, Smith JD, Mora S, Ridker PM, Nickerson DA, Krauss RM, Stephens M.	2015	25898129	PMC4405269	pathogenic,drug response,other	Variants (including SNPs and indels) imported from dbSNP
cardiovascular phenotype	DOID:1287	cardiovascular system disease	rs137854604	dbSNP	3	38551243	38551243	A mutant cardiac sodium channel with multiple biophysical defects associated with overlapping clinical features of Brugada syndrome and cardiac conduction disease.	Shirai N, Makita N, Sasaki K, Yokoi H, Sakuma I, Sakurada H, Akai J, Kimura A, Hiraoka M, Kitabatake A.	2002	11827685		not provided,likely pathogenic,pathogenic	Variants (including SNPs and indels) imported from dbSNP
cardiovascular phenotype	DOID:1287	cardiovascular system disease	rs104894503	dbSNP	15	63060899	63060899	A mutant tropomyosin that causes hypertrophic cardiomyopathy is expressed in vivo and associated with an increased calcium sensitivity.	Bottinelli R, Coviello DA, Redwood CS, Pellegrino MA, Maron BJ, Spirito P, Watkins H, Reggiani C.	1998	9440709		pathogenic	Variants (including SNPs and indels) imported from dbSNP
familial hypertrophic cardiomyopathy 3	DOID:0080326	familial hypertrophic cardiomyopathy	rs104894503	dbSNP	15	63060899	63060899	A mutant tropomyosin that causes hypertrophic cardiomyopathy is expressed in vivo and associated with an increased calcium sensitivity.	Bottinelli R, Coviello DA, Redwood CS, Pellegrino MA, Maron BJ, Spirito P, Watkins H, Reggiani C.	1998	9440709		pathogenic	Variants (including SNPs and indels) imported from dbSNP
cardioencephalomyopathy fatal infantile due to cytochrome c oxidase deficiency 3	DOID:0050713	fatal infantile cardioencephalomyopathy due to cytochrome c oxidase deficiency	rs387907099	dbSNP	2	98604134	98604134	A mutation in C2orf64 causes impaired cytochrome c oxidase assembly and mitochondrial cardiomyopathy.	Huigsloot M, Nijtmans LG, Szklarczyk R, Baars MJ, van den Brand MA, Hendriksfranssen MG, van den Heuvel LP, Smeitink JA, Huynen MA, Rodenburg RJ.	2011	21457908	PMC3071910	pathogenic	Variants (including SNPs and indels) imported from dbSNP
cardiovascular phenotype	DOID:1287	cardiovascular system disease	rs199472921	dbSNP	7	150951712	150951712	A mutation in HERG associated with notched T waves in long QT syndrome.	Dausse E, Berthet M, Denjoy I, AndrГ©-Fouet X, Cruaud C, Bennaceur M, FaurГ© S, Coumel P, Schwartz K, Guicheney P.	1996	8877771		not provided,pathogenic	Variants (including SNPs and indels) imported from dbSNP
heart failure	DOID:114	heart disease	rs1051219	dbSNP	12	131753205	131753205	A mutation in POLE predisposing to a multi-tumour phenotype.	Rohlin A, Zagoras T, Nilsson S, Lundstam U, WahlstrГ¶m J, HultГ©n L, Martinsson T, Karlsson GB, Nordling M.	2014	24788313	PMC4079162		Variants (including SNPs and indels) imported from dbSNP
atrial fibrillation familial 18	DOID:0050650	familial atrial fibrillation	rs886037778	dbSNP	17	47209453	47209453	A mutation in the atrial-specific myosin light chain gene (MYL4) causes familial atrial fibrillation.	Orr N, Arnaout R, Gula LJ, Spears DA, Leong-Sit P, Li Q, Tarhuni W, Reischauer S, Chauhan VS, Borkovich M, Uppal S, Adler A, Coughlin SR, Stainier DYR, Gollob MH.	2016	27066836	PMC4832069	pathogenic	Variants (including SNPs and indels) imported from dbSNP
atrial fibrillation familial 16	DOID:0050650	familial atrial fibrillation	rs121918282	dbSNP	11	123653773	123653773	A mutation in the beta 3 subunit of the cardiac sodium channel associated with Brugada ECG phenotype.	Hu D, Barajas-Martinez H, Burashnikov E, Springer M, Wu Y, Varro A, Pfeiffer R, Koopmann TT, Cordeiro JM, Guerchicoff A, Pollevick GD, Antzelevitch C, Antzelevitch C.	2009	20031595	PMC2801870	uncertain significance,likely pathogenic,pathogenic	Variants (including SNPs and indels) imported from dbSNP
cardiovascular phenotype	DOID:1287	cardiovascular system disease	rs121918282	dbSNP	11	123653773	123653773	A mutation in the beta 3 subunit of the cardiac sodium channel associated with Brugada ECG phenotype.	Hu D, Barajas-Martinez H, Burashnikov E, Springer M, Wu Y, Varro A, Pfeiffer R, Koopmann TT, Cordeiro JM, Guerchicoff A, Pollevick GD, Antzelevitch C, Antzelevitch C.	2009	20031595	PMC2801870	uncertain significance,likely pathogenic,pathogenic	Variants (including SNPs and indels) imported from dbSNP
cardiomyopathy	DOID:0050700	cardiomyopathy	rs727503246	dbSNP	14	23418313	23418313	A mutation in the beta-myosin rod associated with hypertrophic cardiomyopathy has an unexpected molecular phenotype.	Armel TZ, Leinwand LA.	2010	19913502	PMC2821741	uncertain significance,likely pathogenic,pathogenic	Variants (including SNPs and indels) imported from dbSNP
cardiovascular phenotype	DOID:1287	cardiovascular system disease	rs727503246	dbSNP	14	23418313	23418313	A mutation in the beta-myosin rod associated with hypertrophic cardiomyopathy has an unexpected molecular phenotype.	Armel TZ, Leinwand LA.	2010	19913502	PMC2821741	uncertain significance,likely pathogenic,pathogenic	Variants (including SNPs and indels) imported from dbSNP
familial hypertrophic cardiomyopathy 1	DOID:0080326	familial hypertrophic cardiomyopathy	rs727503246	dbSNP	14	23418313	23418313	A mutation in the beta-myosin rod associated with hypertrophic cardiomyopathy has an unexpected molecular phenotype.	Armel TZ, Leinwand LA.	2010	19913502	PMC2821741	uncertain significance,likely pathogenic,pathogenic	Variants (including SNPs and indels) imported from dbSNP
cardiovascular phenotype	DOID:1287	cardiovascular system disease	rs41261344	dbSNP	3	38575385	38575385	A mutation in the CACNA1C gene leads to early repolarization syndrome with incomplete penetrance: A Chinese family study.	Liu X, Shen Y, Xie J, Bao H, Cao Q, Wan R, Xu X, Zhou H, Huang L, Xu Z, Zhu W, Hu J, Cheng X, Hong K.	2017	28493952	PMC5426766	uncertain significance,not provided,benign,pathogenic,risk factor	Variants (including SNPs and indels) imported from dbSNP
cardiomyopathy	DOID:0050700	cardiomyopathy	rs397516784	dbSNP	6	118558957	118558963	A mutation in the human phospholamban gene, deleting arginine 14, results in lethal, hereditary cardiomyopathy.	Haghighi K, Kolokathis F, Gramolini AO, Waggoner JR, Pater L, Lynch RA, Fan GC, Tsiapras D, Parekh RR, Dorn GW, MacLennan DH, Kremastinos DT, Kranias EG.	2006	16432188	PMC1360586	pathogenic	Variants (including SNPs and indels) imported from dbSNP
cardiovascular phenotype	DOID:1287	cardiovascular system disease	rs397516784	dbSNP	6	118558957	118558963	A mutation in the human phospholamban gene, deleting arginine 14, results in lethal, hereditary cardiomyopathy.	Haghighi K, Kolokathis F, Gramolini AO, Waggoner JR, Pater L, Lynch RA, Fan GC, Tsiapras D, Parekh RR, Dorn GW, MacLennan DH, Kremastinos DT, Kranias EG.	2006	16432188	PMC1360586	pathogenic	Variants (including SNPs and indels) imported from dbSNP
cardiovascular phenotype	DOID:1287	cardiovascular system disease	rs17215437	dbSNP	11	74457316	74457316	A mutation in the KCNE3 potassium channel gene is associated with susceptibility to thyrotoxic hypokalemic periodic paralysis.	Dias Da Silva MR, Cerutti JM, Arnaldi LA, Maciel RM.	2002	12414843		uncertain significance,benign,likely benign	Variants (including SNPs and indels) imported from dbSNP
cardiomyopathy	DOID:0050700	cardiomyopathy	rs138251566	dbSNP	10	86706685	86706685	A mutation in the Z-line Cypher/ZASP protein is associated with arrhythmogenic right ventricular cardiomyopathy.	Lopez-Ayala JM, Ortiz-Genga M, Gomez-Milanes I, Lopez-Cuenca D, Ruiz-Espejo F, Sanchez-Munoz JJ, Oliva-Sandoval MJ, Monserrat L, Gimeno JR.	2015	25041374		uncertain significance,likely benign	Variants (including SNPs and indels) imported from dbSNP
cardiovascular phenotype	DOID:1287	cardiovascular system disease	rs138251566	dbSNP	10	86706685	86706685	A mutation in the Z-line Cypher/ZASP protein is associated with arrhythmogenic right ventricular cardiomyopathy.	Lopez-Ayala JM, Ortiz-Genga M, Gomez-Milanes I, Lopez-Cuenca D, Ruiz-Espejo F, Sanchez-Munoz JJ, Oliva-Sandoval MJ, Monserrat L, Gimeno JR.	2015	25041374		uncertain significance,likely benign	Variants (including SNPs and indels) imported from dbSNP
familial hypertrophic cardiomyopathy 13	DOID:0080326	familial hypertrophic cardiomyopathy	rs267607123	dbSNP	3	52452222	52452222	A mutation in TNNC1-encoded cardiac troponin C, TNNC1-A31S, predisposes to hypertrophic cardiomyopathy and ventricular fibrillation.	Parvatiyar MS, Landstrom AP, Figueiredo-Freitas C, Potter JD, Ackerman MJ, Pinto JR.	2012	22815480	PMC3442518	uncertain significance,pathogenic	Variants (including SNPs and indels) imported from dbSNP
familial hypertrophic cardiomyopathy 13	DOID:0080326	familial hypertrophic cardiomyopathy	rs397514616	dbSNP	3	52452217	52452217	A mutation in TNNC1-encoded cardiac troponin C, TNNC1-A31S, predisposes to hypertrophic cardiomyopathy and ventricular fibrillation.	Parvatiyar MS, Landstrom AP, Figueiredo-Freitas C, Potter JD, Ackerman MJ, Pinto JR.	2012	22815480	PMC3442518	pathogenic	Variants (including SNPs and indels) imported from dbSNP
cardiovascular disease	DOID:1287	cardiovascular system disease	rs1801253	dbSNP	10	114045297	114045297	A mutation-centric approach to identifying pharmacogenomic relations in text.	Rance B, Doughty E, Demner-Fushman D, Kann MG, Bodenreider O.	2012	22683993	PMC3438287	drug response	Variants (including SNPs and indels) imported from dbSNP
cardiovascular disease	DOID:1287	cardiovascular system disease	rs1229984	dbSNP	4	99318162	99318162	A mutational signature associated with alcohol consumption and prognostically significantly mutated driver genes in esophageal squamous cell carcinoma.	Li XC, Wang MY, Yang M, Dai HJ, Zhang BF, Wang W, Chu XL, Wang X, Zheng H, Niu RF, Zhang W, Chen KX.	2018	29351612	PMC5913594	protective	Variants (including SNPs and indels) imported from dbSNP
cardiovascular phenotype	DOID:1287	cardiovascular system disease	rs9840993	dbSNP	3	123739046	123739046	A MYLK variant regulates asthmatic inflammation via alterations in mRNA secondary structure.	Wang T, Zhou T, Saadat L, Garcia JG.	2015	25271083	PMC4795064	benign,likely benign	Variants (including SNPs and indels) imported from dbSNP
familial hypertrophic cardiomyopathy 1	DOID:0080326	familial hypertrophic cardiomyopathy	rs36211715	dbSNP	14	23424839	23424839	A myosin missense mutation, not a null allele, causes familial hypertrophic cardiomyopathy.	Nishi H, Kimura A, Harada H, Koga Y, Adachi K, Matsuyama K, Koyanagi T, Yasunaga S, Imaizumi T, Toshima H.	1995	7796500		uncertain significance,pathogenic	Variants (including SNPs and indels) imported from dbSNP
cardiomyopathy	DOID:0050700	cardiomyopathy	rs104894845	dbSNP	X	101401752	101401752	A nationwide blood spot screening study for Fabry disease in the Czech Republic haemodialysis patient population.	Merta M, Reiterova J, Ledvinova J, PoupetovГЎ H, Dobrovolny R, RysavГЎ R, MaixnerovГЎ D, Bultas J, MotГЎn J, Slivkova J, Sobotova D, Smrzova J, Tesar V.	2007	17040996		uncertain significance,likely pathogenic,pathogenic	Variants (including SNPs and indels) imported from dbSNP
cardiovascular phenotype	DOID:1287	cardiovascular system disease	rs104894845	dbSNP	X	101401752	101401752	A nationwide blood spot screening study for Fabry disease in the Czech Republic haemodialysis patient population.	Merta M, Reiterova J, Ledvinova J, PoupetovГЎ H, Dobrovolny R, RysavГЎ R, MaixnerovГЎ D, Bultas J, MotГЎn J, Slivkova J, Sobotova D, Smrzova J, Tesar V.	2007	17040996		uncertain significance,likely pathogenic,pathogenic	Variants (including SNPs and indels) imported from dbSNP
cardiovascular disease	DOID:1287	cardiovascular system disease	rs7412	dbSNP	19	44908822	44908822	A Network of Genetic Effects on Non-Demented Cognitive Aging: Alzheimer's Genetic Risk (CLU + CR1?+?PICALM) Intensifies Cognitive Aging Genetic Risk (COMT + BDNF) Selectively for APOE?4 Carriers.	Sapkota S, Dixon RA.	2018	29480189	PMC5830167	pathogenic,drug response,other	Variants (including SNPs and indels) imported from dbSNP
cardiovascular risk factors	DOID:1287	cardiovascular system disease	rs7412	dbSNP	19	44908822	44908822	A Network of Genetic Effects on Non-Demented Cognitive Aging: Alzheimer's Genetic Risk (CLU + CR1?+?PICALM) Intensifies Cognitive Aging Genetic Risk (COMT + BDNF) Selectively for APOE?4 Carriers.	Sapkota S, Dixon RA.	2018	29480189	PMC5830167	pathogenic,drug response,other	Variants (including SNPs and indels) imported from dbSNP
heart failure	DOID:114	heart disease	rs11136000	dbSNP	8	27607002	27607002	A Network of Genetic Effects on Non-Demented Cognitive Aging: Alzheimer's Genetic Risk (CLU + CR1?+?PICALM) Intensifies Cognitive Aging Genetic Risk (COMT + BDNF) Selectively for APOE?4 Carriers.	Sapkota S, Dixon RA.	2018	29480189	PMC5830167		Variants (including SNPs and indels) imported from dbSNP
cardiovascular phenotype	DOID:1287	cardiovascular system disease	rs56984562	dbSNP	1	156137666	156137666	A new c.1621 C > G, p.R541G lamin A/C mutation in a family with DCM and regional wall motion abnormalities (akinesis/dyskinesis): genotype-phenotype correlation.	Ma?ek LA, Labib S, Mazurkiewicz L, Saj M, P?oski R, Tesson F, Bili?ska ZT.	2011	21085127		not provided,pathogenic	Variants (including SNPs and indels) imported from dbSNP
cardiovascular phenotype	DOID:1287	cardiovascular system disease	rs121913637	dbSNP	14	23425971	23425971	A new common mutation in the cardiac beta-myosin heavy chain gene in Finnish patients with hypertrophic cardiomyopathy.	JГ¤Г¤skelГ¤inen P, HeliГ¶ T, Aalto-SetГ¤lГ¤ K, Kaartinen M, Ilveskoski E, HГ¤mГ¤lГ¤inen L, Melin J, KГ¤rkkГ¤inen S, Peuhkurinen K, Nieminen MS, Laakso M, FinHCM Study Group, Kuusisto J.	2014	24888384		pathogenic	Variants (including SNPs and indels) imported from dbSNP
familial hypertrophic cardiomyopathy 1	DOID:0080326	familial hypertrophic cardiomyopathy	rs121913637	dbSNP	14	23425971	23425971	A new common mutation in the cardiac beta-myosin heavy chain gene in Finnish patients with hypertrophic cardiomyopathy.	JГ¤Г¤skelГ¤inen P, HeliГ¶ T, Aalto-SetГ¤lГ¤ K, Kaartinen M, Ilveskoski E, HГ¤mГ¤lГ¤inen L, Melin J, KГ¤rkkГ¤inen S, Peuhkurinen K, Nieminen MS, Laakso M, FinHCM Study Group, Kuusisto J.	2014	24888384		pathogenic	Variants (including SNPs and indels) imported from dbSNP
cardiomyopathy	DOID:0050700	cardiomyopathy	rs727504443	dbSNP	6	7565521	7565521	A new diagnostic test for arrhythmogenic right ventricular cardiomyopathy.	Asimaki A, Tandri H, Huang H, Halushka MK, Gautam S, Basso C, Thiene G, Tsatsopoulou A, Protonotarios N, McKenna WJ, Calkins H, Saffitz JE.	2009	19279339		likely pathogenic,pathogenic	Variants (including SNPs and indels) imported from dbSNP
cardiomyopathy	DOID:0050700	cardiomyopathy	rs193922674	dbSNP	12	32802557	32802557	A new diagnostic test for arrhythmogenic right ventricular cardiomyopathy.	Asimaki A, Tandri H, Huang H, Halushka MK, Gautam S, Basso C, Thiene G, Tsatsopoulou A, Protonotarios N, McKenna WJ, Calkins H, Saffitz JE.	2009	19279339		pathogenic	Variants (including SNPs and indels) imported from dbSNP
cardiovascular phenotype	DOID:1287	cardiovascular system disease	rs193922674	dbSNP	12	32802557	32802557	A new diagnostic test for arrhythmogenic right ventricular cardiomyopathy.	Asimaki A, Tandri H, Huang H, Halushka MK, Gautam S, Basso C, Thiene G, Tsatsopoulou A, Protonotarios N, McKenna WJ, Calkins H, Saffitz JE.	2009	19279339		pathogenic	Variants (including SNPs and indels) imported from dbSNP
cardiovascular phenotype	DOID:1287	cardiovascular system disease	rs727504432	dbSNP	12	32792712	32792713	A new diagnostic test for arrhythmogenic right ventricular cardiomyopathy.	Asimaki A, Tandri H, Huang H, Halushka MK, Gautam S, Basso C, Thiene G, Tsatsopoulou A, Protonotarios N, McKenna WJ, Calkins H, Saffitz JE.	2009	19279339		likely pathogenic,pathogenic	Variants (including SNPs and indels) imported from dbSNP
cardiovascular phenotype	DOID:1287	cardiovascular system disease	rs35813871	dbSNP	2	178785681	178785681	A new disease allele for the p.C30071R mutation in titin causing hereditary myopathy with early respiratory failure.	Pfeffer G, Sambuughin N, OlivГ© M, Tyndel F, Toro C, Goldfarb LG, Chinnery PF.	2014	24444549	PMC3988992	benign,likely benign	Variants (including SNPs and indels) imported from dbSNP
cardiovascular phenotype	DOID:1287	cardiovascular system disease	rs140319117	dbSNP	2	178534344	178534344	A new disease allele for the p.C30071R mutation in titin causing hereditary myopathy with early respiratory failure.	Pfeffer G, Sambuughin N, OlivГ© M, Tyndel F, Toro C, Goldfarb LG, Chinnery PF.	2014	24444549	PMC3988992	uncertain significance,not provided,likely benign	Variants (including SNPs and indels) imported from dbSNP
cardiovascular phenotype	DOID:1287	cardiovascular system disease	rs191484894	dbSNP	2	178545939	178545939	A new disease allele for the p.C30071R mutation in titin causing hereditary myopathy with early respiratory failure.	Pfeffer G, Sambuughin N, OlivГ© M, Tyndel F, Toro C, Goldfarb LG, Chinnery PF.	2014	24444549	PMC3988992	benign	Variants (including SNPs and indels) imported from dbSNP
cardiovascular phenotype	DOID:1287	cardiovascular system disease	rs267607159	dbSNP	18	31598616	31598616	A new family with hyperthyroxinemia caused by transthyretin Val109 misdiagnosed as thyrotoxicosis and resistance to thyroid hormone--a clinical research center study.	Refetoff S, Marinov VS, Tunca H, Byrne MM, Sunthornthepvarakul T, Weiss RE.	1996	8784093		uncertain significance	Variants (including SNPs and indels) imported from dbSNP
cardiovascular phenotype	DOID:1287	cardiovascular system disease	rs120074178	dbSNP	11	2570719	2570719	A new homozygous mutation of the KCNQ1 gene associated with both Romano-Ward and incomplete Jervell Lange-Nielsen syndromes in two sisters.	Kanovsky J, Novotny T, Kadlecova J, Gaillyova R.	2010	20138589		uncertain significance,not provided,likely pathogenic,pathogenic	Variants (including SNPs and indels) imported from dbSNP
cardiomyopathy dilated with woolly hair keratoderma and tooth agenesis	DOID:0050700	cardiomyopathy	rs606231294	dbSNP	6	7571471	7571471	A new hypo/oligodontia syndrome: Carvajal/Naxos syndrome secondary to desmoplakin-dominant mutations.	Chalabreysse L, Senni F, BruyГЁre P, Aime B, Ollagnier C, Bozio A, Bouvagnet P.	2011	20940358		likely pathogenic,pathogenic	Variants (including SNPs and indels) imported from dbSNP
heart failure	DOID:114	heart disease	rs728592	dbSNP	22	47876022	47876022	A new locus on chromosome 22q13.31 linked to recessive genetic epilepsy with febrile seizures plus (GEFS+) in a Tunisian consanguineous family.	Belhedi N, Bena F, Mrabet A, Guipponi M, Souissi CB, Mrabet HK, Elgaaied AB, Malafosse A, Salzmann A.	2013	24067191	PMC3851042		Variants (including SNPs and indels) imported from dbSNP
cardiovascular phenotype	DOID:1287	cardiovascular system disease	rs137854469	dbSNP	15	48485418	48485418	A new missense mutation of fibrillin in a patient with Marfan syndrome.	Hewett DR, Lynch JR, Child A, Sykes BC.	1994	8071963	PMC1049811	likely pathogenic,pathogenic	Variants (including SNPs and indels) imported from dbSNP
cardiovascular phenotype	DOID:1287	cardiovascular system disease	rs121913641	dbSNP	14	23425970	23425970	A new missense mutation, Arg719Gln, in the beta-cardiac heavy chain myosin gene of patients with familial hypertrophic cardiomyopathy.	Consevage MW, Salada GC, Baylen BG, Ladda RL, Rogan PK.	1994	7848441		uncertain significance,likely pathogenic,pathogenic	Variants (including SNPs and indels) imported from dbSNP
familial hypertrophic cardiomyopathy 1	DOID:0080326	familial hypertrophic cardiomyopathy	rs121913641	dbSNP	14	23425970	23425970	A new missense mutation, Arg719Gln, in the beta-cardiac heavy chain myosin gene of patients with familial hypertrophic cardiomyopathy.	Consevage MW, Salada GC, Baylen BG, Ladda RL, Rogan PK.	1994	7848441		uncertain significance,likely pathogenic,pathogenic	Variants (including SNPs and indels) imported from dbSNP
cardiomyopathy with or without skeletal myopathy	DOID:0050700	cardiomyopathy	rs199474660	dbSNP	MT	3303	3303	A new mtDNA mutation in the tRNA(Leu(UUR)) gene associated with maternally inherited cardiomyopathy.	Silvestri G, Santorelli FM, Shanske S, Whitley CB, Schimmenti LA, Smith SA, DiMauro S.	1994	7906985		pathogenic	Variants (including SNPs and indels) imported from dbSNP
cardiomyopathy	DOID:0050700	cardiomyopathy	rs121918074	dbSNP	18	31595247	31595247	A new mutation causing familial amyloidotic polyneuropathy.	Skare JC, Saraiva MJ, Alves IL, Skare IB, Milunsky A, Cohen AS, Skinner M.	1989	2590199		uncertain significance,benign,likely benign	Variants (including SNPs and indels) imported from dbSNP
cardiovascular phenotype	DOID:1287	cardiovascular system disease	rs121918074	dbSNP	18	31595247	31595247	A new mutation causing familial amyloidotic polyneuropathy.	Skare JC, Saraiva MJ, Alves IL, Skare IB, Milunsky A, Cohen AS, Skinner M.	1989	2590199		uncertain significance,benign,likely benign	Variants (including SNPs and indels) imported from dbSNP
familial hypertrophic cardiomyopathy 6	DOID:0080326	familial hypertrophic cardiomyopathy	rs28938173	dbSNP	7	151568750	151568750	A new mutation in PRKAG2 gene causing hypertrophic cardiomyopathy with conduction system disease and muscular glycogenosis.	LaforГЄt P, Richard P, Said MA, Romero NB, Lacene E, Leroy JP, Baussan C, Hogrel JY, Lavergne T, Wahbi K, Hainque B, Duboc D.	2006	16487706		likely pathogenic,pathogenic	Variants (including SNPs and indels) imported from dbSNP
familial hypertrophic cardiomyopathy 6	DOID:0080326	familial hypertrophic cardiomyopathy	rs267606979	dbSNP	7	151560560	151560560	A new mutation in PRKAG2 gene causing hypertrophic cardiomyopathy with conduction system disease and muscular glycogenosis.	LaforГЄt P, Richard P, Said MA, Romero NB, Lacene E, Leroy JP, Baussan C, Hogrel JY, Lavergne T, Wahbi K, Hainque B, Duboc D.	2006	16487706		pathogenic	Variants (including SNPs and indels) imported from dbSNP
cardiovascular phenotype	DOID:1287	cardiovascular system disease	rs397516457	dbSNP	1	201365291	201365291	A new mutation of the cardiac troponin T gene causing familial hypertrophic cardiomyopathy without left ventricular hypertrophy.	Varnava A, Baboonian C, Davison F, de Cruz L, Elliott PM, Davies MJ, McKenna WJ.	1999	10525521	PMC1760789	uncertain significance,likely pathogenic,pathogenic	Variants (including SNPs and indels) imported from dbSNP
cardiovascular phenotype	DOID:1287	cardiovascular system disease	rs727503513	dbSNP	1	201365292	201365292	A new mutation of the cardiac troponin T gene causing familial hypertrophic cardiomyopathy without left ventricular hypertrophy.	Varnava A, Baboonian C, Davison F, de Cruz L, Elliott PM, Davies MJ, McKenna WJ.	1999	10525521	PMC1760789	likely pathogenic,pathogenic	Variants (including SNPs and indels) imported from dbSNP
familial hypertrophic cardiomyopathy 2	DOID:0080326	familial hypertrophic cardiomyopathy	rs397516457	dbSNP	1	201365291	201365291	A new mutation of the cardiac troponin T gene causing familial hypertrophic cardiomyopathy without left ventricular hypertrophy.	Varnava A, Baboonian C, Davison F, de Cruz L, Elliott PM, Davies MJ, McKenna WJ.	1999	10525521	PMC1760789	uncertain significance,likely pathogenic,pathogenic	Variants (including SNPs and indels) imported from dbSNP
familial hypertrophic cardiomyopathy 2	DOID:0080326	familial hypertrophic cardiomyopathy	rs727503513	dbSNP	1	201365292	201365292	A new mutation of the cardiac troponin T gene causing familial hypertrophic cardiomyopathy without left ventricular hypertrophy.	Varnava A, Baboonian C, Davison F, de Cruz L, Elliott PM, Davies MJ, McKenna WJ.	1999	10525521	PMC1760789	likely pathogenic,pathogenic	Variants (including SNPs and indels) imported from dbSNP
cardiovascular disease	DOID:1287	cardiovascular system disease	rs7412	dbSNP	19	44908822	44908822	A New Pharmacogenetic Algorithm to Predict the Most Appropriate Dosage of Acenocoumarol for Stable Anticoagulation in a Mixed Spanish Population.	Tong HY, DГЎvila-Fajardo CL, Borobia AM, MartГ­nez-GonzГЎlez LJ, Lubomirov R, Perea LeГіn LM, Blanco BaГ±ares MJ, DГ­az-VillamarГ­n X, FernГЎndez-CapitГЎn C, Cabeza Barrera J, Carcas AJ, PGX-ACE Investigators Group.	2016	26977927	PMC4792430	pathogenic,drug response,other	Variants (including SNPs and indels) imported from dbSNP
cardiovascular risk factors	DOID:1287	cardiovascular system disease	rs7412	dbSNP	19	44908822	44908822	A New Pharmacogenetic Algorithm to Predict the Most Appropriate Dosage of Acenocoumarol for Stable Anticoagulation in a Mixed Spanish Population.	Tong HY, DГЎvila-Fajardo CL, Borobia AM, MartГ­nez-GonzГЎlez LJ, Lubomirov R, Perea LeГіn LM, Blanco BaГ±ares MJ, DГ­az-VillamarГ­n X, FernГЎndez-CapitГЎn C, Cabeza Barrera J, Carcas AJ, PGX-ACE Investigators Group.	2016	26977927	PMC4792430	pathogenic,drug response,other	Variants (including SNPs and indels) imported from dbSNP
cardiomyopathy	DOID:0050700	cardiomyopathy	rs121918074	dbSNP	18	31595247	31595247	A new transthyretin variant from a patient with familial amyloidotic polyneuropathy has asparagine substituted for histidine at position 90.	Skare JC, Milunsky JM, Milunsky A, Skare IB, Cohen AS, Skinner M.	1991	1997217		uncertain significance,benign,likely benign	Variants (including SNPs and indels) imported from dbSNP
cardiovascular phenotype	DOID:1287	cardiovascular system disease	rs121918074	dbSNP	18	31595247	31595247	A new transthyretin variant from a patient with familial amyloidotic polyneuropathy has asparagine substituted for histidine at position 90.	Skare JC, Milunsky JM, Milunsky A, Skare IB, Cohen AS, Skinner M.	1991	1997217		uncertain significance,benign,likely benign	Variants (including SNPs and indels) imported from dbSNP
cardiovascular phenotype	DOID:1287	cardiovascular system disease	rs397515963	dbSNP	11	47337730	47337730	A newly created splice donor site in exon 25 of the MyBP-C gene is responsible for inherited hypertrophic cardiomyopathy with incomplete disease penetrance.	Moolman JA, Reith S, Uhl K, Bailey S, Gautel M, Jeschke B, Fischer C, Ochs J, McKenna WJ, Klues H, Vosberg HP.	2000	10736283		pathogenic	Variants (including SNPs and indels) imported from dbSNP
familial hypertrophic cardiomyopathy 1	DOID:0080326	familial hypertrophic cardiomyopathy	rs397515963	dbSNP	11	47337730	47337730	A newly created splice donor site in exon 25 of the MyBP-C gene is responsible for inherited hypertrophic cardiomyopathy with incomplete disease penetrance.	Moolman JA, Reith S, Uhl K, Bailey S, Gautel M, Jeschke B, Fischer C, Ochs J, McKenna WJ, Klues H, Vosberg HP.	2000	10736283		pathogenic	Variants (including SNPs and indels) imported from dbSNP
familial hypertrophic cardiomyopathy 4	DOID:0080326	familial hypertrophic cardiomyopathy	rs397515963	dbSNP	11	47337730	47337730	A newly created splice donor site in exon 25 of the MyBP-C gene is responsible for inherited hypertrophic cardiomyopathy with incomplete disease penetrance.	Moolman JA, Reith S, Uhl K, Bailey S, Gautel M, Jeschke B, Fischer C, Ochs J, McKenna WJ, Klues H, Vosberg HP.	2000	10736283		pathogenic	Variants (including SNPs and indels) imported from dbSNP
cardiovascular disease	DOID:1287	cardiovascular system disease	rs7412	dbSNP	19	44908822	44908822	A non-invasive, rapid method to genotype late-onset Alzheimer's disease-related apolipoprotein E gene polymorphisms.	Yi L, Wu T, Luo W, Zhou W, Wu J.	2014	25206745	PMC4146311	pathogenic,drug response,other	Variants (including SNPs and indels) imported from dbSNP
cardiovascular risk factors	DOID:1287	cardiovascular system disease	rs7412	dbSNP	19	44908822	44908822	A non-invasive, rapid method to genotype late-onset Alzheimer's disease-related apolipoprotein E gene polymorphisms.	Yi L, Wu T, Luo W, Zhou W, Wu J.	2014	25206745	PMC4146311	pathogenic,drug response,other	Variants (including SNPs and indels) imported from dbSNP
cardiovascular phenotype	DOID:1287	cardiovascular system disease	rs1805128	dbSNP	21	34449382	34449382	A non-synonymous single nucleotide polymorphism in an OPRM1 splice variant is associated with fentanyl-induced emesis in women undergoing minor gynaecological surgery.	Pang GS, Ithnin F, Wong YY, Wang JB, Lim Y, Sia AT, Lee CG.	2012	23144877	PMC3492352	likely benign,pathogenic,risk factor	Variants (including SNPs and indels) imported from dbSNP
cardiovascular disease	DOID:1287	cardiovascular system disease	rs1229984	dbSNP	4	99318162	99318162	A non-synonymous variant in ADH1B is strongly associated with prenatal alcohol use in a European sample of pregnant women.	Zuccolo L, Fitz-Simon N, Gray R, Ring SM, Sayal K, Smith GD, Lewis SJ.	2009	19687126	PMC2766294	protective	Variants (including SNPs and indels) imported from dbSNP
cardiovascular disease	DOID:1287	cardiovascular system disease	rs6021247	dbSNP	20	51492442	51492442	A nonsense mutation in COQ9 causes autosomal-recessive neonatal-onset primary coenzyme Q10 deficiency: a potentially treatable form of mitochondrial disease.	Duncan AJ, Bitner-Glindzicz M, Meunier B, Costello H, Hargreaves IP, LГіpez LC, Hirano M, Quinzii CM, Sadowski MI, Hardy J, Singleton A, Clayton PT, Rahman S.	2009	19375058	PMC2681001		Variants (including SNPs and indels) imported from dbSNP
cardiovascular disease	DOID:1287	cardiovascular system disease	rs7412	dbSNP	19	44908822	44908822	A note on the use of the generalized odds ratio in meta-analysis of association studies involving bi- and tri-allelic polymorphisms.	Pereira TV, Mingroni-Netto RC.	2011	21645382	PMC3146434	pathogenic,drug response,other	Variants (including SNPs and indels) imported from dbSNP
cardiovascular risk factors	DOID:1287	cardiovascular system disease	rs7412	dbSNP	19	44908822	44908822	A note on the use of the generalized odds ratio in meta-analysis of association studies involving bi- and tri-allelic polymorphisms.	Pereira TV, Mingroni-Netto RC.	2011	21645382	PMC3146434	pathogenic,drug response,other	Variants (including SNPs and indels) imported from dbSNP
atrial fibrillation	DOID:0060224	atrial fibrillation	rs1805123	dbSNP	7	150948446	150948446	A novel and lethal de novo LQT-3 mutation in a newborn with distinct molecular pharmacology and therapeutic response.	Bankston JR, Yue M, Chung W, Spyres M, Pass RH, Silver E, Sampson KJ, Kass RS.	2007	18060054	PMC2082660	uncertain significance,benign,likely benign	Variants (including SNPs and indels) imported from dbSNP
cardiovascular phenotype	DOID:1287	cardiovascular system disease	rs1805123	dbSNP	7	150948446	150948446	A novel and lethal de novo LQT-3 mutation in a newborn with distinct molecular pharmacology and therapeutic response.	Bankston JR, Yue M, Chung W, Spyres M, Pass RH, Silver E, Sampson KJ, Kass RS.	2007	18060054	PMC2082660	uncertain significance,benign,likely benign	Variants (including SNPs and indels) imported from dbSNP
cardiovascular disease	DOID:1287	cardiovascular system disease	rs7412	dbSNP	19	44908822	44908822	A novel approach for multi-SNP GWAS and its application in Alzheimer's disease.	Bodily PM, Fujimoto MS, Page JT, Clement MJ, Ebbert MT, Ridge PG, AlzheimerвЂ™s Disease Neuroimaging Initiative.	2016	27453991	PMC4965706	pathogenic,drug response,other	Variants (including SNPs and indels) imported from dbSNP
cardiovascular risk factors	DOID:1287	cardiovascular system disease	rs7412	dbSNP	19	44908822	44908822	A novel approach for multi-SNP GWAS and its application in Alzheimer's disease.	Bodily PM, Fujimoto MS, Page JT, Clement MJ, Ebbert MT, Ridge PG, AlzheimerвЂ™s Disease Neuroimaging Initiative.	2016	27453991	PMC4965706	pathogenic,drug response,other	Variants (including SNPs and indels) imported from dbSNP
cardiomyopathy	DOID:0050700	cardiomyopathy	rs483352832	dbSNP	1	201364327	201364327	A novel arginine to tryptophan (R144W) mutation in troponin T (cTnT) gene in an indian multigenerational family with dilated cardiomyopathy (FDCM).	Rani DS, Dhandapany PS, Nallari P, Narasimhan C, Thangaraj K.	2014	24992688	PMC4081629	uncertain significance,likely pathogenic,pathogenic	Variants (including SNPs and indels) imported from dbSNP
cardiomyopathy	DOID:0050700	cardiomyopathy	rs483352833	dbSNP	1	201363374	201363374	A novel arginine to tryptophan (R144W) mutation in troponin T (cTnT) gene in an indian multigenerational family with dilated cardiomyopathy (FDCM).	Rani DS, Dhandapany PS, Nallari P, Narasimhan C, Thangaraj K.	2014	24992688	PMC4081629	uncertain significance,benign	Variants (including SNPs and indels) imported from dbSNP
cardiomyopathy	DOID:0050700	cardiomyopathy	rs3729547	dbSNP	1	201365254	201365254	A novel arginine to tryptophan (R144W) mutation in troponin T (cTnT) gene in an indian multigenerational family with dilated cardiomyopathy (FDCM).	Rani DS, Dhandapany PS, Nallari P, Narasimhan C, Thangaraj K.	2014	24992688	PMC4081629	benign,likely benign	Variants (including SNPs and indels) imported from dbSNP
cardiomyopathy	DOID:0050700	cardiomyopathy	rs3729845	dbSNP	1	201365667	201365667	A novel arginine to tryptophan (R144W) mutation in troponin T (cTnT) gene in an indian multigenerational family with dilated cardiomyopathy (FDCM).	Rani DS, Dhandapany PS, Nallari P, Narasimhan C, Thangaraj K.	2014	24992688	PMC4081629	benign,likely benign	Variants (including SNPs and indels) imported from dbSNP
cardiovascular phenotype	DOID:1287	cardiovascular system disease	rs3729547	dbSNP	1	201365254	201365254	A novel arginine to tryptophan (R144W) mutation in troponin T (cTnT) gene in an indian multigenerational family with dilated cardiomyopathy (FDCM).	Rani DS, Dhandapany PS, Nallari P, Narasimhan C, Thangaraj K.	2014	24992688	PMC4081629	benign,likely benign	Variants (including SNPs and indels) imported from dbSNP
cardiovascular phenotype	DOID:1287	cardiovascular system disease	rs3729845	dbSNP	1	201365667	201365667	A novel arginine to tryptophan (R144W) mutation in troponin T (cTnT) gene in an indian multigenerational family with dilated cardiomyopathy (FDCM).	Rani DS, Dhandapany PS, Nallari P, Narasimhan C, Thangaraj K.	2014	24992688	PMC4081629	benign,likely benign	Variants (including SNPs and indels) imported from dbSNP
familial hypertrophic cardiomyopathy 2	DOID:0080326	familial hypertrophic cardiomyopathy	rs483352832	dbSNP	1	201364327	201364327	A novel arginine to tryptophan (R144W) mutation in troponin T (cTnT) gene in an indian multigenerational family with dilated cardiomyopathy (FDCM).	Rani DS, Dhandapany PS, Nallari P, Narasimhan C, Thangaraj K.	2014	24992688	PMC4081629	uncertain significance,likely pathogenic,pathogenic	Variants (including SNPs and indels) imported from dbSNP
familial hypertrophic cardiomyopathy 2	DOID:0080326	familial hypertrophic cardiomyopathy	rs483352833	dbSNP	1	201363374	201363374	A novel arginine to tryptophan (R144W) mutation in troponin T (cTnT) gene in an indian multigenerational family with dilated cardiomyopathy (FDCM).	Rani DS, Dhandapany PS, Nallari P, Narasimhan C, Thangaraj K.	2014	24992688	PMC4081629	uncertain significance,benign	Variants (including SNPs and indels) imported from dbSNP
familial hypertrophic cardiomyopathy 2	DOID:0080326	familial hypertrophic cardiomyopathy	rs483352835	dbSNP	1	201362395	201362395	A novel arginine to tryptophan (R144W) mutation in troponin T (cTnT) gene in an indian multigenerational family with dilated cardiomyopathy (FDCM).	Rani DS, Dhandapany PS, Nallari P, Narasimhan C, Thangaraj K.	2014	24992688	PMC4081629	uncertain significance	Variants (including SNPs and indels) imported from dbSNP
familial hypertrophic cardiomyopathy 2	DOID:0080326	familial hypertrophic cardiomyopathy	rs45576939	dbSNP	1	201368308	201368308	A novel arginine to tryptophan (R144W) mutation in troponin T (cTnT) gene in an indian multigenerational family with dilated cardiomyopathy (FDCM).	Rani DS, Dhandapany PS, Nallari P, Narasimhan C, Thangaraj K.	2014	24992688	PMC4081629	likely benign	Variants (including SNPs and indels) imported from dbSNP
cardiovascular disease risk factors	DOID:1287	cardiovascular system disease	rs1800562	dbSNP	6	26092913	26092913	A novel association between a SNP in CYBRD1 and serum ferritin levels in a cohort study of HFE hereditary haemochromatosis.	Constantine CC, Anderson GJ, Vulpe CD, McLaren CE, Bahlo M, Yeap HL, Gertig DM, Osborne NJ, Bertalli NA, Beckman KB, Chen V, Matak P, McKie AT, Delatycki MB, Olynyk JK, English DR, Southey MC, Giles GG, Hopper JL, Allen KJ, Gurrin LC.	2009	19673882	PMC2767327	uncertain significance,pathogenic,risk factor,association	Variants (including SNPs and indels) imported from dbSNP
cardiovascular phenotype	DOID:1287	cardiovascular system disease	rs397516127	dbSNP	14	23426834	23426834	A novel cardiac myosin-binding protein C S297X mutation in hypertrophic cardiomyopathy.	Hirota T, Kubo T, Kitaoka H, Hamada T, Baba Y, Hayato K, Okawa M, Yamasaki N, Matsumura Y, Yabe T, Doi YL.	2010	20350521		likely pathogenic,pathogenic	Variants (including SNPs and indels) imported from dbSNP
familial hypertrophic cardiomyopathy 1	DOID:0080326	familial hypertrophic cardiomyopathy	rs397516127	dbSNP	14	23426834	23426834	A novel cardiac myosin-binding protein C S297X mutation in hypertrophic cardiomyopathy.	Hirota T, Kubo T, Kitaoka H, Hamada T, Baba Y, Hayato K, Okawa M, Yamasaki N, Matsumura Y, Yabe T, Doi YL.	2010	20350521		likely pathogenic,pathogenic	Variants (including SNPs and indels) imported from dbSNP
cardiovascular phenotype	DOID:1287	cardiovascular system disease	rs121918095	dbSNP	18	31598602	31598602	A novel compound heterozygote (FAP ATTR Arg104His/ATTR Val30Met) with high serum transthyretin (TTR) and retinol binding protein (RBP) levels.	Terazaki H, Ando Y, Misumi S, Nakamura M, Ando E, Matsunaga N, Shoji S, Okuyama M, Ideta H, Nakagawa K, Ishizaki T, Ando M, Saraiva MJ.	1999	10529370		benign,likely benign	Variants (including SNPs and indels) imported from dbSNP
cardiovascular phenotype	DOID:1287	cardiovascular system disease	rs150516929	dbSNP	11	111908832	111908832	A novel CRYAB mutation resulting in multisystemic disease.	Sacconi S, FГ©asson L, Antoine JC, PГ©cheux C, Bernard R, Cobo AM, Casarin A, Salviati L, Desnuelle C, Urtizberea A.	2012	21920752		uncertain significance,likely benign	Variants (including SNPs and indels) imported from dbSNP
atrial septal defect 7 with or without atrioventricular conduction defects	DOID:1882	atrial heart septal defect	rs104893907	dbSNP	5	173232776	173232776	A novel CSX/NKX2-5 mutation causes autosomal-dominant AV block: are atrial fibrillation and syncopes part of the phenotype?	Gutierrez-Roelens I, De Roy L, Ovaert C, Sluysmans T, Devriendt K, Brunner HG, Vikkula M.	2006	16896344		pathogenic	Variants (including SNPs and indels) imported from dbSNP
cardiomyopathy	DOID:0050700	cardiomyopathy	rs45550635	dbSNP	11	19192439	19192439	A novel custom resequencing array for dilated cardiomyopathy.	Zimmerman RS, Cox S, Lakdawala NK, Cirino A, Mancini-DiNardo D, Clark E, Leon A, Duffy E, White E, Baxter S, Alaamery M, Farwell L, Weiss S, Seidman CE, Seidman JG, Ho CY, Rehm HL, Funke BH.	2010	20474083	PMC3018746	uncertain significance,benign,likely benign	Variants (including SNPs and indels) imported from dbSNP
cardiomyopathy	DOID:0050700	cardiomyopathy	rs73991549	dbSNP	2	219425952	219425952	A novel custom resequencing array for dilated cardiomyopathy.	Zimmerman RS, Cox S, Lakdawala NK, Cirino A, Mancini-DiNardo D, Clark E, Leon A, Duffy E, White E, Baxter S, Alaamery M, Farwell L, Weiss S, Seidman CE, Seidman JG, Ho CY, Rehm HL, Funke BH.	2010	20474083	PMC3018746	not provided,benign,likely benign	Variants (including SNPs and indels) imported from dbSNP
cardiomyopathy	DOID:0050700	cardiomyopathy	rs61688134	dbSNP	12	21864476	21864476	A novel custom resequencing array for dilated cardiomyopathy.	Zimmerman RS, Cox S, Lakdawala NK, Cirino A, Mancini-DiNardo D, Clark E, Leon A, Duffy E, White E, Baxter S, Alaamery M, Farwell L, Weiss S, Seidman CE, Seidman JG, Ho CY, Rehm HL, Funke BH.	2010	20474083	PMC3018746	benign,likely benign	Variants (including SNPs and indels) imported from dbSNP
cardiomyopathy	DOID:0050700	cardiomyopathy	rs147895473	dbSNP	12	21842378	21842378	A novel custom resequencing array for dilated cardiomyopathy.	Zimmerman RS, Cox S, Lakdawala NK, Cirino A, Mancini-DiNardo D, Clark E, Leon A, Duffy E, White E, Baxter S, Alaamery M, Farwell L, Weiss S, Seidman CE, Seidman JG, Ho CY, Rehm HL, Funke BH.	2010	20474083	PMC3018746	benign	Variants (including SNPs and indels) imported from dbSNP
cardiomyopathy	DOID:0050700	cardiomyopathy	rs397516247	dbSNP	14	23415174	23415174	A novel custom resequencing array for dilated cardiomyopathy.	Zimmerman RS, Cox S, Lakdawala NK, Cirino A, Mancini-DiNardo D, Clark E, Leon A, Duffy E, White E, Baxter S, Alaamery M, Farwell L, Weiss S, Seidman CE, Seidman JG, Ho CY, Rehm HL, Funke BH.	2010	20474083	PMC3018746	uncertain significance,likely pathogenic	Variants (including SNPs and indels) imported from dbSNP
cardiovascular phenotype	DOID:1287	cardiovascular system disease	rs777744290	dbSNP	1	236757525	236757525	A novel custom resequencing array for dilated cardiomyopathy.	Zimmerman RS, Cox S, Lakdawala NK, Cirino A, Mancini-DiNardo D, Clark E, Leon A, Duffy E, White E, Baxter S, Alaamery M, Farwell L, Weiss S, Seidman CE, Seidman JG, Ho CY, Rehm HL, Funke BH.	2010	20474083	PMC3018746	uncertain significance	Variants (including SNPs and indels) imported from dbSNP
cardiovascular phenotype	DOID:1287	cardiovascular system disease	rs397515925	dbSNP	11	47351344	47351357	A novel custom resequencing array for dilated cardiomyopathy.	Zimmerman RS, Cox S, Lakdawala NK, Cirino A, Mancini-DiNardo D, Clark E, Leon A, Duffy E, White E, Baxter S, Alaamery M, Farwell L, Weiss S, Seidman CE, Seidman JG, Ho CY, Rehm HL, Funke BH.	2010	20474083	PMC3018746	pathogenic	Variants (including SNPs and indels) imported from dbSNP
cardiovascular phenotype	DOID:1287	cardiovascular system disease	rs71579374	dbSNP	10	74100982	74100982	A novel custom resequencing array for dilated cardiomyopathy.	Zimmerman RS, Cox S, Lakdawala NK, Cirino A, Mancini-DiNardo D, Clark E, Leon A, Duffy E, White E, Baxter S, Alaamery M, Farwell L, Weiss S, Seidman CE, Seidman JG, Ho CY, Rehm HL, Funke BH.	2010	20474083	PMC3018746	uncertain significance,benign,likely benign	Variants (including SNPs and indels) imported from dbSNP
cardiovascular phenotype	DOID:1287	cardiovascular system disease	rs45550635	dbSNP	11	19192439	19192439	A novel custom resequencing array for dilated cardiomyopathy.	Zimmerman RS, Cox S, Lakdawala NK, Cirino A, Mancini-DiNardo D, Clark E, Leon A, Duffy E, White E, Baxter S, Alaamery M, Farwell L, Weiss S, Seidman CE, Seidman JG, Ho CY, Rehm HL, Funke BH.	2010	20474083	PMC3018746	uncertain significance,benign,likely benign	Variants (including SNPs and indels) imported from dbSNP
cardiovascular phenotype	DOID:1287	cardiovascular system disease	rs41272699	dbSNP	2	219420154	219420154	A novel custom resequencing array for dilated cardiomyopathy.	Zimmerman RS, Cox S, Lakdawala NK, Cirino A, Mancini-DiNardo D, Clark E, Leon A, Duffy E, White E, Baxter S, Alaamery M, Farwell L, Weiss S, Seidman CE, Seidman JG, Ho CY, Rehm HL, Funke BH.	2010	20474083	PMC3018746	uncertain significance,benign,likely benign,pathogenic	Variants (including SNPs and indels) imported from dbSNP
cardiovascular phenotype	DOID:1287	cardiovascular system disease	rs73991549	dbSNP	2	219425952	219425952	A novel custom resequencing array for dilated cardiomyopathy.	Zimmerman RS, Cox S, Lakdawala NK, Cirino A, Mancini-DiNardo D, Clark E, Leon A, Duffy E, White E, Baxter S, Alaamery M, Farwell L, Weiss S, Seidman CE, Seidman JG, Ho CY, Rehm HL, Funke BH.	2010	20474083	PMC3018746	not provided,benign,likely benign	Variants (including SNPs and indels) imported from dbSNP
cardiovascular phenotype	DOID:1287	cardiovascular system disease	rs61688134	dbSNP	12	21864476	21864476	A novel custom resequencing array for dilated cardiomyopathy.	Zimmerman RS, Cox S, Lakdawala NK, Cirino A, Mancini-DiNardo D, Clark E, Leon A, Duffy E, White E, Baxter S, Alaamery M, Farwell L, Weiss S, Seidman CE, Seidman JG, Ho CY, Rehm HL, Funke BH.	2010	20474083	PMC3018746	benign,likely benign	Variants (including SNPs and indels) imported from dbSNP
familial hypertrophic cardiomyopathy 12	DOID:0080326	familial hypertrophic cardiomyopathy	rs145300736	dbSNP	11	19188269	19188269	A novel custom resequencing array for dilated cardiomyopathy.	Zimmerman RS, Cox S, Lakdawala NK, Cirino A, Mancini-DiNardo D, Clark E, Leon A, Duffy E, White E, Baxter S, Alaamery M, Farwell L, Weiss S, Seidman CE, Seidman JG, Ho CY, Rehm HL, Funke BH.	2010	20474083	PMC3018746	uncertain significance	Variants (including SNPs and indels) imported from dbSNP
familial hypertrophic cardiomyopathy 12	DOID:0080326	familial hypertrophic cardiomyopathy	rs45550635	dbSNP	11	19192439	19192439	A novel custom resequencing array for dilated cardiomyopathy.	Zimmerman RS, Cox S, Lakdawala NK, Cirino A, Mancini-DiNardo D, Clark E, Leon A, Duffy E, White E, Baxter S, Alaamery M, Farwell L, Weiss S, Seidman CE, Seidman JG, Ho CY, Rehm HL, Funke BH.	2010	20474083	PMC3018746	uncertain significance,benign,likely benign	Variants (including SNPs and indels) imported from dbSNP
familial hypertrophic cardiomyopathy 4	DOID:0080326	familial hypertrophic cardiomyopathy	rs397516050	dbSNP	11	47350077	47350077	A novel custom resequencing array for dilated cardiomyopathy.	Zimmerman RS, Cox S, Lakdawala NK, Cirino A, Mancini-DiNardo D, Clark E, Leon A, Duffy E, White E, Baxter S, Alaamery M, Farwell L, Weiss S, Seidman CE, Seidman JG, Ho CY, Rehm HL, Funke BH.	2010	20474083	PMC3018746	uncertain significance	Variants (including SNPs and indels) imported from dbSNP
cardiomyopathy	DOID:0050700	cardiomyopathy	rs72648927	dbSNP	2	178734940	178734940	A novel dominant D109A CRYAB mutation in a family with myofibrillar myopathy affects ?B-crystallin structure.	Fichna JP, Potulska-Chromik A, Miszta P, Redowicz MJ, Kaminska AM, Zekanowski C, Filipek S.	2017	27904835	PMC5124346	benign,likely benign	Variants (including SNPs and indels) imported from dbSNP
cardiomyopathy	DOID:0050700	cardiomyopathy	rs72648937	dbSNP	2	178732873	178732873	A novel dominant D109A CRYAB mutation in a family with myofibrillar myopathy affects ?B-crystallin structure.	Fichna JP, Potulska-Chromik A, Miszta P, Redowicz MJ, Kaminska AM, Zekanowski C, Filipek S.	2017	27904835	PMC5124346	uncertain significance,benign,likely benign	Variants (including SNPs and indels) imported from dbSNP
cardiovascular phenotype	DOID:1287	cardiovascular system disease	rs72648927	dbSNP	2	178734940	178734940	A novel dominant D109A CRYAB mutation in a family with myofibrillar myopathy affects ?B-crystallin structure.	Fichna JP, Potulska-Chromik A, Miszta P, Redowicz MJ, Kaminska AM, Zekanowski C, Filipek S.	2017	27904835	PMC5124346	benign,likely benign	Variants (including SNPs and indels) imported from dbSNP
cardiovascular phenotype	DOID:1287	cardiovascular system disease	rs72648937	dbSNP	2	178732873	178732873	A novel dominant D109A CRYAB mutation in a family with myofibrillar myopathy affects ?B-crystallin structure.	Fichna JP, Potulska-Chromik A, Miszta P, Redowicz MJ, Kaminska AM, Zekanowski C, Filipek S.	2017	27904835	PMC5124346	uncertain significance,benign,likely benign	Variants (including SNPs and indels) imported from dbSNP
cardiovascular disease	DOID:1287	cardiovascular system disease	rs7412	dbSNP	19	44908822	44908822	A novel electrophoretic variant of human apolipoprotein E. Identification and characterization of apolipoprotein E1.	Weisgraber KH, Rall SC, Innerarity TL, Mahley RW, Kuusi T, Ehnholm C.	1984	6323533	PMC425115	pathogenic,drug response,other	Variants (including SNPs and indels) imported from dbSNP
cardiovascular risk factors	DOID:1287	cardiovascular system disease	rs7412	dbSNP	19	44908822	44908822	A novel electrophoretic variant of human apolipoprotein E. Identification and characterization of apolipoprotein E1.	Weisgraber KH, Rall SC, Innerarity TL, Mahley RW, Kuusi T, Ehnholm C.	1984	6323533	PMC425115	pathogenic,drug response,other	Variants (including SNPs and indels) imported from dbSNP
cardiovascular phenotype	DOID:1287	cardiovascular system disease	rs397514558	dbSNP	15	48490013	48490013	A novel FBN1 mutation in a Chinese family with isolated ectopia lentis.	Yang G, Chu M, Zhai X, Zhao J.	2012	22539873	PMC3335778	pathogenic	Variants (including SNPs and indels) imported from dbSNP
cardiovascular phenotype	DOID:1287	cardiovascular system disease	rs25458	dbSNP	15	48505110	48505110	A novel fibrillin-1 gene missense mutation associated with neonatal Marfan syndrome: a case report and review of the mutation spectrum.	Peng Q, Deng Y, Yang Y, Liu H.	2016	27138491	PMC4852411	benign	Variants (including SNPs and indels) imported from dbSNP
cardiovascular phenotype	DOID:1287	cardiovascular system disease	rs140598	dbSNP	15	48487333	48487333	A novel fibrillin-1 gene missense mutation associated with neonatal Marfan syndrome: a case report and review of the mutation spectrum.	Peng Q, Deng Y, Yang Y, Liu H.	2016	27138491	PMC4852411	benign	Variants (including SNPs and indels) imported from dbSNP
cardiovascular phenotype	DOID:1287	cardiovascular system disease	rs11853943	dbSNP	15	48487205	48487205	A novel fibrillin-1 gene missense mutation associated with neonatal Marfan syndrome: a case report and review of the mutation spectrum.	Peng Q, Deng Y, Yang Y, Liu H.	2016	27138491	PMC4852411	benign	Variants (including SNPs and indels) imported from dbSNP
cardiovascular phenotype	DOID:1287	cardiovascular system disease	rs11603779	dbSNP	11	111910323	111910323	A novel frameshift mutation in CX46 associated with hereditary dominant cataracts in a Chinese family.	Cui XK, Zhu KK, Zhou Z, Wan SM, Dong Y, Wang XC, Li J, Zhang J, Mu HM, Qin L, Hu YZ.	2017	28546921	PMC5437452	uncertain significance,benign	Variants (including SNPs and indels) imported from dbSNP
cardiovascular phenotype	DOID:1287	cardiovascular system disease	rs387906770	dbSNP	8	11708439	11708439	A novel GATA4 loss-of-function mutation associated with congenital ventricular septal defect.	Yang YQ, Li L, Wang J, Liu XY, Chen XZ, Zhang W, Wang XZ, Jiang JQ, Liu X, Fang WY.	2012	22101736		uncertain significance,pathogenic	Variants (including SNPs and indels) imported from dbSNP
cardiovascular phenotype	DOID:1287	cardiovascular system disease	rs387906770	dbSNP	CHR_HG76_PATCH	8244377	8244377	A novel GATA4 loss-of-function mutation associated with congenital ventricular septal defect.	Yang YQ, Li L, Wang J, Liu XY, Chen XZ, Zhang W, Wang XZ, Jiang JQ, Liu X, Fang WY.	2012	22101736		uncertain significance,pathogenic	Variants (including SNPs and indels) imported from dbSNP
atrial septal defect 2	DOID:1882	atrial heart septal defect	rs104894073	dbSNP	8	11750213	11750213	A novel GATA4 mutation responsible for congenital ventricular septal defects.	Wang J, Fang M, Liu XY, Xin YF, Liu ZM, Chen XZ, Wang XZ, Fang WY, Liu X, Yang YQ.	2011	21637914		pathogenic	Variants (including SNPs and indels) imported from dbSNP
atrial septal defect 2	DOID:1882	atrial heart septal defect	rs104894073	dbSNP	CHR_HG76_PATCH	8202601	8202601	A novel GATA4 mutation responsible for congenital ventricular septal defects.	Wang J, Fang M, Liu XY, Xin YF, Liu ZM, Chen XZ, Wang XZ, Fang WY, Liu X, Yang YQ.	2011	21637914		pathogenic	Variants (including SNPs and indels) imported from dbSNP
atrial septal defect 9	DOID:1882	atrial heart septal defect	rs387906816	dbSNP	18	22171695	22171695	A novel GATA6 mutation in patients with tetralogy of Fallot or atrial septal defect.	Lin X, Huo Z, Liu X, Zhang Y, Li L, Zhao H, Yan B, Liu Y, Yang Y, Chen YH.	2010	20631719		pathogenic	Variants (including SNPs and indels) imported from dbSNP
cardiovascular disease	DOID:1287	cardiovascular system disease	rs1801253	dbSNP	10	114045297	114045297	A novel gene-environment interaction involved in endometriosis.	McCarty CA, Berg RL, Welter JD, Kitchner TE, Kemnitz JW.	2012	22024213	PMC3582186	drug response	Variants (including SNPs and indels) imported from dbSNP
cardiovascular disease	DOID:1287	cardiovascular system disease	rs7412	dbSNP	19	44908822	44908822	A novel gene-environment interaction involved in endometriosis.	McCarty CA, Berg RL, Welter JD, Kitchner TE, Kemnitz JW.	2012	22024213	PMC3582186	pathogenic,drug response,other	Variants (including SNPs and indels) imported from dbSNP
cardiovascular phenotype	DOID:1287	cardiovascular system disease	rs234706	dbSNP	21	43065240	43065240	A novel gene-environment interaction involved in endometriosis.	McCarty CA, Berg RL, Welter JD, Kitchner TE, Kemnitz JW.	2012	22024213	PMC3582186	benign	Variants (including SNPs and indels) imported from dbSNP
cardiovascular risk factors	DOID:1287	cardiovascular system disease	rs7412	dbSNP	19	44908822	44908822	A novel gene-environment interaction involved in endometriosis.	McCarty CA, Berg RL, Welter JD, Kitchner TE, Kemnitz JW.	2012	22024213	PMC3582186	pathogenic,drug response,other	Variants (including SNPs and indels) imported from dbSNP
cardiofaciocutaneous syndrome 3	DOID:0060233	cardiofaciocutaneous syndrome	rs797044593	dbSNP	15	66436759	66436759	A novel heterozygous MAP2K1 mutation in a patient with Noonan syndrome with multiple lentigines.	Nishi E, Mizuno S, Nanjo Y, Niihori T, Fukushima Y, Matsubara Y, Aoki Y, Kosho T.	2015	25423878		pathogenic	Variants (including SNPs and indels) imported from dbSNP
cardiovascular disease risk factors	DOID:1287	cardiovascular system disease	rs1800562	dbSNP	6	26092913	26092913	A novel HFE mutation (c.del478) results in nonsense-mediated decay of the mutant transcript in a hemochromatosis patient.	Pointon JJ, Lok CY, Shearman JD, Suckling RJ, Rochette J, Merryweather-Clarke AT, Robson KJ.	2009	19477142		uncertain significance,pathogenic,risk factor,association	Variants (including SNPs and indels) imported from dbSNP
cardiomyopathy hypertrophic mitochondrial	DOID:0050700	cardiomyopathy	rs3134560	dbSNP	MT	12192	12192	A novel homoplasmic mutation in mtDNA with a single evolutionary origin as a risk factor for cardiomyopathy.	Shin WS, Tanaka M, Suzuki J, Hemmi C, Toyo-oka T.	2000	11038324	PMC1287941	pathogenic	Variants (including SNPs and indels) imported from dbSNP
cardiomyopathy idiopathic dilated mitochondrial	DOID:0050700	cardiomyopathy	rs3134560	dbSNP	MT	12192	12192	A novel homoplasmic mutation in mtDNA with a single evolutionary origin as a risk factor for cardiomyopathy.	Shin WS, Tanaka M, Suzuki J, Hemmi C, Toyo-oka T.	2000	11038324	PMC1287941	pathogenic	Variants (including SNPs and indels) imported from dbSNP
cardiomyopathy	DOID:0050700	cardiomyopathy	rs4641	dbSNP	1	156137743	156137743	A novel homozygous LMNA mutation (p.Met540Ile) causes mandibuloacral dysplasia type A.	Yassaee VR, Khojaste A, Hashemi-Gorji F, Ravesh Z, Toosi P.	2016	26602028		benign	Variants (including SNPs and indels) imported from dbSNP
cardiovascular phenotype	DOID:1287	cardiovascular system disease	rs4641	dbSNP	1	156137743	156137743	A novel homozygous LMNA mutation (p.Met540Ile) causes mandibuloacral dysplasia type A.	Yassaee VR, Khojaste A, Hashemi-Gorji F, Ravesh Z, Toosi P.	2016	26602028		benign	Variants (including SNPs and indels) imported from dbSNP
atrial fibrillation	DOID:0060224	atrial fibrillation	rs12044963	dbSNP	1	111849738	111849738	A novel KCND3 mutation associated with early-onset lone atrial fibrillation.	Huang Y, Yang J, Xie W, Li Q, Zeng Z, Sui H, Shan Z, Huang Z.	2017	29383177	PMC5777789		Variants (including SNPs and indels) imported from dbSNP
atrial fibrillation familial 3	DOID:0050650	familial atrial fibrillation	rs199472708	dbSNP	11	2572015	2572015	A novel KCNQ1 missense mutation identified in a patient with juvenile-onset atrial fibrillation causes constitutively open IKs channels.	Hasegawa K, Ohno S, Ashihara T, Itoh H, Ding WG, Toyoda F, Makiyama T, Aoki H, Nakamura Y, Delisle BP, Matsuura H, Horie M.	2014	24096004		not provided,pathogenic	Variants (including SNPs and indels) imported from dbSNP
cardiovascular phenotype	DOID:1287	cardiovascular system disease	rs12720449	dbSNP	11	2588804	2588804	A novel KCNQ1 mutation in Chinese with congenital long QT syndrome	Liang L, Du ZD, Cai LL, Wu JX, Zheng T, Qi TX.	2003	14731347		uncertain significance,not provided,benign,likely benign	Variants (including SNPs and indels) imported from dbSNP
cardiovascular phenotype	DOID:1287	cardiovascular system disease	rs2230163	dbSNP	18	3173966	3173966	A Novel Locus for Ectodermal Dysplasia of Hair, Nail and Skin Pigmentation Anomalies Maps to Chromosome 18p11.32-p11.31.	Habib R, Ansar M, Mattheisen M, Shahid M, Ali G, Ahmad W, Betz RC.	2015	26115030	PMC4483272	benign	Variants (including SNPs and indels) imported from dbSNP
cardiovascular phenotype	DOID:1287	cardiovascular system disease	rs150264233	dbSNP	3	38550661	38550661	A novel LQT-3 mutation disrupts an inactivation gate complex with distinct rate-dependent phenotypic consequences.	Bankston JR, Sampson KJ, Kateriya S, Glaaser IW, Malito DL, Chung WK, Kass RS.	2007	18708744		uncertain significance,likely benign,pathogenic	Variants (including SNPs and indels) imported from dbSNP
atrial fibrillation	DOID:0060224	atrial fibrillation	rs242557	dbSNP	17	45942346	45942346	A novel MAPT mutation, G55R, in a frontotemporal dementia patient leads to altered Tau function.	Iyer A, Lapointe NE, Zielke K, Berdynski M, Guzman E, Barczak A, Chodakowska-?ebrowska M, Barcikowska M, Feinstein S, Zekanowski C.	2013	24086739	PMC3785453		Variants (including SNPs and indels) imported from dbSNP
atrial fibrillation	DOID:0060224	atrial fibrillation	rs242557	dbSNP	CHR_HSCHR17_1_CTG5	46155482	46155482	A novel MAPT mutation, G55R, in a frontotemporal dementia patient leads to altered Tau function.	Iyer A, Lapointe NE, Zielke K, Berdynski M, Guzman E, Barczak A, Chodakowska-?ebrowska M, Barcikowska M, Feinstein S, Zekanowski C.	2013	24086739	PMC3785453		Variants (including SNPs and indels) imported from dbSNP
atrial fibrillation	DOID:0060224	atrial fibrillation	rs242557	dbSNP	CHR_HSCHR17_2_CTG5	45953998	45953998	A novel MAPT mutation, G55R, in a frontotemporal dementia patient leads to altered Tau function.	Iyer A, Lapointe NE, Zielke K, Berdynski M, Guzman E, Barczak A, Chodakowska-?ebrowska M, Barcikowska M, Feinstein S, Zekanowski C.	2013	24086739	PMC3785453		Variants (including SNPs and indels) imported from dbSNP
cardiovascular phenotype	DOID:1287	cardiovascular system disease	rs72549410	dbSNP	3	38606058	38606058	A novel mechanism for LQT3 with 2:1 block: a pore-lining mutation in Nav1.5 significantly affects voltage-dependence of activation.	Horne AJ, Eldstrom J, Sanatani S, Fedida D.	2011	21193062		not provided,pathogenic	Variants (including SNPs and indels) imported from dbSNP
cardiovascular disease risk factors	DOID:1287	cardiovascular system disease	rs1800562	dbSNP	6	26092913	26092913	A novel MHC class I-like gene is mutated in patients with hereditary haemochromatosis.	Feder JN, Gnirke A, Thomas W, Tsuchihashi Z, Ruddy DA, Basava A, Dormishian F, Domingo R, Ellis MC, Fullan A, Hinton LM, Jones NL, Kimmel BE, Kronmal GS, Lauer P, Lee VK, Loeb DB, Mapa FA, McClelland E, Meyer NC, Mintier GA, Moeller N, Moore T, Morikang E	1996	8696333		uncertain significance,pathogenic,risk factor,association	Variants (including SNPs and indels) imported from dbSNP
cardiovascular phenotype	DOID:1287	cardiovascular system disease	rs767864243	dbSNP	20	46725349	46725349	A novel missense and a recurrent mutation in SLC2A10 gene of patients affected with arterial tortuosity syndrome.	Faiyaz-Ul-Haque M, Zaidi SH, Al-Sanna N, Alswaid A, Momenah T, Kaya N, Al-Dayel F, Bouhoaigah I, Saliem M, Tsui LC, Teebi AS.	2009	18774132		uncertain significance,likely pathogenic	Variants (including SNPs and indels) imported from dbSNP
familial hypertrophic cardiomyopathy 4	DOID:0080326	familial hypertrophic cardiomyopathy	rs2856655	dbSNP	11	47337534	47337534	A novel missense mutation in the myosin binding protein-C gene is responsible for hypertrophic cardiomyopathy with left ventricular dysfunction and dilation in elderly patients.	Konno T, Shimizu M, Ino H, Matsuyama T, Yamaguchi M, Terai H, Hayashi K, Mabuchi T, Kiyama M, Sakata K, Hayashi T, Inoue M, Kaneda T, Mabuchi H.	2003	12628722		uncertain significance,likely pathogenic,pathogenic	Variants (including SNPs and indels) imported from dbSNP
cardiomyopathy apical hypertrophic and neuropathy	DOID:0050700	cardiomyopathy	rs267606881	dbSNP	MT	8529	8529	A novel mitochondrial ATP8 gene mutation in a patient with apical hypertrophic cardiomyopathy and neuropathy.	Jonckheere AI, Hogeveen M, Nijtmans L, van den Brand M, Janssen A, Diepstra H, van den Brandt F, van den Heuvel B, Hol F, Hofste T, Kapusta L, Dillmann U, Shamdeen M, Smeitink J, Smeitink J, Rodenburg R.	2009	21686774	PMC3027703	pathogenic	Variants (including SNPs and indels) imported from dbSNP
cardiovascular phenotype	DOID:1287	cardiovascular system disease	rs397516539	dbSNP	1	237377365	237377365	A novel mutation (Arg169Gln) of the cardiac ryanodine receptor gene causing exercise-induced bidirectional ventricular tachycardia.	Hsueh CH, Weng YC, Chen CY, Lin TK, Lin YH, Lai LP, Lin JL.	2006	16517285		likely pathogenic,pathogenic	Variants (including SNPs and indels) imported from dbSNP
cardiac arrest	DOID:0060319	cardiac arrest	rs36210423	dbSNP	3	38603887	38603887	A novel mutation (T65P) in the PAS domain of the human potassium channel HERG results in the long QT syndrome by trafficking deficiency.	Paulussen A, Raes A, Matthijs G, Snyders DJ, Cohen N, Aerssens J.	2002	12354768		uncertain significance,not provided,benign,likely benign	Variants (including SNPs and indels) imported from dbSNP
cardiovascular phenotype	DOID:1287	cardiovascular system disease	rs36210423	dbSNP	3	38603887	38603887	A novel mutation (T65P) in the PAS domain of the human potassium channel HERG results in the long QT syndrome by trafficking deficiency.	Paulussen A, Raes A, Matthijs G, Snyders DJ, Cohen N, Aerssens J.	2002	12354768		uncertain significance,not provided,benign,likely benign	Variants (including SNPs and indels) imported from dbSNP
cardiovascular phenotype	DOID:1287	cardiovascular system disease	rs794728756	dbSNP	1	237640983	237640983	A novel mutation in FKBP12.6 binding region of the human cardiac ryanodine receptor gene (R2401H) in a Japanese patient with catecholaminergic polymorphic ventricular tachycardia.	Aizawa Y, Ueda K, Komura S, Washizuka T, Chinushi M, Inagaki N, Matsumoto Y, Hayashi T, Takahashi M, Nakano N, Yasunami M, Kimura A, Hiraoka M, Aizawa Y.	2005	15749201		likely pathogenic,pathogenic	Variants (including SNPs and indels) imported from dbSNP
atrial septal defect 2	DOID:1882	atrial heart septal defect	rs387906772	dbSNP	8	11755064	11755064	A novel mutation in GATA4 gene associated with dominant inherited familial atrial septal defect.	Chen Y, Han ZQ, Yan WD, Tang CZ, Xie JY, Chen H, Hu DY.	2010	20347099		pathogenic	Variants (including SNPs and indels) imported from dbSNP
atrial septal defect 2	DOID:1882	atrial heart septal defect	rs387906772	dbSNP	CHR_HG76_PATCH	8197749	8197749	A novel mutation in GATA4 gene associated with dominant inherited familial atrial septal defect.	Chen Y, Han ZQ, Yan WD, Tang CZ, Xie JY, Chen H, Hu DY.	2010	20347099		pathogenic	Variants (including SNPs and indels) imported from dbSNP
cardiovascular disease risk factors	DOID:1287	cardiovascular system disease	rs1803274	dbSNP	3	165773492	165773492	A novel mutation in the BCHE gene and phenotype identified in a child with low butyrylcholinesterase activity: a case report.	Yu R, Guo Y, Dan Y, Tan W, Mao Q, Deng G.	2018	29631548	PMC5891924	benign,likely benign	Variants (including SNPs and indels) imported from dbSNP
cardiomyopathy	DOID:0050700	cardiomyopathy	rs11570112	dbSNP	11	47333924	47333924	A novel mutation in the cardiac myosin-binding protein C gene is responsible for hypertrophic cardiomyopathy with severe ventricular hypertrophy and sudden death.	Konno T, Shimizu M, Ino H, Fujino N, Uchiyama K, Mabuchi T, Sakata K, Kaneda T, Fujita T, Masuta E, Mabuchi H.	2006	16181148		benign,likely benign,pathogenic	Variants (including SNPs and indels) imported from dbSNP
cardiovascular phenotype	DOID:1287	cardiovascular system disease	rs11570112	dbSNP	11	47333924	47333924	A novel mutation in the cardiac myosin-binding protein C gene is responsible for hypertrophic cardiomyopathy with severe ventricular hypertrophy and sudden death.	Konno T, Shimizu M, Ino H, Fujino N, Uchiyama K, Mabuchi T, Sakata K, Kaneda T, Fujita T, Masuta E, Mabuchi H.	2006	16181148		benign,likely benign,pathogenic	Variants (including SNPs and indels) imported from dbSNP
familial hypertrophic cardiomyopathy 4	DOID:0080326	familial hypertrophic cardiomyopathy	rs11570112	dbSNP	11	47333924	47333924	A novel mutation in the cardiac myosin-binding protein C gene is responsible for hypertrophic cardiomyopathy with severe ventricular hypertrophy and sudden death.	Konno T, Shimizu M, Ino H, Fujino N, Uchiyama K, Mabuchi T, Sakata K, Kaneda T, Fujita T, Masuta E, Mabuchi H.	2006	16181148		benign,likely benign,pathogenic	Variants (including SNPs and indels) imported from dbSNP
cardiovascular phenotype	DOID:1287	cardiovascular system disease	rs137854475	dbSNP	15	48487155	48487155	A novel mutation in the fibrillin gene (FBN1) in familial arachnodactyly.	Hayward C, Porteous ME, Brock DJ.	1994	7870075		uncertain significance,likely benign	Variants (including SNPs and indels) imported from dbSNP
cardiovascular phenotype	DOID:1287	cardiovascular system disease	rs397507549	dbSNP	12	112489104	112489104	A novel mutation in the PTPN11 gene in a patient with Noonan syndrome and rapidly progressive hypertrophic cardiomyopathy.	Takahashi K, Kogaki S, Kurotobi S, Nasuno S, Ohta M, Okabe H, Wada K, Sakai N, Taniike M, Ozono K.	2005	15889278		pathogenic	Variants (including SNPs and indels) imported from dbSNP
cardiovascular phenotype	DOID:1287	cardiovascular system disease	rs137854604	dbSNP	3	38551243	38551243	A novel mutation in the SCN5A gene is associated with Brugada syndrome.	Shin DJ, Kim E, Park SB, Jang WC, Bae Y, Han J, Jang Y, Joung B, Lee MH, Kim SS, Huang H, Chahine M, Yoon SK.	2007	17141278		not provided,likely pathogenic,pathogenic	Variants (including SNPs and indels) imported from dbSNP
cardiovascular phenotype	DOID:1287	cardiovascular system disease	rs45488304	dbSNP	3	38603750	38603750	A novel mutation L619F in the cardiac Na+ channel SCN5A associated with long-QT syndrome (LQT3): a role for the I-II linker in inactivation gating.	Wehrens XH, Rossenbacker T, Jongbloed RJ, Gewillig M, HeidbГјchel H, Doevendans PA, Vos MA, Wellens HJ, Kass RS.	2003	12673799		benign,likely benign	Variants (including SNPs and indels) imported from dbSNP
cardiovascular phenotype	DOID:1287	cardiovascular system disease	rs146664754	dbSNP	1	115732940	115732940	A Novel mutation of F189L in CASQ2 in families with catecholaminergic polymorphic ventricular tachycardia	Liu QQ, Oberti C, Zhang XQ, Ke T, Zhang T, Scheinman M, Hu DY, Wang QK.	2008	18543230		uncertain significance,likely benign	Variants (including SNPs and indels) imported from dbSNP
atrial septal defect 2	DOID:1882	atrial heart septal defect	rs387906771	dbSNP	8	11750166	11750166	A novel mutation of GATA4 in a familial atrial septal defect.	Chen Y, Mao J, Sun Y, Zhang Q, Cheng HB, Yan WH, Choy KW, Li H.	2010	20659440		pathogenic	Variants (including SNPs and indels) imported from dbSNP
atrial septal defect 2	DOID:1882	atrial heart septal defect	rs387906771	dbSNP	CHR_HG76_PATCH	8202648	8202648	A novel mutation of GATA4 in a familial atrial septal defect.	Chen Y, Mao J, Sun Y, Zhang Q, Cheng HB, Yan WH, Choy KW, Li H.	2010	20659440		pathogenic	Variants (including SNPs and indels) imported from dbSNP
cardiomyopathy	DOID:0050700	cardiomyopathy	rs186964570	dbSNP	14	23433656	23433656	A novel mutation of the beta myosin heavy chain gene responsible for familial hypertrophic cardiomyopathy.	Wang J, Xu SJ, Zhou H, Wang LJ, Hu B, Fang F, Zhang XM, Luo YW, He XY, Zhuang SW, Li XM, Liu ZM, Hu DY.	2009	19645038		uncertain significance,benign,likely benign	Variants (including SNPs and indels) imported from dbSNP
cardiovascular phenotype	DOID:1287	cardiovascular system disease	rs121913637	dbSNP	14	23425971	23425971	A novel mutation of the beta myosin heavy chain gene responsible for familial hypertrophic cardiomyopathy.	Wang J, Xu SJ, Zhou H, Wang LJ, Hu B, Fang F, Zhang XM, Luo YW, He XY, Zhuang SW, Li XM, Liu ZM, Hu DY.	2009	19645038		pathogenic	Variants (including SNPs and indels) imported from dbSNP
cardiovascular phenotype	DOID:1287	cardiovascular system disease	rs186964570	dbSNP	14	23433656	23433656	A novel mutation of the beta myosin heavy chain gene responsible for familial hypertrophic cardiomyopathy.	Wang J, Xu SJ, Zhou H, Wang LJ, Hu B, Fang F, Zhang XM, Luo YW, He XY, Zhuang SW, Li XM, Liu ZM, Hu DY.	2009	19645038		uncertain significance,benign,likely benign	Variants (including SNPs and indels) imported from dbSNP
familial hypertrophic cardiomyopathy 1	DOID:0080326	familial hypertrophic cardiomyopathy	rs121913637	dbSNP	14	23425971	23425971	A novel mutation of the beta myosin heavy chain gene responsible for familial hypertrophic cardiomyopathy.	Wang J, Xu SJ, Zhou H, Wang LJ, Hu B, Fang F, Zhang XM, Luo YW, He XY, Zhuang SW, Li XM, Liu ZM, Hu DY.	2009	19645038		pathogenic	Variants (including SNPs and indels) imported from dbSNP
familial hypertrophic cardiomyopathy 1	DOID:0080326	familial hypertrophic cardiomyopathy	rs186964570	dbSNP	14	23433656	23433656	A novel mutation of the beta myosin heavy chain gene responsible for familial hypertrophic cardiomyopathy.	Wang J, Xu SJ, Zhou H, Wang LJ, Hu B, Fang F, Zhang XM, Luo YW, He XY, Zhuang SW, Li XM, Liu ZM, Hu DY.	2009	19645038		uncertain significance,benign,likely benign	Variants (including SNPs and indels) imported from dbSNP
cardiovascular phenotype	DOID:1287	cardiovascular system disease	rs1800255	dbSNP	2	188999354	188999354	A novel mutation screening system for Ehlers-Danlos Syndrome, vascular type by high-resolution melting curve analysis in combination with small amplicon genotyping using genomic DNA.	Naing BT, Watanabe A, Shimada T.	2011	21219851		benign	Variants (including SNPs and indels) imported from dbSNP
cardiovascular phenotype	DOID:1287	cardiovascular system disease	rs1801184	dbSNP	2	188999856	188999856	A novel mutation screening system for Ehlers-Danlos Syndrome, vascular type by high-resolution melting curve analysis in combination with small amplicon genotyping using genomic DNA.	Naing BT, Watanabe A, Shimada T.	2011	21219851		benign	Variants (including SNPs and indels) imported from dbSNP
cardiovascular phenotype	DOID:1287	cardiovascular system disease	rs2271683	dbSNP	2	189009011	189009011	A novel mutation screening system for Ehlers-Danlos Syndrome, vascular type by high-resolution melting curve analysis in combination with small amplicon genotyping using genomic DNA.	Naing BT, Watanabe A, Shimada T.	2011	21219851		benign	Variants (including SNPs and indels) imported from dbSNP
cardiovascular phenotype	DOID:1287	cardiovascular system disease	rs1805124	dbSNP	3	38603929	38603929	A novel nonsense mutation in the SCN5A gene leads to Brugada syndrome and a silent gene mutation carrier state.	Keller DI, Barrane FZ, Gouas L, Martin J, Pilote S, Suarez V, Osswald S, Brink M, Guicheney P, Schwick N, Chahine M.	2005	16239976		benign,likely benign,pathogenic	Variants (including SNPs and indels) imported from dbSNP
cardiovascular disease risk factors	DOID:1287	cardiovascular system disease	rs2075650	dbSNP	19	44892362	44892362	A Novel SCCA Approach via Truncated ?1-norm and Truncated Group Lasso for Brain Imaging Genetics.	Du L, Liu K, Zhang T, Yao X, Yan J, Risacher SL, Han J, Guo L, Saykin AJ, Shen L, AlzheimerвЂ™s Disease Neuroimaging Initiative.	2017	28968815	PMC5860211		Variants (including SNPs and indels) imported from dbSNP
atrial fibrillation	DOID:0060224	atrial fibrillation	rs199473324	dbSNP	3	38550748	38550748	A novel SCN5A gain-of-function mutation M1875T associated with familial atrial fibrillation.	Makiyama T, Akao M, Shizuta S, Doi T, Nishiyama K, Oka Y, Ohno S, Nishio Y, Tsuji K, Itoh H, Kimura T, Kita T, Horie M.	2008	18929244		not provided,likely pathogenic	Variants (including SNPs and indels) imported from dbSNP
cardiovascular phenotype	DOID:1287	cardiovascular system disease	rs137854604	dbSNP	3	38551243	38551243	A novel SCN5A mutation associated with idiopathic ventricular fibrillation without typical ECG findings of Brugada syndrome.	Akai J, Makita N, Sakurada H, Shirai N, Ueda K, Kitabatake A, Nakazawa K, Kimura A, Hiraoka M.	2000	10940383		not provided,likely pathogenic,pathogenic	Variants (including SNPs and indels) imported from dbSNP
cardiovascular phenotype	DOID:1287	cardiovascular system disease	rs199473311	dbSNP	3	38551070	38551070	A novel SCN5A mutation associated with long QT-3: altered inactivation kinetics and channel dysfunction.	Rivolta I, Clancy CE, Tateyama M, Liu H, Priori SG, Kass RS.	2002	12209021		not provided,pathogenic	Variants (including SNPs and indels) imported from dbSNP
cardiovascular phenotype	DOID:1287	cardiovascular system disease	rs199473605	dbSNP	3	38560374	38560374	A novel SCN5A mutation V1340I in Brugada syndrome augmenting arrhythmias during febrile illness.	Samani K, Wu G, Ai T, Shuraih M, Mathuria NS, Li Z, Sohma Y, Purevjav E, Xi Y, Towbin JA, Cheng J, Vatta M.	2009	19648062	PMC2753513	uncertain significance	Variants (including SNPs and indels) imported from dbSNP
cardiovascular phenotype	DOID:1287	cardiovascular system disease	rs2301558	dbSNP	22	19764306	19764306	A novel TBX1 missense mutation in patients with syndromic congenital heart defects.	Jaouadi A, Tabebi M, Abdelhedi F, Abid D, Kamoun F, Chabchoub I, Maatoug S, Doukali H, Belghuith N, Ksentini MA, Keskes LA, Triki C, Hachicha M, Kamoun S, Kamoun H.	2018	29596833		benign	Variants (including SNPs and indels) imported from dbSNP
cardiovascular phenotype	DOID:1287	cardiovascular system disease	rs41298814	dbSNP	22	19763250	19763250	A novel TBX1 missense mutation in patients with syndromic congenital heart defects.	Jaouadi A, Tabebi M, Abdelhedi F, Abid D, Kamoun F, Chabchoub I, Maatoug S, Doukali H, Belghuith N, Ksentini MA, Keskes LA, Triki C, Hachicha M, Kamoun S, Kamoun H.	2018	29596833		benign	Variants (including SNPs and indels) imported from dbSNP
cardiomyopathy	DOID:0050700	cardiomyopathy	rs28933979	dbSNP	18	31592974	31592974	A novel transthyretin mutation at position 30 (Leu for Val) associated with familial amyloidotic polyneuropathy.	Murakami T, Atsumi T, Maeda S, Tanase S, Ishikawa K, Mita S, Kumamoto T, Araki S, Ando M.	1992	1520326		pathogenic	Variants (including SNPs and indels) imported from dbSNP
cardiomyopathy	DOID:0050700	cardiomyopathy	rs61688134	dbSNP	12	21864476	21864476	A novel Val734Ile variant in the ABCC9 gene associated with myocardial infarction.	Minoretti P, Falcone C, Aldeghi A, Olivieri V, Mori F, Emanuele E, Calcagnino M, Geroldi D.	2006	16563363		benign,likely benign	Variants (including SNPs and indels) imported from dbSNP
cardiovascular phenotype	DOID:1287	cardiovascular system disease	rs61688134	dbSNP	12	21864476	21864476	A novel Val734Ile variant in the ABCC9 gene associated with myocardial infarction.	Minoretti P, Falcone C, Aldeghi A, Olivieri V, Mori F, Emanuele E, Calcagnino M, Geroldi D.	2006	16563363		benign,likely benign	Variants (including SNPs and indels) imported from dbSNP
cardiovascular phenotype	DOID:1287	cardiovascular system disease	rs28933981	dbSNP	18	31598647	31598647	A novel variant of transthyretin (prealbumin), Thr119 to Met, associated with increased thyroxine binding.	Scrimshaw BJ, Fellowes AP, Palmer BN, Croxson MS, Stockigt JR, George PM.	1992	1356051		benign,likely benign,risk factor	Variants (including SNPs and indels) imported from dbSNP
heart failure	DOID:114	heart disease	rs11136000	dbSNP	8	27607002	27607002	A one-degree-of-freedom test for supra-multiplicativity of SNP effects.	Herold C, Ramirez A, Drichel D, Lacour A, Vaitsiakhovich T, NГ¶then MM, Jessen F, Maier W, Becker T.	2013	24205078	PMC3813579		Variants (including SNPs and indels) imported from dbSNP
familial hypertrophic cardiomyopathy 1	DOID:0080326	familial hypertrophic cardiomyopathy	rs36211715	dbSNP	14	23424839	23424839	A p.R870H mutation in the beta-cardiac myosin heavy chain 7 gene causes familial hypertrophic cardiomyopathy in several members of an Indian family.	Bashyam MD, Savithri GR, Gopikrishna M, Narasimhan C.	2007	17703256	PMC2651383	uncertain significance,pathogenic	Variants (including SNPs and indels) imported from dbSNP
cardio-facio-cutaneous syndrome	DOID:0060233	cardiofaciocutaneous syndrome	rs113488022	dbSNP	7	140753336	140753336	A patient with BRAF V600E lung adenocarcinoma responding to vemurafenib.	Gautschi O, Pauli C, Strobel K, Hirschmann A, Printzen G, Aebi S, Diebold J.	2012	22743296		likely pathogenic,pathogenic	Variants (including SNPs and indels) imported from dbSNP
cardiovascular phenotype	DOID:1287	cardiovascular system disease	rs121913552	dbSNP	1	11965542	11965542	A patient with Ehlers-Danlos syndrome type VI is homozygous for a premature termination codon in exon 14 of the lysyl hydroxylase 1 gene.	Walker LC, Marini JC, Grange DK, Filie J, Yeowell HN.	1999	10329027		pathogenic	Variants (including SNPs and indels) imported from dbSNP
cardiovascular disease	DOID:1287	cardiovascular system disease	rs11591147	dbSNP	1	55039974	55039974	A PCSK9 missense variant associated with a reduced risk of early-onset myocardial infarction.	Kathiresan S, Myocardial Infarction Genetics Consortium.	2008	18499582		benign,pathogenic,association	Variants (including SNPs and indels) imported from dbSNP
cardiovascular disease risk factors	DOID:1287	cardiovascular system disease	rs6511720	dbSNP	19	11091630	11091630	A perspective for sequencing familial hypercholesterolaemia in African Americans.	Wright ML, Housman D, Taylor JY.	2016	29263812	PMC5685298	benign	Variants (including SNPs and indels) imported from dbSNP
cardiomyopathy	DOID:0050700	cardiomyopathy	rs104894845	dbSNP	X	101401752	101401752	A pharmacogenetic approach to identify mutant forms of ?-galactosidase A that respond to a pharmacological chaperone for Fabry disease.	Wu X, Katz E, Della Valle MC, Mascioli K, Flanagan JJ, Castelli JP, Schiffmann R, Boudes P, Lockhart DJ, Valenzano KJ, Benjamin ER.	2011	21598360	PMC3170878	uncertain significance,likely pathogenic,pathogenic	Variants (including SNPs and indels) imported from dbSNP
cardiomyopathy	DOID:0050700	cardiomyopathy	rs397515870	dbSNP	X	101400692	101400692	A pharmacogenetic approach to identify mutant forms of ?-galactosidase A that respond to a pharmacological chaperone for Fabry disease.	Wu X, Katz E, Della Valle MC, Mascioli K, Flanagan JJ, Castelli JP, Schiffmann R, Boudes P, Lockhart DJ, Valenzano KJ, Benjamin ER.	2011	21598360	PMC3170878	likely pathogenic,pathogenic	Variants (including SNPs and indels) imported from dbSNP
cardiovascular phenotype	DOID:1287	cardiovascular system disease	rs28935197	dbSNP	X	101398942	101398942	A pharmacogenetic approach to identify mutant forms of ?-galactosidase A that respond to a pharmacological chaperone for Fabry disease.	Wu X, Katz E, Della Valle MC, Mascioli K, Flanagan JJ, Castelli JP, Schiffmann R, Boudes P, Lockhart DJ, Valenzano KJ, Benjamin ER.	2011	21598360	PMC3170878	pathogenic	Variants (including SNPs and indels) imported from dbSNP
cardiovascular phenotype	DOID:1287	cardiovascular system disease	rs104894845	dbSNP	X	101401752	101401752	A pharmacogenetic approach to identify mutant forms of ?-galactosidase A that respond to a pharmacological chaperone for Fabry disease.	Wu X, Katz E, Della Valle MC, Mascioli K, Flanagan JJ, Castelli JP, Schiffmann R, Boudes P, Lockhart DJ, Valenzano KJ, Benjamin ER.	2011	21598360	PMC3170878	uncertain significance,likely pathogenic,pathogenic	Variants (including SNPs and indels) imported from dbSNP
cardiovascular disease	DOID:1287	cardiovascular system disease	rs11591147	dbSNP	1	55039974	55039974	A phenome-wide association study to discover pleiotropic effects of PCSK9, APOB, and LDLR.	Safarova MS, Satterfield BA, Fan X, Austin EE, Ye Z, Bastarache L, Zheng N, Ritchie MD, Borthwick KM, Williams MS, Larson EB, Scrol A, Jarvik GP, Crosslin DR, Leppig K, Rasmussen-Torvik LJ, Pendergrass SA, Sturm AC, Namjou B, Shah AS, Carroll RJ, Chung WK	2019	30774981	PMC6370860	benign,pathogenic,association	Variants (including SNPs and indels) imported from dbSNP
cardiovascular disease	DOID:1287	cardiovascular system disease	rs1367117	dbSNP	2	21041028	21041028	A phenome-wide association study to discover pleiotropic effects of PCSK9, APOB, and LDLR.	Safarova MS, Satterfield BA, Fan X, Austin EE, Ye Z, Bastarache L, Zheng N, Ritchie MD, Borthwick KM, Williams MS, Larson EB, Scrol A, Jarvik GP, Crosslin DR, Leppig K, Rasmussen-Torvik LJ, Pendergrass SA, Sturm AC, Namjou B, Shah AS, Carroll RJ, Chung WK	2019	30774981	PMC6370860	benign,likely benign	Variants (including SNPs and indels) imported from dbSNP
cardiovascular disease risk factors	DOID:1287	cardiovascular system disease	rs6511720	dbSNP	19	11091630	11091630	A phenome-wide association study to discover pleiotropic effects of PCSK9, APOB, and LDLR.	Safarova MS, Satterfield BA, Fan X, Austin EE, Ye Z, Bastarache L, Zheng N, Ritchie MD, Borthwick KM, Williams MS, Larson EB, Scrol A, Jarvik GP, Crosslin DR, Leppig K, Rasmussen-Torvik LJ, Pendergrass SA, Sturm AC, Namjou B, Shah AS, Carroll RJ, Chung WK	2019	30774981	PMC6370860	benign	Variants (including SNPs and indels) imported from dbSNP
cardiovascular disease	DOID:1287	cardiovascular system disease	rs12740374	dbSNP	1	109274968	109274968	A phenomics-based strategy identifies loci on APOC1, BRAP, and PLCG1 associated with metabolic syndrome phenotype domains.	Avery CL, He Q, North KE, Ambite JL, Boerwinkle E, Fornage M, Hindorff LA, Kooperberg C, Meigs JB, Pankow JS, Pendergrass SA, Psaty BM, Ritchie MD, Rotter JI, Taylor KD, Wilkens LR, Heiss G, Lin DY.	2011	22022282	PMC3192835	association	Variants (including SNPs and indels) imported from dbSNP
cardiovascular disease	DOID:1287	cardiovascular system disease	rs964184	dbSNP	11	116778201	116778201	A phenomics-based strategy identifies loci on APOC1, BRAP, and PLCG1 associated with metabolic syndrome phenotype domains.	Avery CL, He Q, North KE, Ambite JL, Boerwinkle E, Fornage M, Hindorff LA, Kooperberg C, Meigs JB, Pankow JS, Pendergrass SA, Psaty BM, Ritchie MD, Rotter JI, Taylor KD, Wilkens LR, Heiss G, Lin DY.	2011	22022282	PMC3192835		Variants (including SNPs and indels) imported from dbSNP
cardiovascular disease risk factors	DOID:1287	cardiovascular system disease	rs6511720	dbSNP	19	11091630	11091630	A phenomics-based strategy identifies loci on APOC1, BRAP, and PLCG1 associated with metabolic syndrome phenotype domains.	Avery CL, He Q, North KE, Ambite JL, Boerwinkle E, Fornage M, Hindorff LA, Kooperberg C, Meigs JB, Pankow JS, Pendergrass SA, Psaty BM, Ritchie MD, Rotter JI, Taylor KD, Wilkens LR, Heiss G, Lin DY.	2011	22022282	PMC3192835	benign	Variants (including SNPs and indels) imported from dbSNP
cardiovascular disease risk factors	DOID:1287	cardiovascular system disease	rs1260326	dbSNP	2	27508073	27508073	A phenomics-based strategy identifies loci on APOC1, BRAP, and PLCG1 associated with metabolic syndrome phenotype domains.	Avery CL, He Q, North KE, Ambite JL, Boerwinkle E, Fornage M, Hindorff LA, Kooperberg C, Meigs JB, Pankow JS, Pendergrass SA, Psaty BM, Ritchie MD, Rotter JI, Taylor KD, Wilkens LR, Heiss G, Lin DY.	2011	22022282	PMC3192835	association	Variants (including SNPs and indels) imported from dbSNP
cardiovascular risk factors	DOID:1287	cardiovascular system disease	rs247616	dbSNP	16	56955678	56955678	A phenomics-based strategy identifies loci on APOC1, BRAP, and PLCG1 associated with metabolic syndrome phenotype domains.	Avery CL, He Q, North KE, Ambite JL, Boerwinkle E, Fornage M, Hindorff LA, Kooperberg C, Meigs JB, Pankow JS, Pendergrass SA, Psaty BM, Ritchie MD, Rotter JI, Taylor KD, Wilkens LR, Heiss G, Lin DY.	2011	22022282	PMC3192835		Variants (including SNPs and indels) imported from dbSNP
cardiovascular disease	DOID:1287	cardiovascular system disease	rs12740374	dbSNP	1	109274968	109274968	A PheWAS study of a large observational epidemiological cohort of African Americans from the REGARDS study.	Zhao X, Geng X, Srinivasasainagendra V, Chaudhary N, Judd S, Wadley V, GutiГ©rrez OM, Wang H, Lange EM, Lange LA, Woo D, Unverzagt FW, Safford M, Cushman M, Limdi N, Quarells R, Arnett DK, Irvin MR, Zhi D.	2019	30704471	PMC6357353	association	Variants (including SNPs and indels) imported from dbSNP
cardiovascular disease	DOID:1287	cardiovascular system disease	rs7412	dbSNP	19	44908822	44908822	A PheWAS study of a large observational epidemiological cohort of African Americans from the REGARDS study.	Zhao X, Geng X, Srinivasasainagendra V, Chaudhary N, Judd S, Wadley V, GutiГ©rrez OM, Wang H, Lange EM, Lange LA, Woo D, Unverzagt FW, Safford M, Cushman M, Limdi N, Quarells R, Arnett DK, Irvin MR, Zhi D.	2019	30704471	PMC6357353	pathogenic,drug response,other	Variants (including SNPs and indels) imported from dbSNP
cardiovascular disease risk factors	DOID:1287	cardiovascular system disease	rs173539	dbSNP	16	56954132	56954132	A PheWAS study of a large observational epidemiological cohort of African Americans from the REGARDS study.	Zhao X, Geng X, Srinivasasainagendra V, Chaudhary N, Judd S, Wadley V, GutiГ©rrez OM, Wang H, Lange EM, Lange LA, Woo D, Unverzagt FW, Safford M, Cushman M, Limdi N, Quarells R, Arnett DK, Irvin MR, Zhi D.	2019	30704471	PMC6357353		Variants (including SNPs and indels) imported from dbSNP
cardiovascular disease risk factors	DOID:1287	cardiovascular system disease	rs6511720	dbSNP	19	11091630	11091630	A PheWAS study of a large observational epidemiological cohort of African Americans from the REGARDS study.	Zhao X, Geng X, Srinivasasainagendra V, Chaudhary N, Judd S, Wadley V, GutiГ©rrez OM, Wang H, Lange EM, Lange LA, Woo D, Unverzagt FW, Safford M, Cushman M, Limdi N, Quarells R, Arnett DK, Irvin MR, Zhi D.	2019	30704471	PMC6357353	benign	Variants (including SNPs and indels) imported from dbSNP
cardiovascular risk factors	DOID:1287	cardiovascular system disease	rs247616	dbSNP	16	56955678	56955678	A PheWAS study of a large observational epidemiological cohort of African Americans from the REGARDS study.	Zhao X, Geng X, Srinivasasainagendra V, Chaudhary N, Judd S, Wadley V, GutiГ©rrez OM, Wang H, Lange EM, Lange LA, Woo D, Unverzagt FW, Safford M, Cushman M, Limdi N, Quarells R, Arnett DK, Irvin MR, Zhi D.	2019	30704471	PMC6357353		Variants (including SNPs and indels) imported from dbSNP
cardiovascular risk factors	DOID:1287	cardiovascular system disease	rs7412	dbSNP	19	44908822	44908822	A PheWAS study of a large observational epidemiological cohort of African Americans from the REGARDS study.	Zhao X, Geng X, Srinivasasainagendra V, Chaudhary N, Judd S, Wadley V, GutiГ©rrez OM, Wang H, Lange EM, Lange LA, Woo D, Unverzagt FW, Safford M, Cushman M, Limdi N, Quarells R, Arnett DK, Irvin MR, Zhi D.	2019	30704471	PMC6357353	pathogenic,drug response,other	Variants (including SNPs and indels) imported from dbSNP
heart failure	DOID:114	heart disease	rs373655	dbSNP	14	89528919	89528919	A pilot genome wide association and gene expression array study of suicide with and without major depression.	Galfalvy H, Zalsman G, Huang YY, Murphy L, Rosoklija G, Dwork AJ, Haghighi F, Arango V, Mann JJ.	2013	22059935	PMC3493880		Variants (including SNPs and indels) imported from dbSNP
cardiovascular disease	DOID:1287	cardiovascular system disease	rs7412	dbSNP	19	44908822	44908822	A pilot study of gene/gene and gene/environment interactions in Alzheimer disease.	Ghebranious N, Mukesh B, Giampietro PF, Glurich I, Mickel SF, Waring SC, McCarty CA.	2011	20682755	PMC3064752	pathogenic,drug response,other	Variants (including SNPs and indels) imported from dbSNP
cardiovascular risk factors	DOID:1287	cardiovascular system disease	rs7412	dbSNP	19	44908822	44908822	A pilot study of gene/gene and gene/environment interactions in Alzheimer disease.	Ghebranious N, Mukesh B, Giampietro PF, Glurich I, Mickel SF, Waring SC, McCarty CA.	2011	20682755	PMC3064752	pathogenic,drug response,other	Variants (including SNPs and indels) imported from dbSNP
cardiovascular disease	DOID:1287	cardiovascular system disease	rs1801253	dbSNP	10	114045297	114045297	A pilot study of the pharmacodynamic impact of SSRI drug selection and beta-1 receptor genotype (ADRB1) on cardiac vital signs in depressed patients: a novel pharmacogenetic approach.	Thomas KL, Ellingrod VL, Bishop JR, Keiser MJ.	2010	20581797	PMC3807824	drug response	Variants (including SNPs and indels) imported from dbSNP
cardiomyopathy	DOID:0050700	cardiomyopathy	rs104894729	dbSNP	19	55151892	55151892	A point mutation (R192H) in the C-terminus of human cardiac troponin I causes diastolic dysfunction in transgenic mice.	Du J, Zhang C, Liu J, Sidky C, Huang XP.	2006	17027633		likely pathogenic,pathogenic	Variants (including SNPs and indels) imported from dbSNP
cardiovascular phenotype	DOID:1287	cardiovascular system disease	rs104894729	dbSNP	19	55151892	55151892	A point mutation (R192H) in the C-terminus of human cardiac troponin I causes diastolic dysfunction in transgenic mice.	Du J, Zhang C, Liu J, Sidky C, Huang XP.	2006	17027633		likely pathogenic,pathogenic	Variants (including SNPs and indels) imported from dbSNP
cardiovascular phenotype	DOID:1287	cardiovascular system disease	rs267607159	dbSNP	18	31598616	31598616	A point mutation in transthyretin increases affinity for thyroxine and produces euthyroid hyperthyroxinemia.	Moses AC, Rosen HN, Moller DE, Tsuzaki S, Haddow JE, Lawlor J, Liepnieks JJ, Nichols WC, Benson MD.	1990	1979335	PMC329840	uncertain significance	Variants (including SNPs and indels) imported from dbSNP
cardiovascular disease	DOID:1287	cardiovascular system disease	rs964184	dbSNP	11	116778201	116778201	A polygenic basis for four classical Fredrickson hyperlipoproteinemia phenotypes that are characterized by hypertriglyceridemia.	Hegele RA, Ban MR, Hsueh N, Kennedy BA, Cao H, Zou GY, Anand S, Yusuf S, Huff MW, Wang J.	2009	19656773	PMC2758142		Variants (including SNPs and indels) imported from dbSNP
cardiovascular disease risk factors	DOID:1287	cardiovascular system disease	rs6511720	dbSNP	19	11091630	11091630	A polygenic basis for four classical Fredrickson hyperlipoproteinemia phenotypes that are characterized by hypertriglyceridemia.	Hegele RA, Ban MR, Hsueh N, Kennedy BA, Cao H, Zou GY, Anand S, Yusuf S, Huff MW, Wang J.	2009	19656773	PMC2758142	benign	Variants (including SNPs and indels) imported from dbSNP
cardiovascular disease risk factors	DOID:1287	cardiovascular system disease	rs1260326	dbSNP	2	27508073	27508073	A polygenic basis for four classical Fredrickson hyperlipoproteinemia phenotypes that are characterized by hypertriglyceridemia.	Hegele RA, Ban MR, Hsueh N, Kennedy BA, Cao H, Zou GY, Anand S, Yusuf S, Huff MW, Wang J.	2009	19656773	PMC2758142	association	Variants (including SNPs and indels) imported from dbSNP
cardiovascular disease	DOID:1287	cardiovascular system disease	rs7412	dbSNP	19	44908822	44908822	A Polygenic Risk Score Derived From Episodic Memory Weighted Genetic Variants Is Associated With Cognitive Decline in Preclinical Alzheimer's Disease.	Porter T, Burnham SC, Savage G, Lim YY, Maruff P, Milicic L, Peretti M, Ames D, Masters CL, Martins RN, Rainey-Smith S, Rowe CC, Salvado O, Taddei K, Groth D, Verdile G, Villemagne VL, Laws SM.	2018	30620773	PMC6305908	pathogenic,drug response,other	Variants (including SNPs and indels) imported from dbSNP
cardiovascular risk factors	DOID:1287	cardiovascular system disease	rs7412	dbSNP	19	44908822	44908822	A Polygenic Risk Score Derived From Episodic Memory Weighted Genetic Variants Is Associated With Cognitive Decline in Preclinical Alzheimer's Disease.	Porter T, Burnham SC, Savage G, Lim YY, Maruff P, Milicic L, Peretti M, Ames D, Masters CL, Martins RN, Rainey-Smith S, Rowe CC, Salvado O, Taddei K, Groth D, Verdile G, Villemagne VL, Laws SM.	2018	30620773	PMC6305908	pathogenic,drug response,other	Variants (including SNPs and indels) imported from dbSNP
cardiovascular disease	DOID:1287	cardiovascular system disease	rs7412	dbSNP	19	44908822	44908822	A polymorphism of apolipoprotein E (APOE) gene is associated with age at natural menopause in Caucasian females.	He LN, Recker RR, Deng HW, Dvornyk V.	2009	19058936	PMC2734973	pathogenic,drug response,other	Variants (including SNPs and indels) imported from dbSNP
cardiovascular risk factors	DOID:1287	cardiovascular system disease	rs7412	dbSNP	19	44908822	44908822	A polymorphism of apolipoprotein E (APOE) gene is associated with age at natural menopause in Caucasian females.	He LN, Recker RR, Deng HW, Dvornyk V.	2009	19058936	PMC2734973	pathogenic,drug response,other	Variants (including SNPs and indels) imported from dbSNP
cardiovascular disease	DOID:1287	cardiovascular system disease	rs1801253	dbSNP	10	114045297	114045297	A polymorphism within a conserved beta(1)-adrenergic receptor motif alters cardiac function and beta-blocker response in human heart failure.	Liggett SB, Mialet-Perez J, Thaneemit-Chen S, Weber SA, Greene SM, Hodne D, Nelson B, Morrison J, Domanski MJ, Wagoner LE, Abraham WT, Anderson JL, Carlquist JF, Krause-Steinrauf HJ, Lazzeroni LC, Port JD, Lavori PW, Bristow MR.	2006	16844790	PMC1523317	drug response	Variants (including SNPs and indels) imported from dbSNP
cardiovascular disease	DOID:1287	cardiovascular system disease	rs943580	dbSNP	1	230701298	230701298	A population association study of angiotensinogen polymorphisms and haplotypes with left ventricular phenotypes.	Rasmussen-Torvik LJ, North KE, Gu CC, Lewis CE, Wilk JB, Chakravarti A, Chang YP, Miller MB, Li N, Devereux RB, Arnett DK.	2005	16286570			Variants (including SNPs and indels) imported from dbSNP
cardiovascular disease	DOID:1287	cardiovascular system disease	rs11191580	dbSNP	10	103146454	103146454	A population-based study of genetic variation and psychotic experiences in adolescents.	Zammit S, Hamshere M, Dwyer S, Georgiva L, Timpson N, Moskvina V, Richards A, Evans DM, Lewis G, Jones P, Owen MJ, O'Donovan MC.	2014	24174267	PMC4193688		Variants (including SNPs and indels) imported from dbSNP
cardiomyopathy	DOID:0050700	cardiomyopathy	rs28933979	dbSNP	18	31592974	31592974	A possible role for miRNA silencing in disease phenotype variation in Swedish transthyretin V30M carriers.	Olsson M, Norgren N, Obayashi K, Plante-Bordeneuve V, Suhr OB, Cederquist K, Jonasson J.	2010	20840742	PMC2945965	pathogenic	Variants (including SNPs and indels) imported from dbSNP
cardiomyopathy	DOID:0050700	cardiomyopathy	rs36204272	dbSNP	18	31598550	31598550	A possible role for miRNA silencing in disease phenotype variation in Swedish transthyretin V30M carriers.	Olsson M, Norgren N, Obayashi K, Plante-Bordeneuve V, Suhr OB, Cederquist K, Jonasson J.	2010	20840742	PMC2945965	benign	Variants (including SNPs and indels) imported from dbSNP
cardiovascular phenotype	DOID:1287	cardiovascular system disease	rs1800458	dbSNP	18	31592902	31592902	A possible role for miRNA silencing in disease phenotype variation in Swedish transthyretin V30M carriers.	Olsson M, Norgren N, Obayashi K, Plante-Bordeneuve V, Suhr OB, Cederquist K, Jonasson J.	2010	20840742	PMC2945965	benign	Variants (including SNPs and indels) imported from dbSNP
heart failure	DOID:114	heart disease	rs11136000	dbSNP	8	27607002	27607002	A potential endophenotype for Alzheimer's disease: cerebrospinal fluid clusterin.	Deming Y, Xia J, Cai Y, Lord J, Holmans P, Bertelsen S, Holtzman D, Morris JC, Bales K, Pickering EH, Kauwe J, Goate A, Cruchaga C, Alzheimer's Disease Neuroimaging Initiative (ADNI).	2016	26545630	PMC5118651		Variants (including SNPs and indels) imported from dbSNP
cardiovascular phenotype	DOID:1287	cardiovascular system disease	rs104894363	dbSNP	12	110919160	110919160	A Potential Oligogenic Etiology of Hypertrophic Cardiomyopathy: A Classic Single-Gene Disorder.	Li L, Bainbridge MN, Tan Y, Willerson JT, Marian AJ.	2017	28223422	PMC5380229	uncertain significance,benign,likely benign,likely pathogenic	Variants (including SNPs and indels) imported from dbSNP
familial hypertrophic cardiomyopathy 1	DOID:0080326	familial hypertrophic cardiomyopathy	rs104894363	dbSNP	12	110919160	110919160	A Potential Oligogenic Etiology of Hypertrophic Cardiomyopathy: A Classic Single-Gene Disorder.	Li L, Bainbridge MN, Tan Y, Willerson JT, Marian AJ.	2017	28223422	PMC5380229	uncertain significance,benign,likely benign,likely pathogenic	Variants (including SNPs and indels) imported from dbSNP
familial hypertrophic cardiomyopathy 10	DOID:0080326	familial hypertrophic cardiomyopathy	rs104894363	dbSNP	12	110919160	110919160	A Potential Oligogenic Etiology of Hypertrophic Cardiomyopathy: A Classic Single-Gene Disorder.	Li L, Bainbridge MN, Tan Y, Willerson JT, Marian AJ.	2017	28223422	PMC5380229	uncertain significance,benign,likely benign,likely pathogenic	Variants (including SNPs and indels) imported from dbSNP
heart failure	DOID:114	heart disease	rs2571445	dbSNP	2	217818431	217818431	A predictive model for the development of chronic obstructive pulmonary disease.	Guo YI, Qian Y, Gong YI, Pan C, Shi G, Wan H.	2015	26623030	PMC4660625		Variants (including SNPs and indels) imported from dbSNP
cardiovascular disease	DOID:1287	cardiovascular system disease	rs4865796	dbSNP	5	53976834	53976834	A principal component meta-analysis on multiple anthropometric traits identifies novel loci for body shape.	Ried JS, Jeff M J, Chu AY, Bragg-Gresham JL, van Dongen J, Huffman JE, Ahluwalia TS, Cadby G, Eklund N, Eriksson J, Esko T, Feitosa MF, Goel A, Gorski M, Hayward C, Heard-Costa NL, Jackson AU, Jokinen E, Kanoni S, Kristiansson K, Kutalik Z, Lahti J, Luan	2016	27876822	PMC5114527		Variants (including SNPs and indels) imported from dbSNP
cardiovascular disease	DOID:1287	cardiovascular system disease	rs12740374	dbSNP	1	109274968	109274968	A promoter interaction map for cardiovascular disease genetics.	Montefiori LE, Sobreira DR, Sakabe NJ, Aneas I, Joslin AC, Hansen GT, Bozek G, Moskowitz IP, McNally EM, NГіbrega MA.	2018	29988018	PMC6053306	association	Variants (including SNPs and indels) imported from dbSNP
cardiomyopathy	DOID:0050700	cardiomyopathy	rs76992529	dbSNP	18	31598655	31598655	A prospective evaluation of the transthyretin Ile122 allele frequency in an African-American population.	Yamashita T, Hamidi Asl K, Yazaki M, Benson MD.	2005	16011990		pathogenic	Variants (including SNPs and indels) imported from dbSNP
cardiovascular phenotype	DOID:1287	cardiovascular system disease	rs76992529	dbSNP	18	31598655	31598655	A prospective evaluation of the transthyretin Ile122 allele frequency in an African-American population.	Yamashita T, Hamidi Asl K, Yazaki M, Benson MD.	2005	16011990		pathogenic	Variants (including SNPs and indels) imported from dbSNP
heart failure	DOID:114	heart disease	rs11136000	dbSNP	8	27607002	27607002	A putative Alzheimer's disease risk allele in PCK1 influences brain atrophy in multiple sclerosis.	Xia Z, Chibnik LB, Glanz BI, Liguori M, Shulman JM, Tran D, Khoury SJ, Chitnis T, Holyoak T, Weiner HL, Guttmann CR, De Jager PL.	2010	21152065	PMC2994939		Variants (including SNPs and indels) imported from dbSNP
cardiomyopathy	DOID:0050700	cardiomyopathy	rs142000963	dbSNP	1	156138719	156138719	A R644C mutation within lamin A extends the mutations causing dilated cardiomyopathy.	Genschel J, Bochow B, Kuepferling S, Ewert R, Hetzer R, Lochs H, Schmidt H.	2001	11180602		uncertain significance,not provided,likely benign,likely pathogenic	Variants (including SNPs and indels) imported from dbSNP
cardiovascular phenotype	DOID:1287	cardiovascular system disease	rs142000963	dbSNP	1	156138719	156138719	A R644C mutation within lamin A extends the mutations causing dilated cardiomyopathy.	Genschel J, Bochow B, Kuepferling S, Ewert R, Hetzer R, Lochs H, Schmidt H.	2001	11180602		uncertain significance,not provided,likely benign,likely pathogenic	Variants (including SNPs and indels) imported from dbSNP
cardiovascular disease	DOID:1287	cardiovascular system disease	rs7412	dbSNP	19	44908822	44908822	A rapid and cost-effective method for genotyping apolipoprotein E gene polymorphism.	Zhong L, Xie YZ, Cao TT, Wang Z, Wang T, Li X, Shen RC, Xu H, Bu G, Chen XF.	2016	26754117	PMC4710020	pathogenic,drug response,other	Variants (including SNPs and indels) imported from dbSNP
cardiovascular risk factors	DOID:1287	cardiovascular system disease	rs7412	dbSNP	19	44908822	44908822	A rapid and cost-effective method for genotyping apolipoprotein E gene polymorphism.	Zhong L, Xie YZ, Cao TT, Wang Z, Wang T, Li X, Shen RC, Xu H, Bu G, Chen XF.	2016	26754117	PMC4710020	pathogenic,drug response,other	Variants (including SNPs and indels) imported from dbSNP
cardiovascular disease	DOID:1287	cardiovascular system disease	rs964184	dbSNP	11	116778201	116778201	A rare functional cardioprotective APOC3 variant has risen in frequency in distinct population isolates.	Tachmazidou I, Dedoussis G, Southam L, Farmaki AE, Ritchie GR, Xifara DK, Matchan A, Hatzikotoulas K, Rayner NW, Chen Y, Pollin TI, O'Connell JR, Yerges-Armstrong LM, Kiagiadaki C, Panoutsopoulou K, Schwartzentruber J, Moutsianas L, UK10K consortium, Tsaf	2013	24343240	PMC3905724		Variants (including SNPs and indels) imported from dbSNP
cardiovascular phenotype	DOID:1287	cardiovascular system disease	rs1063242	dbSNP	7	92085597	92085597	A rare mutation in UNC5C predisposes to late-onset Alzheimer's disease and increases neuronal cell death.	Wetzel-Smith MK, Hunkapiller J, Bhangale TR, Srinivasan K, Maloney JA, Atwal JK, Sa SM, Yaylaoglu MB, Foreman O, Ortmann W, Rathore N, Hansen DV, Tessier-Lavigne M, Alzheimer's Disease Genetics Consortium, Mayeux R, Pericak-Vance M, Haines J, Farrer LA, S	2014	25419706	PMC4301587	benign,likely benign	Variants (including SNPs and indels) imported from dbSNP
cardiovascular disease risk factors	DOID:1287	cardiovascular system disease	rs1260326	dbSNP	2	27508073	27508073	A Rare Nonsense Mutation in the Glucokinase Regulator Gene Is Associated With a Rapidly Progressive Clinical Form of Nonalcoholic Steatohepatitis.	Pirola CJ, Flichman D, Dopazo H, FernГЎndez Gianotti T, San Martino J, Rohr C, Garaycoechea M, Gazzi C, CastaГ±o GO, Sookoian S.	2018	30202818	PMC6128235	association	Variants (including SNPs and indels) imported from dbSNP
cardiovascular disease	DOID:1287	cardiovascular system disease	rs964184	dbSNP	11	116778201	116778201	A rare variant in APOC3 is associated with plasma triglyceride and VLDL levels in Europeans.	Timpson NJ, Walter K, Min JL, Tachmazidou I, Malerba G, Shin SY, Chen L, Futema M, Southam L, Iotchkova V, Cocca M, Huang J, Memari Y, McCarthy S, Danecek P, Muddyman D, Mangino M, Menni C, Perry JR, Ring SM, Gaye A, Dedoussis G, Farmaki AE, Burton P, Tal	2014	25225788	PMC4167609		Variants (including SNPs and indels) imported from dbSNP
atrial septal defect	DOID:1882	atrial heart septal defect	rs365990	dbSNP	14	23392602	23392602	A rare variant in MYH6 is associated with high risk of sick sinus syndrome.	Holm H, Gudbjartsson DF, Sulem P, Masson G, Helgadottir HT, Zanon C, Magnusson OT, Helgason A, Saemundsdottir J, Gylfason A, Stefansdottir H, Gretarsdottir S, Matthiasson SE, Thorgeirsson GM, Jonasdottir A, Sigurdsson A, Stefansson H, Werge T, Rafnar T, K	2011	21378987	PMC3066272	benign,likely benign	Variants (including SNPs and indels) imported from dbSNP
cardiomyopathy	DOID:0050700	cardiomyopathy	rs28730774	dbSNP	14	23397231	23397231	A rare variant in MYH6 is associated with high risk of sick sinus syndrome.	Holm H, Gudbjartsson DF, Sulem P, Masson G, Helgadottir HT, Zanon C, Magnusson OT, Helgason A, Saemundsdottir J, Gylfason A, Stefansdottir H, Gretarsdottir S, Matthiasson SE, Thorgeirsson GM, Jonasdottir A, Sigurdsson A, Stefansson H, Werge T, Rafnar T, K	2011	21378987	PMC3066272	benign,likely benign	Variants (including SNPs and indels) imported from dbSNP
cardiovascular phenotype	DOID:1287	cardiovascular system disease	rs365990	dbSNP	14	23392602	23392602	A rare variant in MYH6 is associated with high risk of sick sinus syndrome.	Holm H, Gudbjartsson DF, Sulem P, Masson G, Helgadottir HT, Zanon C, Magnusson OT, Helgason A, Saemundsdottir J, Gylfason A, Stefansdottir H, Gretarsdottir S, Matthiasson SE, Thorgeirsson GM, Jonasdottir A, Sigurdsson A, Stefansson H, Werge T, Rafnar T, K	2011	21378987	PMC3066272	benign,likely benign	Variants (including SNPs and indels) imported from dbSNP
cardiovascular phenotype	DOID:1287	cardiovascular system disease	rs28730774	dbSNP	14	23397231	23397231	A rare variant in MYH6 is associated with high risk of sick sinus syndrome.	Holm H, Gudbjartsson DF, Sulem P, Masson G, Helgadottir HT, Zanon C, Magnusson OT, Helgason A, Saemundsdottir J, Gylfason A, Stefansdottir H, Gretarsdottir S, Matthiasson SE, Thorgeirsson GM, Jonasdottir A, Sigurdsson A, Stefansson H, Werge T, Rafnar T, K	2011	21378987	PMC3066272	benign,likely benign	Variants (including SNPs and indels) imported from dbSNP
familial hypertrophic cardiomyopathy 14	DOID:0080326	familial hypertrophic cardiomyopathy	rs28730774	dbSNP	14	23397231	23397231	A rare variant in MYH6 is associated with high risk of sick sinus syndrome.	Holm H, Gudbjartsson DF, Sulem P, Masson G, Helgadottir HT, Zanon C, Magnusson OT, Helgason A, Saemundsdottir J, Gylfason A, Stefansdottir H, Gretarsdottir S, Matthiasson SE, Thorgeirsson GM, Jonasdottir A, Sigurdsson A, Stefansson H, Werge T, Rafnar T, K	2011	21378987	PMC3066272	benign,likely benign	Variants (including SNPs and indels) imported from dbSNP
heart rate	DOID:10273	heart conduction disease	rs365990	dbSNP	14	23392602	23392602	A rare variant in MYH6 is associated with high risk of sick sinus syndrome.	Holm H, Gudbjartsson DF, Sulem P, Masson G, Helgadottir HT, Zanon C, Magnusson OT, Helgason A, Saemundsdottir J, Gylfason A, Stefansdottir H, Gretarsdottir S, Matthiasson SE, Thorgeirsson GM, Jonasdottir A, Sigurdsson A, Stefansson H, Werge T, Rafnar T, K	2011	21378987	PMC3066272	benign,likely benign	Variants (including SNPs and indels) imported from dbSNP
heart rate	DOID:10273	heart conduction disease	rs2215456	dbSNP	12	41916107	41916107	A recessive gene for primary vesicoureteral reflux maps to chromosome 12p11-q13.	Weng PL, Sanna-Cherchi S, Hensle T, Shapiro E, Werzberger A, Caridi G, Izzi C, Konka A, Reese AC, Cheng R, Werzberger S, Schlussel RN, Burk RD, Lee JH, Ravazzolo R, Scolari F, Ghiggeri GM, Glassberg K, Gharavi AG.	2009	19443636	PMC2709685		Variants (including SNPs and indels) imported from dbSNP
cardiovascular phenotype	DOID:1287	cardiovascular system disease	rs397516943	dbSNP	6	7559281	7559281	A recessive mutation in desmoplakin causes arrhythmogenic right ventricular dysplasia, skin disorder, and woolly hair.	Alcalai R, Metzger S, Rosenheck S, Meiner V, Chajek-Shaul T.	2003	12875771		likely pathogenic,pathogenic	Variants (including SNPs and indels) imported from dbSNP
cardiovascular phenotype	DOID:1287	cardiovascular system disease	rs120074187	dbSNP	11	2572963	2572963	A recessive variant of the Romano-Ward long-QT syndrome?	Priori SG, Schwartz PJ, Napolitano C, Bianchi L, Dennis A, De Fusco M, Brown AM, Casari G.	1998	9641694		uncertain significance,likely pathogenic	Variants (including SNPs and indels) imported from dbSNP
atrial fibrillation	DOID:0060224	atrial fibrillation	rs762624	dbSNP	6	36677811	36677811	A regulatory SNP at position -899 in CDKN1A is associated with systemic lupus erythematosus and lupus nephritis.	Kim K, Sung YK, Kang CP, Choi CB, Kang C, Bae SC.	2009	19262578			Variants (including SNPs and indels) imported from dbSNP
atrial fibrillation	DOID:0060224	atrial fibrillation	rs2200733	dbSNP	4	110789013	110789013	A replication study of genetic risk loci for ischemic stroke in a Dutch population: a case-control study.	Hauer AJ, Pulit SL, van den Berg LH, de Bakker PIW, Veldink JH, Ruigrok YM, Dutch Parelsnoer Institute-Cerebrovascular accident (CVA) Study Group.	2017	28939865	PMC5610184		Variants (including SNPs and indels) imported from dbSNP
atrial fibrillation/atrial flutter	DOID:0050650	familial atrial fibrillation	rs2200733	dbSNP	4	110789013	110789013	A replication study of genetic risk loci for ischemic stroke in a Dutch population: a case-control study.	Hauer AJ, Pulit SL, van den Berg LH, de Bakker PIW, Veldink JH, Ruigrok YM, Dutch Parelsnoer Institute-Cerebrovascular accident (CVA) Study Group.	2017	28939865	PMC5610184		Variants (including SNPs and indels) imported from dbSNP
cardiovascular disease	DOID:1287	cardiovascular system disease	rs964184	dbSNP	11	116778201	116778201	A replication study of GWAS-derived lipid genes in Asian Indians: the chromosomal region 11q23.3 harbors loci contributing to triglycerides.	Braun TR, Been LF, Singhal A, Worsham J, Ralhan S, Wander GS, Chambers JC, Kooner JS, Aston CE, Sanghera DK.	2012	22623978	PMC3356398		Variants (including SNPs and indels) imported from dbSNP
cardiovascular phenotype	DOID:1287	cardiovascular system disease	rs1805127	dbSNP	21	34449523	34449523	A replication study on proposed candidate genes in MГ©niГЁre's disease, and a review of the current status of genetic studies.	Hietikko E, KotimГ¤ki J, Okuloff A, Sorri M, MГ¤nnikkГ¶ M.	2012	22934933		not provided,benign	Variants (including SNPs and indels) imported from dbSNP
cardiovascular disease risk factors	DOID:1287	cardiovascular system disease	rs2075650	dbSNP	19	44892362	44892362	A review of the biomedical innovations for healthy longevity.	Moskalev A, Anisimov V, Aliper A, Artemov A, Asadullah K, Belsky D, Baranova A, de Grey A, Dixit VD, Debonneuil E, Dobrovolskaya E, Fedichev P, Fedintsev A, Fraifeld V, Franceschi C, Freer R, FГјlГ¶p T, Feige J, Gems D, Gladyshev V, Gorbunova V, Irincheeva	2017	NA	PMC5310653		Variants (including SNPs and indels) imported from dbSNP
cardiovascular phenotype	DOID:1287	cardiovascular system disease	rs5742905	dbSNP	21	43063074	43063074	A revisit to the natural history of homocystinuria due to cystathionine beta-synthase deficiency.	Skovby F, Gaustadnes M, Mudd SH.	2010	19819175	PMC2795104	pathogenic	Variants (including SNPs and indels) imported from dbSNP
cardiovascular disease	DOID:1287	cardiovascular system disease	rs7412	dbSNP	19	44908822	44908822	A Robust and Powerful Set-Valued Approach to Rare Variant Association Analyses of Secondary Traits in Case-Control Sequencing Studies.	Kang G, Bi W, Zhang H, Pounds S, Cheng C, Shete S, Zou F, Zhao Y, Zhang JF, Yue W.	2017	28040743	PMC5340322	pathogenic,drug response,other	Variants (including SNPs and indels) imported from dbSNP
cardiovascular risk factors	DOID:1287	cardiovascular system disease	rs7412	dbSNP	19	44908822	44908822	A Robust and Powerful Set-Valued Approach to Rare Variant Association Analyses of Secondary Traits in Case-Control Sequencing Studies.	Kang G, Bi W, Zhang H, Pounds S, Cheng C, Shete S, Zou F, Zhao Y, Zhang JF, Yue W.	2017	28040743	PMC5340322	pathogenic,drug response,other	Variants (including SNPs and indels) imported from dbSNP
cardiovascular disease	DOID:1287	cardiovascular system disease	rs696	dbSNP	14	35401887	35401887	A Role for Heterozygosity of NF-????B1 rs28362491 Polymorphism in Patients with Idiopathic Oligospermia.	Tek B, ElГ§in P, TunГ§demir M, Onaran ?, Г–zkara H, Kan?gГјr Sultuybek G.	2016	27041523		benign	Variants (including SNPs and indels) imported from dbSNP
atrial fibrillation	DOID:0060224	atrial fibrillation	rs1044258	dbSNP	10	101845957	101845957	A scan of chromosome 10 identifies a novel locus showing strong association with late-onset Alzheimer disease.	Grupe A, Li Y, Rowland C, Nowotny P, Hinrichs AL, Smemo S, Kauwe JS, Maxwell TJ, Cherny S, Doil L, Tacey K, van Luchene R, Myers A, Wavrant-De VriГЁze F, Kaleem M, Hollingworth P, Jehu L, Foy C, Archer N, Hamilton G, Holmans P, Morris CM, Catanese J, Snins	2006	16385451	PMC1380225		Variants (including SNPs and indels) imported from dbSNP
cardiovascular disease	DOID:1287	cardiovascular system disease	rs4948550	dbSNP	10	58828793	58828793	A scan of chromosome 10 identifies a novel locus showing strong association with late-onset Alzheimer disease.	Grupe A, Li Y, Rowland C, Nowotny P, Hinrichs AL, Smemo S, Kauwe JS, Maxwell TJ, Cherny S, Doil L, Tacey K, van Luchene R, Myers A, Wavrant-De VriГЁze F, Kaleem M, Hollingworth P, Jehu L, Foy C, Archer N, Hamilton G, Holmans P, Morris CM, Catanese J, Snins	2006	16385451	PMC1380225		Variants (including SNPs and indels) imported from dbSNP
cardiovascular phenotype	DOID:1287	cardiovascular system disease	rs942077	dbSNP	10	110835961	110835961	A scan of chromosome 10 identifies a novel locus showing strong association with late-onset Alzheimer disease.	Grupe A, Li Y, Rowland C, Nowotny P, Hinrichs AL, Smemo S, Kauwe JS, Maxwell TJ, Cherny S, Doil L, Tacey K, van Luchene R, Myers A, Wavrant-De VriГЁze F, Kaleem M, Hollingworth P, Jehu L, Foy C, Archer N, Hamilton G, Holmans P, Morris CM, Catanese J, Snins	2006	16385451	PMC1380225	benign,likely benign	Variants (including SNPs and indels) imported from dbSNP
cardiovascular phenotype	DOID:1287	cardiovascular system disease	rs2234962	dbSNP	10	119670121	119670121	A scan of chromosome 10 identifies a novel locus showing strong association with late-onset Alzheimer disease.	Grupe A, Li Y, Rowland C, Nowotny P, Hinrichs AL, Smemo S, Kauwe JS, Maxwell TJ, Cherny S, Doil L, Tacey K, van Luchene R, Myers A, Wavrant-De VriГЁze F, Kaleem M, Hollingworth P, Jehu L, Foy C, Archer N, Hamilton G, Holmans P, Morris CM, Catanese J, Snins	2006	16385451	PMC1380225	benign	Variants (including SNPs and indels) imported from dbSNP
cardiovascular phenotype	DOID:1287	cardiovascular system disease	rs3858340	dbSNP	10	119676774	119676774	A scan of chromosome 10 identifies a novel locus showing strong association with late-onset Alzheimer disease.	Grupe A, Li Y, Rowland C, Nowotny P, Hinrichs AL, Smemo S, Kauwe JS, Maxwell TJ, Cherny S, Doil L, Tacey K, van Luchene R, Myers A, Wavrant-De VriГЁze F, Kaleem M, Hollingworth P, Jehu L, Foy C, Archer N, Hamilton G, Holmans P, Morris CM, Catanese J, Snins	2006	16385451	PMC1380225	benign	Variants (including SNPs and indels) imported from dbSNP
cardiovascular phenotype	DOID:1287	cardiovascular system disease	rs4025981	dbSNP	10	20850460	20850460	A scan of chromosome 10 identifies a novel locus showing strong association with late-onset Alzheimer disease.	Grupe A, Li Y, Rowland C, Nowotny P, Hinrichs AL, Smemo S, Kauwe JS, Maxwell TJ, Cherny S, Doil L, Tacey K, van Luchene R, Myers A, Wavrant-De VriГЁze F, Kaleem M, Hollingworth P, Jehu L, Foy C, Archer N, Hamilton G, Holmans P, Morris CM, Catanese J, Snins	2006	16385451	PMC1380225	benign	Variants (including SNPs and indels) imported from dbSNP
cardiovascular phenotype	DOID:1287	cardiovascular system disease	rs7916821	dbSNP	10	68174212	68174212	A scan of chromosome 10 identifies a novel locus showing strong association with late-onset Alzheimer disease.	Grupe A, Li Y, Rowland C, Nowotny P, Hinrichs AL, Smemo S, Kauwe JS, Maxwell TJ, Cherny S, Doil L, Tacey K, van Luchene R, Myers A, Wavrant-De VriГЁze F, Kaleem M, Hollingworth P, Jehu L, Foy C, Archer N, Hamilton G, Holmans P, Morris CM, Catanese J, Snins	2006	16385451	PMC1380225	not provided,benign	Variants (including SNPs and indels) imported from dbSNP
heart rate response to recovery post exercise	DOID:10273	heart conduction disease	rs6795970	dbSNP	3	38725184	38725184	A SCN10A SNP biases human pain sensitivity.	Duan G, Han C, Wang Q, Guo S, Zhang Y, Ying Y, Huang P, Zhang L, Macala L, Shah P, Zhang M, Li N, Dib-Hajj SD, Waxman SG, Zhang X.	2016	27590072	PMC5011395	benign	Variants (including SNPs and indels) imported from dbSNP
cardiomyopathy	DOID:0050700	cardiomyopathy	rs397515870	dbSNP	X	101400692	101400692	A sensitive mutation screening strategy for Fabry disease: detection of nine mutations in the alpha-galactosidase A gene.	Blanch LC, Meaney C, Morris CP.	1996	8807334		likely pathogenic,pathogenic	Variants (including SNPs and indels) imported from dbSNP
cardiovascular disease	DOID:1287	cardiovascular system disease	rs12740374	dbSNP	1	109274968	109274968	A sequence variant associated with sortilin-1 (SORT1) on 1p13.3 is independently associated with abdominal aortic aneurysm.	Jones GT, Bown MJ, Gretarsdottir S, Romaine SP, Helgadottir A, Yu G, Tromp G, Norman PE, Jin C, Baas AF, Blankensteijn JD, Kullo IJ, Phillips LV, Williams MJ, Topless R, Merriman TR, Vasudevan TM, Lewis DR, Blair RD, Hill AA, Sayers RD, Powell JT, Delouka	2013	23535823	PMC3690970	association	Variants (including SNPs and indels) imported from dbSNP
atrial fibrillation	DOID:0060224	atrial fibrillation	rs7193343	dbSNP	16	72995261	72995261	A sequence variant in ZFHX3 on 16q22 associates with atrial fibrillation and ischemic stroke.	Gudbjartsson DF, Holm H, Gretarsdottir S, Thorleifsson G, Walters GB, Thorgeirsson G, Gulcher J, Mathiesen EB, NjГёlstad I, Nyrnes A, Wilsgaard T, Hald EM, Hveem K, Stoltenberg C, Kucera G, Stubblefield T, Carter S, Roden D, Ng MC, Baum L, So WY, Wong KS,	2009	19597491	PMC2740741		Variants (including SNPs and indels) imported from dbSNP
cardiovascular phenotype	DOID:1287	cardiovascular system disease	rs199472730	dbSNP	11	2572895	2572895	A sex difference in the interaction between promethazine and morphine in the mouse.	Shater HA, Pleuvry BJ.	1977	21241		not provided,likely pathogenic,pathogenic	Variants (including SNPs and indels) imported from dbSNP
cardiovascular disease	DOID:1287	cardiovascular system disease	rs7412	dbSNP	19	44908822	44908822	A simple and efficient algorithm for genome-wide homozygosity analysis in disease.	Liu W, Ding J, Gibbs JR, Wang SJ, Hardy J, Singleton A.	2009	19756043	PMC2758715	pathogenic,drug response,other	Variants (including SNPs and indels) imported from dbSNP
cardiovascular risk factors	DOID:1287	cardiovascular system disease	rs7412	dbSNP	19	44908822	44908822	A simple and efficient algorithm for genome-wide homozygosity analysis in disease.	Liu W, Ding J, Gibbs JR, Wang SJ, Hardy J, Singleton A.	2009	19756043	PMC2758715	pathogenic,drug response,other	Variants (including SNPs and indels) imported from dbSNP
cardiovascular disease risk factors	DOID:1287	cardiovascular system disease	rs1800562	dbSNP	6	26092913	26092913	A simple genetic test identifies 90% of UK patients with haemochromatosis. The UK Haemochromatosis Consortium.		1997	9462220	PMC1891611	uncertain significance,pathogenic,risk factor,association	Variants (including SNPs and indels) imported from dbSNP
cardiovascular phenotype	DOID:1287	cardiovascular system disease	rs45620037	dbSNP	3	38613787	38613787	A simulation study for the effect of acid concentration and temperture on sick sinus syndrome	Li X, Zhang J, Cheng R, Jiang Y, Gao F.	2013	24059039		uncertain significance,benign,likely benign,pathogenic	Variants (including SNPs and indels) imported from dbSNP
cardiovascular disease	DOID:1287	cardiovascular system disease	rs6271	dbSNP	9	133657152	133657152	A single nucleotide polymorphism at DBH, possibly associated with attention-deficit/hyperactivity disorder, associates with lower plasma dopamine beta-hydroxylase activity and is in linkage disequilibrium with two putative functional single nucleotide pol	Tang Y, Buxbaum SG, Waldman I, Anderson GM, Zabetian CP, KГ¶hnke MD, Cubells JF.	2006	16616730		likely benign	Variants (including SNPs and indels) imported from dbSNP
cardiovascular disease	DOID:1287	cardiovascular system disease	rs964184	dbSNP	11	116778201	116778201	A single nucleotide polymorphism in APOA5 determines triglyceride levels in Hong Kong and Guangzhou Chinese.	Jiang CQ, Liu B, Cheung BM, Lam TH, Lin JM, Li Jin Y, Yue XJ, Ong KL, Tam S, Wong KS, Tomlinson B, Lam KS, Thomas GN.	2010	20571505	PMC2987477		Variants (including SNPs and indels) imported from dbSNP
cardiovascular disease	DOID:1287	cardiovascular system disease	rs6271	dbSNP	9	133657152	133657152	A single nucleotide polymorphism in dopamine beta hydroxylase (rs6271(C>T)) is over-represented in inflammatory bowel disease patients and reduces circulating enzyme.	Gonzalez-Lopez E, Kawasawa-Imamura Y, Zhang L, Huang X, Koltun WA, Coates MD, Vrana KE.	2019	30817802	PMC6394932	likely benign	Variants (including SNPs and indels) imported from dbSNP
cardiovascular phenotype	DOID:1287	cardiovascular system disease	rs1057128	dbSNP	11	2776007	2776007	A single nucleotide polymorphism in KCNQ1 is associated with susceptibility to diabetic nephropathy in japanese subjects with type 2 diabetes.	Ohshige T, Tanaka Y, Araki S, Babazono T, Toyoda M, Umezono T, Watada H, Suzuki D, Iwamoto Y, Kawamori R, Nakamura Y, Maeda S.	2010	20056949	PMC2845039	benign	Variants (including SNPs and indels) imported from dbSNP
cardiovascular phenotype	DOID:1287	cardiovascular system disease	rs1057128	dbSNP	CHR_HSCHR11_1_CTG7	2776007	2776007	A single nucleotide polymorphism in KCNQ1 is associated with susceptibility to diabetic nephropathy in japanese subjects with type 2 diabetes.	Ohshige T, Tanaka Y, Araki S, Babazono T, Toyoda M, Umezono T, Watada H, Suzuki D, Iwamoto Y, Kawamori R, Nakamura Y, Maeda S.	2010	20056949	PMC2845039	benign	Variants (including SNPs and indels) imported from dbSNP
cardio-facio-cutaneous syndrome	DOID:0060233	cardiofaciocutaneous syndrome	rs61764370	dbSNP	12	25207290	25207290	A single nucleotide polymorphism in the 3'-untranslated region of the KRAS gene disrupts the interaction with let-7a and enhances the metastatic potential of osteosarcoma cells.	Zhang S, Hou C, Li G, Zhong Y, Zhang J, Guo X, Li B, Bi Z, Shao M.	2016	27430246		likely benign	Variants (including SNPs and indels) imported from dbSNP
cardiovascular disease	DOID:1287	cardiovascular system disease	rs1229984	dbSNP	4	99318162	99318162	A single nucleotide polymorphism in the alcohol dehydrogenase 7 gene (alanine to glycine substitution at amino acid 92) is associated with the risk of squamous cell carcinoma of the head and neck.	Wei S, Liu Z, Zhao H, Niu J, Wang LE, El-Naggar AK, Sturgis EM, Wei Q.	2010	20336794	PMC2891145	protective	Variants (including SNPs and indels) imported from dbSNP
cardio-facio-cutaneous syndrome	DOID:0060233	cardiofaciocutaneous syndrome	rs61764370	dbSNP	12	25207290	25207290	A Single Nucleotide Polymorphism in the RASGRF2 Gene Is Associated with Alcoholic Liver Cirrhosis in Men.	Novo-Veleiro I, Cieza-Borrella C, Pastor I, Chamorro AJ, Laso FJ, GonzГЎlez-Sarmiento R, Marcos M.	2016	27992614	PMC5167392	likely benign	Variants (including SNPs and indels) imported from dbSNP
cardiovascular phenotype	DOID:1287	cardiovascular system disease	rs199473411	dbSNP	11	2585275	2585275	A single strand conformation polymorphism/heteroduplex (SSCP/HD) method for detection of mutations in 15 exons of the KVLQT1 gene, associated with long QT syndrome.	Larsen LA, Andersen PS, Kanters JK, Jacobsen JR, Vuust J, Christiansen M.	1999	10090529		not provided,likely pathogenic,pathogenic	Variants (including SNPs and indels) imported from dbSNP
cardiovascular disease	DOID:1287	cardiovascular system disease	rs9818870	dbSNP	3	138403280	138403280	A Single-Nucleotide Polymorphism in C12orf43 Region is Associated with the Risk of Coronary Artery Disease in a Pakistani Cohort.	Shahzadi S, Shabana, Chaudhry M, Arooj I, Hasnain S.	2016	27263109			Variants (including SNPs and indels) imported from dbSNP
cardio-facio-cutaneous syndrome	DOID:0060233	cardiofaciocutaneous syndrome	rs712	dbSNP	12	25209618	25209618	A single-nucleotide polymorphism in the 3'-UTR region of the adipocyte fatty acid binding protein 4 gene is associated with prognosis of triple-negative breast cancer.	Wang W, Yuan P, Yu D, Du F, Zhu A, Li Q, Zhang P, Lin D, Xu B.	2016	26959740	PMC4951346	likely benign	Variants (including SNPs and indels) imported from dbSNP
cardio-facio-cutaneous syndrome	DOID:0060233	cardiofaciocutaneous syndrome	rs9266	dbSNP	12	25209283	25209283	A single-nucleotide polymorphism in the 3'-UTR region of the adipocyte fatty acid binding protein 4 gene is associated with prognosis of triple-negative breast cancer.	Wang W, Yuan P, Yu D, Du F, Zhu A, Li Q, Zhang P, Lin D, Xu B.	2016	26959740	PMC4951346	likely benign	Variants (including SNPs and indels) imported from dbSNP
cardio-facio-cutaneous syndrome	DOID:0060233	cardiofaciocutaneous syndrome	rs12587	dbSNP	12	25205894	25205894	A single-nucleotide polymorphism in the 3'-UTR region of the adipocyte fatty acid binding protein 4 gene is associated with prognosis of triple-negative breast cancer.	Wang W, Yuan P, Yu D, Du F, Zhu A, Li Q, Zhang P, Lin D, Xu B.	2016	26959740	PMC4951346	likely benign	Variants (including SNPs and indels) imported from dbSNP
cardio-facio-cutaneous syndrome	DOID:0060233	cardiofaciocutaneous syndrome	rs13096	dbSNP	12	25206907	25206907	A single-nucleotide polymorphism in the 3'-UTR region of the adipocyte fatty acid binding protein 4 gene is associated with prognosis of triple-negative breast cancer.	Wang W, Yuan P, Yu D, Du F, Zhu A, Li Q, Zhang P, Lin D, Xu B.	2016	26959740	PMC4951346	likely benign	Variants (including SNPs and indels) imported from dbSNP
cardio-facio-cutaneous syndrome	DOID:0060233	cardiofaciocutaneous syndrome	rs1137282	dbSNP	12	25209843	25209843	A single-nucleotide polymorphism in the 3'-UTR region of the adipocyte fatty acid binding protein 4 gene is associated with prognosis of triple-negative breast cancer.	Wang W, Yuan P, Yu D, Du F, Zhu A, Li Q, Zhang P, Lin D, Xu B.	2016	26959740	PMC4951346	benign,likely benign	Variants (including SNPs and indels) imported from dbSNP
cardio-facio-cutaneous syndrome	DOID:0060233	cardiofaciocutaneous syndrome	rs7960917	dbSNP	12	25208712	25208712	A single-nucleotide polymorphism in the 3'-UTR region of the adipocyte fatty acid binding protein 4 gene is associated with prognosis of triple-negative breast cancer.	Wang W, Yuan P, Yu D, Du F, Zhu A, Li Q, Zhang P, Lin D, Xu B.	2016	26959740	PMC4951346	likely benign	Variants (including SNPs and indels) imported from dbSNP
cardio-facio-cutaneous syndrome	DOID:0060233	cardiofaciocutaneous syndrome	rs7973450	dbSNP	12	25208208	25208208	A single-nucleotide polymorphism in the 3'-UTR region of the adipocyte fatty acid binding protein 4 gene is associated with prognosis of triple-negative breast cancer.	Wang W, Yuan P, Yu D, Du F, Zhu A, Li Q, Zhang P, Lin D, Xu B.	2016	26959740	PMC4951346	likely benign	Variants (including SNPs and indels) imported from dbSNP
cardiovascular phenotype	DOID:1287	cardiovascular system disease	rs1805124	dbSNP	3	38603929	38603929	A SNaPshot assay for detection of 45 mutations in the SCN5A gene in the Chinese Han Population.	Wang J, Wang X, Ma Z, Yun K, Liu J, Chen D, Liu Z, Shi J, Li Z, Gao C, Du Q, Zhang G.	2018	29877586		benign,likely benign,pathogenic	Variants (including SNPs and indels) imported from dbSNP
cardio-facio-cutaneous syndrome	DOID:0060233	cardiofaciocutaneous syndrome	rs712	dbSNP	12	25209618	25209618	A SNP in a let-7 microRNA complementary site in the KRAS 3' untranslated region increases non-small cell lung cancer risk.	Chin LJ, Ratner E, Leng S, Zhai R, Nallur S, Babar I, Muller RU, Straka E, Su L, Burki EA, Crowell RE, Patel R, Kulkarni T, Homer R, Zelterman D, Kidd KK, Zhu Y, Christiani DC, Belinsky SA, Slack FJ, Weidhaas JB.	2008	18922928	PMC2672193	likely benign	Variants (including SNPs and indels) imported from dbSNP
cardio-facio-cutaneous syndrome	DOID:0060233	cardiofaciocutaneous syndrome	rs61764370	dbSNP	12	25207290	25207290	A SNP in a let-7 microRNA complementary site in the KRAS 3' untranslated region increases non-small cell lung cancer risk.	Chin LJ, Ratner E, Leng S, Zhai R, Nallur S, Babar I, Muller RU, Straka E, Su L, Burki EA, Crowell RE, Patel R, Kulkarni T, Homer R, Zelterman D, Kidd KK, Zhu Y, Christiani DC, Belinsky SA, Slack FJ, Weidhaas JB.	2008	18922928	PMC2672193	likely benign	Variants (including SNPs and indels) imported from dbSNP
cardiac conduction defect nonprogressive	DOID:10273	heart conduction disease	rs137854606	dbSNP	3	38604062	38604062	A sodium-channel mutation causes isolated cardiac conduction disease.	Tan HL, Bink-Boelkens MT, Bezzina CR, Viswanathan PC, Beaufort-Krol GC, van Tintelen PJ, van den Berg MP, Wilde AA, Balser JR.	2001	11234013		not provided,pathogenic	Variants (including SNPs and indels) imported from dbSNP
cardiac conduction defect nonspecific	DOID:10273	heart conduction disease	rs137854606	dbSNP	3	38604062	38604062	A sodium-channel mutation causes isolated cardiac conduction disease.	Tan HL, Bink-Boelkens MT, Bezzina CR, Viswanathan PC, Beaufort-Krol GC, van Tintelen PJ, van den Berg MP, Wilde AA, Balser JR.	2001	11234013		not provided,pathogenic	Variants (including SNPs and indels) imported from dbSNP
cardiomyopathy	DOID:0050700	cardiomyopathy	rs76992529	dbSNP	18	31598655	31598655	A specific test for transthyretin 122 (Val----Ile), based on PCR-primer-introduced restriction analysis (PCR-PIRA): confirmation of the gene frequency in blacks.	Jacobson DR.	1992	1729888	PMC1682535	pathogenic	Variants (including SNPs and indels) imported from dbSNP
cardiovascular phenotype	DOID:1287	cardiovascular system disease	rs76992529	dbSNP	18	31598655	31598655	A specific test for transthyretin 122 (Val----Ile), based on PCR-primer-introduced restriction analysis (PCR-PIRA): confirmation of the gene frequency in blacks.	Jacobson DR.	1992	1729888	PMC1682535	pathogenic	Variants (including SNPs and indels) imported from dbSNP
cardiovascular phenotype	DOID:1287	cardiovascular system disease	rs199472815	dbSNP	11	2778024	2778024	A spectrum of functional effects for disease causing mutations in the Jervell and Lange-Nielsen syndrome.	Huang L, Bitner-Glindzicz M, Tranebjaerg L, Tinker A.	2001	11530100		uncertain significance,not provided,likely pathogenic,pathogenic	Variants (including SNPs and indels) imported from dbSNP
cardiovascular phenotype	DOID:1287	cardiovascular system disease	rs199472815	dbSNP	CHR_HSCHR11_1_CTG7	2778024	2778024	A spectrum of functional effects for disease causing mutations in the Jervell and Lange-Nielsen syndrome.	Huang L, Bitner-Glindzicz M, Tranebjaerg L, Tinker A.	2001	11530100		uncertain significance,not provided,likely pathogenic,pathogenic	Variants (including SNPs and indels) imported from dbSNP
cardiovascular disease risk factors	DOID:1287	cardiovascular system disease	rs6511720	dbSNP	19	11091630	11091630	A Splice Region Variant in LDLR Lowers Non-high Density Lipoprotein Cholesterol and Protects against Coronary Artery Disease.	Gretarsdottir S, Helgason H, Helgadottir A, Sigurdsson A, Thorleifsson G, Magnusdottir A, Oddsson A, Steinthorsdottir V, Rafnar T, de Graaf J, Daneshpour MS, Hedayati M, Azizi F, Grarup N, JГёrgensen T, Vestergaard H, Hansen T, Eyjolfsson G, Sigurdardottir	2015	26327206	PMC4556698	benign	Variants (including SNPs and indels) imported from dbSNP
cardiovascular phenotype	DOID:1287	cardiovascular system disease	rs2228048	dbSNP	3	30672350	30672350	A sporadic case of Loeys-Dietz syndrome type I with two novel mutations of the TGFBR2 gene.	Ha JS, Kim YH.	2011	21949523	PMC3174364	benign	Variants (including SNPs and indels) imported from dbSNP
cardiovascular phenotype	DOID:1287	cardiovascular system disease	rs267607578	dbSNP	1	156136952	156136952	A Standardized DNA Variant Scoring System for Pathogenicity Assessments in Mendelian Disorders.	Karbassi I, Maston GA, Love A, DiVincenzo C, Braastad CD, Elzinga CD, Bright AR, Previte D, Zhang K, Rowland CM, McCarthy M, Lapierre JL, Dubois F, Medeiros KA, Batish SD, Jones J, Liaquat K, Hoffman CA, Jaremko M, Wang Z, Sun W, Buller-Burckle A, Strom C	2016	26467025	PMC4737317	likely pathogenic	Variants (including SNPs and indels) imported from dbSNP
cardiovascular phenotype	DOID:1287	cardiovascular system disease	rs56984562	dbSNP	1	156137666	156137666	A Standardized DNA Variant Scoring System for Pathogenicity Assessments in Mendelian Disorders.	Karbassi I, Maston GA, Love A, DiVincenzo C, Braastad CD, Elzinga CD, Bright AR, Previte D, Zhang K, Rowland CM, McCarthy M, Lapierre JL, Dubois F, Medeiros KA, Batish SD, Jones J, Liaquat K, Hoffman CA, Jaremko M, Wang Z, Sun W, Buller-Burckle A, Strom C	2016	26467025	PMC4737317	not provided,pathogenic	Variants (including SNPs and indels) imported from dbSNP
cardio-facio-cutaneous syndrome	DOID:0060233	cardiofaciocutaneous syndrome	rs121913341	dbSNP	7	140753350	140753350	A structural systems biology approach for quantifying the systemic consequences of missense mutations in proteins.	Cheng TM, Goehring L, Jeffery L, Lu YE, Hayles J, NovГЎk B, Bates PA.	2012	23093928	PMC3475653	likely pathogenic,pathogenic	Variants (including SNPs and indels) imported from dbSNP
cardio-facio-cutaneous syndrome	DOID:0060233	cardiofaciocutaneous syndrome	rs180177038	dbSNP	7	140778007	140778007	A structural systems biology approach for quantifying the systemic consequences of missense mutations in proteins.	Cheng TM, Goehring L, Jeffery L, Lu YE, Hayles J, NovГЎk B, Bates PA.	2012	23093928	PMC3475653	likely pathogenic,pathogenic	Variants (including SNPs and indels) imported from dbSNP
cardiofaciocutaneous syndrome 1	DOID:0060233	cardiofaciocutaneous syndrome	rs180177038	dbSNP	7	140778007	140778007	A structural systems biology approach for quantifying the systemic consequences of missense mutations in proteins.	Cheng TM, Goehring L, Jeffery L, Lu YE, Hayles J, NovГЎk B, Bates PA.	2012	23093928	PMC3475653	likely pathogenic,pathogenic	Variants (including SNPs and indels) imported from dbSNP
cardiovascular disease risk factors	DOID:1287	cardiovascular system disease	rs1800562	dbSNP	6	26092913	26092913	A study assessing the association of glycated hemoglobin A1C (HbA1C) associated variants with HbA1C, chronic kidney disease and diabetic retinopathy in populations of Asian ancestry.	Chen P, Ong RT, Tay WT, Sim X, Ali M, Xu H, Suo C, Liu J, Chia KS, Vithana E, Young TL, Aung T, Lim WY, Khor CC, Cheng CY, Wong TY, Teo YY, Tai ES.	2013	24244560	PMC3820602	uncertain significance,pathogenic,risk factor,association	Variants (including SNPs and indels) imported from dbSNP
cardiac arrest	DOID:0060319	cardiac arrest	rs111033560	dbSNP	6	118559037	118559037	A study in Polish patients with cardiomyopathy emphasizes pathogenicity of phospholamban (PLN) mutations at amino acid position 9 and low penetrance of heterozygous null PLN mutations.	Truszkowska GT, Bili?ska ZT, Kosi?ska J, ?leszycka J, Rydzanicz M, Sobieszcza?ska-Ma?ek M, Franaszczyk M, Bili?ska M, Stawi?ski P, Michalak E, Ma?ek ?A, Chmielewski P, Foss-Nieradko B, Machnicki MM, Stok?osa T, Poni?ska J, Szumowski ?, Grzybowski J, Piwo?	2015	25928149	PMC4421997	likely pathogenic,pathogenic	Variants (including SNPs and indels) imported from dbSNP
cardiomyopathy	DOID:0050700	cardiomyopathy	rs111033559	dbSNP	6	118558946	118558946	A study in Polish patients with cardiomyopathy emphasizes pathogenicity of phospholamban (PLN) mutations at amino acid position 9 and low penetrance of heterozygous null PLN mutations.	Truszkowska GT, Bili?ska ZT, Kosi?ska J, ?leszycka J, Rydzanicz M, Sobieszcza?ska-Ma?ek M, Franaszczyk M, Bili?ska M, Stawi?ski P, Michalak E, Ma?ek ?A, Chmielewski P, Foss-Nieradko B, Machnicki MM, Stok?osa T, Poni?ska J, Szumowski ?, Grzybowski J, Piwo?	2015	25928149	PMC4421997	pathogenic	Variants (including SNPs and indels) imported from dbSNP
cardiomyopathy	DOID:0050700	cardiomyopathy	rs111033560	dbSNP	6	118559037	118559037	A study in Polish patients with cardiomyopathy emphasizes pathogenicity of phospholamban (PLN) mutations at amino acid position 9 and low penetrance of heterozygous null PLN mutations.	Truszkowska GT, Bili?ska ZT, Kosi?ska J, ?leszycka J, Rydzanicz M, Sobieszcza?ska-Ma?ek M, Franaszczyk M, Bili?ska M, Stawi?ski P, Michalak E, Ma?ek ?A, Chmielewski P, Foss-Nieradko B, Machnicki MM, Stok?osa T, Poni?ska J, Szumowski ?, Grzybowski J, Piwo?	2015	25928149	PMC4421997	likely pathogenic,pathogenic	Variants (including SNPs and indels) imported from dbSNP
cardiovascular phenotype	DOID:1287	cardiovascular system disease	rs111033560	dbSNP	6	118559037	118559037	A study in Polish patients with cardiomyopathy emphasizes pathogenicity of phospholamban (PLN) mutations at amino acid position 9 and low penetrance of heterozygous null PLN mutations.	Truszkowska GT, Bili?ska ZT, Kosi?ska J, ?leszycka J, Rydzanicz M, Sobieszcza?ska-Ma?ek M, Franaszczyk M, Bili?ska M, Stawi?ski P, Michalak E, Ma?ek ?A, Chmielewski P, Foss-Nieradko B, Machnicki MM, Stok?osa T, Poni?ska J, Szumowski ?, Grzybowski J, Piwo?	2015	25928149	PMC4421997	likely pathogenic,pathogenic	Variants (including SNPs and indels) imported from dbSNP
familial hypertrophic cardiomyopathy 18	DOID:0080326	familial hypertrophic cardiomyopathy	rs111033560	dbSNP	6	118559037	118559037	A study in Polish patients with cardiomyopathy emphasizes pathogenicity of phospholamban (PLN) mutations at amino acid position 9 and low penetrance of heterozygous null PLN mutations.	Truszkowska GT, Bili?ska ZT, Kosi?ska J, ?leszycka J, Rydzanicz M, Sobieszcza?ska-Ma?ek M, Franaszczyk M, Bili?ska M, Stawi?ski P, Michalak E, Ma?ek ?A, Chmielewski P, Foss-Nieradko B, Machnicki MM, Stok?osa T, Poni?ska J, Szumowski ?, Grzybowski J, Piwo?	2015	25928149	PMC4421997	likely pathogenic,pathogenic	Variants (including SNPs and indels) imported from dbSNP
atrial septal defect 2	DOID:1882	atrial heart septal defect	rs56298569	dbSNP	8	11755082	11755082	A study of the role of GATA4 polymorphism in cardiovascular metabolic disorders.	Muiya NP, Wakil SM, Tahir AI, Hagos S, Najai M, Gueco D, Al-Tassan N, Andres E, Mazher N, Meyer BF, Dzimiri N.	2013	24330461	PMC3899629	pathogenic	Variants (including SNPs and indels) imported from dbSNP
atrial septal defect 2	DOID:1882	atrial heart septal defect	rs56298569	dbSNP	CHR_HG76_PATCH	8197731	8197731	A study of the role of GATA4 polymorphism in cardiovascular metabolic disorders.	Muiya NP, Wakil SM, Tahir AI, Hagos S, Najai M, Gueco D, Al-Tassan N, Andres E, Mazher N, Meyer BF, Dzimiri N.	2013	24330461	PMC3899629	pathogenic	Variants (including SNPs and indels) imported from dbSNP
cardiovascular phenotype	DOID:1287	cardiovascular system disease	rs3729856	dbSNP	8	11757066	11757066	A study of the role of GATA4 polymorphism in cardiovascular metabolic disorders.	Muiya NP, Wakil SM, Tahir AI, Hagos S, Najai M, Gueco D, Al-Tassan N, Andres E, Mazher N, Meyer BF, Dzimiri N.	2013	24330461	PMC3899629	benign,likely pathogenic	Variants (including SNPs and indels) imported from dbSNP
cardiovascular phenotype	DOID:1287	cardiovascular system disease	rs3729856	dbSNP	CHR_HG76_PATCH	8195747	8195747	A study of the role of GATA4 polymorphism in cardiovascular metabolic disorders.	Muiya NP, Wakil SM, Tahir AI, Hagos S, Najai M, Gueco D, Al-Tassan N, Andres E, Mazher N, Meyer BF, Dzimiri N.	2013	24330461	PMC3899629	benign,likely pathogenic	Variants (including SNPs and indels) imported from dbSNP
cardiomyopathy	DOID:0050700	cardiomyopathy	rs199476316	dbSNP	15	63062219	63062219	A study of tropomyosin's role in cardiac function and disease using thin-filament reconstituted myocardium.	Bai F, Wang L, Kawai M.	2013	23700264	PMC3849125	uncertain significance,likely pathogenic,pathogenic	Variants (including SNPs and indels) imported from dbSNP
cardiovascular phenotype	DOID:1287	cardiovascular system disease	rs199476316	dbSNP	15	63062219	63062219	A study of tropomyosin's role in cardiac function and disease using thin-filament reconstituted myocardium.	Bai F, Wang L, Kawai M.	2013	23700264	PMC3849125	uncertain significance,likely pathogenic,pathogenic	Variants (including SNPs and indels) imported from dbSNP
cardiovascular disease	DOID:1287	cardiovascular system disease	rs7412	dbSNP	19	44908822	44908822	A study protocol for an observational cohort investigating COGnitive outcomes and WELLness in survivors of critical illness: the COGWELL study.	Wilcox ME, Lim AS, McAndrews MP, Wennberg RA, Pinto RL, Black SE, Walczak KD, Friedrich JO, Taglione MS, Rubenfeld GD.	2017	28710215	PMC5734403	pathogenic,drug response,other	Variants (including SNPs and indels) imported from dbSNP
cardiovascular risk factors	DOID:1287	cardiovascular system disease	rs7412	dbSNP	19	44908822	44908822	A study protocol for an observational cohort investigating COGnitive outcomes and WELLness in survivors of critical illness: the COGWELL study.	Wilcox ME, Lim AS, McAndrews MP, Wennberg RA, Pinto RL, Black SE, Walczak KD, Friedrich JO, Taglione MS, Rubenfeld GD.	2017	28710215	PMC5734403	pathogenic,drug response,other	Variants (including SNPs and indels) imported from dbSNP
cardiovascular phenotype	DOID:1287	cardiovascular system disease	rs120074189	dbSNP	11	2778003	2778003	A subset of dorsal neurons modulates circadian behavior and light responses in Drosophila.	Murad A, Emery-Le M, Emery P.	2007	17329209	PMC1852515	not provided,pathogenic	Variants (including SNPs and indels) imported from dbSNP
cardiovascular phenotype	DOID:1287	cardiovascular system disease	rs120074189	dbSNP	CHR_HSCHR11_1_CTG7	2778003	2778003	A subset of dorsal neurons modulates circadian behavior and light responses in Drosophila.	Murad A, Emery-Le M, Emery P.	2007	17329209	PMC1852515	not provided,pathogenic	Variants (including SNPs and indels) imported from dbSNP
cardiovascular phenotype	DOID:1287	cardiovascular system disease	rs120074190	dbSNP	11	2778009	2778009	A subset of dorsal neurons modulates circadian behavior and light responses in Drosophila.	Murad A, Emery-Le M, Emery P.	2007	17329209	PMC1852515	not provided,pathogenic	Variants (including SNPs and indels) imported from dbSNP
cardiovascular phenotype	DOID:1287	cardiovascular system disease	rs120074190	dbSNP	CHR_HSCHR11_1_CTG7	2778009	2778009	A subset of dorsal neurons modulates circadian behavior and light responses in Drosophila.	Murad A, Emery-Le M, Emery P.	2007	17329209	PMC1852515	not provided,pathogenic	Variants (including SNPs and indels) imported from dbSNP
cardiovascular phenotype	DOID:1287	cardiovascular system disease	rs199472813	dbSNP	11	2778011	2778011	A subset of dorsal neurons modulates circadian behavior and light responses in Drosophila.	Murad A, Emery-Le M, Emery P.	2007	17329209	PMC1852515	uncertain significance,not provided,likely pathogenic	Variants (including SNPs and indels) imported from dbSNP
cardiovascular phenotype	DOID:1287	cardiovascular system disease	rs199472813	dbSNP	CHR_HSCHR11_1_CTG7	2778011	2778011	A subset of dorsal neurons modulates circadian behavior and light responses in Drosophila.	Murad A, Emery-Le M, Emery P.	2007	17329209	PMC1852515	uncertain significance,not provided,likely pathogenic	Variants (including SNPs and indels) imported from dbSNP
cardiovascular phenotype	DOID:1287	cardiovascular system disease	rs199472815	dbSNP	11	2778024	2778024	A subset of dorsal neurons modulates circadian behavior and light responses in Drosophila.	Murad A, Emery-Le M, Emery P.	2007	17329209	PMC1852515	uncertain significance,not provided,likely pathogenic,pathogenic	Variants (including SNPs and indels) imported from dbSNP
cardiovascular phenotype	DOID:1287	cardiovascular system disease	rs199472815	dbSNP	CHR_HSCHR11_1_CTG7	2778024	2778024	A subset of dorsal neurons modulates circadian behavior and light responses in Drosophila.	Murad A, Emery-Le M, Emery P.	2007	17329209	PMC1852515	uncertain significance,not provided,likely pathogenic,pathogenic	Variants (including SNPs and indels) imported from dbSNP
cardiovascular disease risk factors	DOID:1287	cardiovascular system disease	rs1260326	dbSNP	2	27508073	27508073	A survey of the genetics of stomach, liver, and adipose gene expression from a morbidly obese cohort.	Greenawalt DM, Dobrin R, Chudin E, Hatoum IJ, Suver C, Beaulaurier J, Zhang B, Castro V, Zhu J, Sieberts SK, Wang S, Molony C, Heymsfield SB, Kemp DM, Reitman ML, Lum PY, Schadt EE, Kaplan LM.	2011	21602305	PMC3129244	association	Variants (including SNPs and indels) imported from dbSNP
cardiovascular disease	DOID:1287	cardiovascular system disease	rs7412	dbSNP	19	44908822	44908822	A susceptible haplotype within APOE gene influences BMD and intensifies the osteoporosis risk in postmenopausal women of Northwest India.	Singh M, Singh P, Singh S, Juneja PK, Kaur T.	2010	20663622		pathogenic,drug response,other	Variants (including SNPs and indels) imported from dbSNP
cardiovascular risk factors	DOID:1287	cardiovascular system disease	rs7412	dbSNP	19	44908822	44908822	A susceptible haplotype within APOE gene influences BMD and intensifies the osteoporosis risk in postmenopausal women of Northwest India.	Singh M, Singh P, Singh S, Juneja PK, Kaur T.	2010	20663622		pathogenic,drug response,other	Variants (including SNPs and indels) imported from dbSNP
cardiomyopathy	DOID:0050700	cardiomyopathy	rs28933979	dbSNP	18	31592974	31592974	A Swedish family with the rare Phe33Leu transthyretin mutation.	Holmgren G, Hellman U, Jonasson J, Lundgren HE, Westermark P, Suhr OB.	2005	16194875		pathogenic	Variants (including SNPs and indels) imported from dbSNP
atrial fibrillation	DOID:0060224	atrial fibrillation	rs199473335	dbSNP	3	38550411	38550411	A systematic approach to assessing the clinical significance of genetic variants.	Duzkale H, Shen J, McLaughlin H, Alfares A, Kelly MA, Pugh TJ, Funke BH, Rehm HL, Lebo MS.	2013	24033266	PMC3995020	uncertain significance,pathogenic	Variants (including SNPs and indels) imported from dbSNP
atrial fibrillation	DOID:0060224	atrial fibrillation	rs2306272	dbSNP	3	66384219	66384219	A systematic approach to assessing the clinical significance of genetic variants.	Duzkale H, Shen J, McLaughlin H, Alfares A, Kelly MA, Pugh TJ, Funke BH, Rehm HL, Lebo MS.	2013	24033266	PMC3995020	benign	Variants (including SNPs and indels) imported from dbSNP
atrial fibrillation	DOID:0060224	atrial fibrillation	rs2306272	dbSNP	CHR_HG2235_PATCH	66384315	66384315	A systematic approach to assessing the clinical significance of genetic variants.	Duzkale H, Shen J, McLaughlin H, Alfares A, Kelly MA, Pugh TJ, Funke BH, Rehm HL, Lebo MS.	2013	24033266	PMC3995020	benign	Variants (including SNPs and indels) imported from dbSNP
atrial fibrillation	DOID:0060224	atrial fibrillation	rs41315493	dbSNP	3	38550521	38550521	A systematic approach to assessing the clinical significance of genetic variants.	Duzkale H, Shen J, McLaughlin H, Alfares A, Kelly MA, Pugh TJ, Funke BH, Rehm HL, Lebo MS.	2013	24033266	PMC3995020	uncertain significance,not provided,benign,likely benign,likely pathogenic	Variants (including SNPs and indels) imported from dbSNP
atrial fibrillation	DOID:0060224	atrial fibrillation	rs2296610	dbSNP	10	20868692	20868692	A systematic approach to assessing the clinical significance of genetic variants.	Duzkale H, Shen J, McLaughlin H, Alfares A, Kelly MA, Pugh TJ, Funke BH, Rehm HL, Lebo MS.	2013	24033266	PMC3995020	benign	Variants (including SNPs and indels) imported from dbSNP
atrial fibrillation	DOID:0060224	atrial fibrillation	rs1805123	dbSNP	7	150948446	150948446	A systematic approach to assessing the clinical significance of genetic variants.	Duzkale H, Shen J, McLaughlin H, Alfares A, Kelly MA, Pugh TJ, Funke BH, Rehm HL, Lebo MS.	2013	24033266	PMC3995020	uncertain significance,benign,likely benign	Variants (including SNPs and indels) imported from dbSNP
atrial fibrillation familial 10	DOID:0050650	familial atrial fibrillation	rs199473335	dbSNP	3	38550411	38550411	A systematic approach to assessing the clinical significance of genetic variants.	Duzkale H, Shen J, McLaughlin H, Alfares A, Kelly MA, Pugh TJ, Funke BH, Rehm HL, Lebo MS.	2013	24033266	PMC3995020	uncertain significance,pathogenic	Variants (including SNPs and indels) imported from dbSNP
atrial fibrillation familial 13	DOID:0050650	familial atrial fibrillation	rs66876876	dbSNP	19	35033932	35033932	A systematic approach to assessing the clinical significance of genetic variants.	Duzkale H, Shen J, McLaughlin H, Alfares A, Kelly MA, Pugh TJ, Funke BH, Rehm HL, Lebo MS.	2013	24033266	PMC3995020	uncertain significance	Variants (including SNPs and indels) imported from dbSNP
atrial fibrillation familial 13	DOID:0050650	familial atrial fibrillation	rs72550247	dbSNP	19	35039125	35039125	A systematic approach to assessing the clinical significance of genetic variants.	Duzkale H, Shen J, McLaughlin H, Alfares A, Kelly MA, Pugh TJ, Funke BH, Rehm HL, Lebo MS.	2013	24033266	PMC3995020	uncertain significance,pathogenic	Variants (including SNPs and indels) imported from dbSNP
atrial fibrillation familial 16	DOID:0050650	familial atrial fibrillation	rs121918282	dbSNP	11	123653773	123653773	A systematic approach to assessing the clinical significance of genetic variants.	Duzkale H, Shen J, McLaughlin H, Alfares A, Kelly MA, Pugh TJ, Funke BH, Rehm HL, Lebo MS.	2013	24033266	PMC3995020	uncertain significance,likely pathogenic,pathogenic	Variants (including SNPs and indels) imported from dbSNP
atrial fibrillation familial 3	DOID:0050650	familial atrial fibrillation	rs199472787	dbSNP	11	2768884	2768884	A systematic approach to assessing the clinical significance of genetic variants.	Duzkale H, Shen J, McLaughlin H, Alfares A, Kelly MA, Pugh TJ, Funke BH, Rehm HL, Lebo MS.	2013	24033266	PMC3995020	uncertain significance,not provided	Variants (including SNPs and indels) imported from dbSNP
atrial fibrillation familial 3	DOID:0050650	familial atrial fibrillation	rs199472787	dbSNP	CHR_HSCHR11_1_CTG7	2768884	2768884	A systematic approach to assessing the clinical significance of genetic variants.	Duzkale H, Shen J, McLaughlin H, Alfares A, Kelly MA, Pugh TJ, Funke BH, Rehm HL, Lebo MS.	2013	24033266	PMC3995020	uncertain significance,not provided	Variants (including SNPs and indels) imported from dbSNP
atrial fibrillation familial 3	DOID:0050650	familial atrial fibrillation	rs397515877	dbSNP	11	2445251	2445266	A systematic approach to assessing the clinical significance of genetic variants.	Duzkale H, Shen J, McLaughlin H, Alfares A, Kelly MA, Pugh TJ, Funke BH, Rehm HL, Lebo MS.	2013	24033266	PMC3995020	uncertain significance,benign,likely benign,pathogenic	Variants (including SNPs and indels) imported from dbSNP
atrial fibrillation familial 7	DOID:0050650	familial atrial fibrillation	rs2359641	dbSNP	12	5045296	5045296	A systematic approach to assessing the clinical significance of genetic variants.	Duzkale H, Shen J, McLaughlin H, Alfares A, Kelly MA, Pugh TJ, Funke BH, Rehm HL, Lebo MS.	2013	24033266	PMC3995020	benign,likely benign	Variants (including SNPs and indels) imported from dbSNP
[truncated: 34,746 more rows]
