# Supplementary material for: The atlas of human cardiac promoters and enhancers reveals an important role for regulatory elements in heart failure
Source: Research Square preprint supplement (doi:10.21203/rs.3.rs-1010746/v1), 2021-10-28
Supplement: Supplementary file 3 [file db74aef2868869654576d476.xlsx]

## Sheet: Supplementary Table 2
# Supplementary Table 2
# Libraries obtained from Encode and used in the analysis
Method	Source	Description	ID	File format	Output type
DNase-seq	cardiac muscle cell	originated from RUES2	ENCFF054OJL	narrowPeak	peaks
DNase-seq	cardiac muscle cell	originated from RUES2	ENCFF998UGK	narrowPeak	peaks
CTCF	cardiac muscle cell	originated from RUES2	ENCFF863ZIN	narrowPeak	pseudoreplicated IDR thresholded peaks
H3K4me3	cardiac muscle cell	originated from RUES2	ENCFF905NTT	narrowPeak	replicated peaks
H3K9me3	cardiac muscle cell	originated from RUES2	ENCFF677NKI	narrowPeak	replicated peaks
H3K4me1	cardiac muscle cell	originated from RUES2	ENCFF477XWO	narrowPeak	replicated peaks
H3K27me3	cardiac muscle cell	originated from RUES2	ENCFF289NJD	narrowPeak	replicated peaks
H3K36me3	cardiac muscle cell	originated from RUES2	ENCFF445HCF	narrowPeak	replicated peaks
H3K27ac	cardiac muscle cell	originated from RUES2	ENCFF287NJM	narrowPeak	replicated peaks
polyA plus RNA-seq	cardiac muscle cell	originated from RUES2	ENCFF512CYM	counts	polyA plus RNA-seq
polyA plus RNA-seq	cardiac muscle cell	originated from RUES2	ENCFF779ECX	counts	polyA plus RNA-seq
RNA-seq (total RNA-seq)	cardiac muscle cell	originated from RUES2	ENCFF670DXG	counts	RNA-seq (total RNA-seq)
RNA-seq (total RNA-seq)	cardiac muscle cell	originated from RUES2	ENCFF254TVP	counts	RNA-seq (total RNA-seq)
DNase-seq	cardiac muscle cell	H7-hESC differentiated for 14 days	ENCFF270RWU	narrowPeak	peaks
DNase-seq	cardiac muscle cell	H7-hESC differentiated for 14 days	ENCFF582CFS	narrowPeak	peaks
H3K4me3	cardiac muscle cell	H7-hESC differentiated for 14 days	ENCFF967OLB	narrowPeak	replicated peaks
H3K36me3	cardiac muscle cell	H7-hESC differentiated for 14 days	ENCFF589EOA	narrowPeak	replicated peaks
H3K27me3	cardiac muscle cell	H7-hESC differentiated for 14 days	ENCFF075QJU	narrowPeak	replicated peaks
H3K9me3	heart	embryo (101 days)	ENCFF798JKX	narrowPeak	stable peaks
H3K9ac	heart	male embryo (105 days)	ENCFF237EFK	narrowPeak	stable peaks
H3K4me3	heart	male embryo (91 days)	ENCFF669SXT	narrowPeak	stable peaks
H3K4me1	heart	male embryo (105 days)	ENCFF276NNN	narrowPeak	stable peaks
H3K4me1	heart	male embryo (91 days)	ENCFF086YUN	narrowPeak	stable peaks
H3K36me3	heart	embryo (101 days)	ENCFF656WWM	narrowPeak	stable peaks
H3K27me3	heart	embryo (101 days)	ENCFF164CBW	narrowPeak	stable peaks
DNase-seq	heart	embryo (101 days)	ENCFF262FPE	narrowPeak	peaks
DNase-seq	heart	male embryo (96 days)	ENCFF031SHA	narrowPeak	peaks
DNase-seq	heart	male embryo (105 days)	ENCFF642WZB	narrowPeak	peaks
DNase-seq	cardiac myoblast	H7-hESC differentiated for 9 days	ENCFF447FMT	narrowPeak	peaks
H3K27me3	cardiac myoblast	H7-hESC differentiated for 9 days	ENCFF852RJF	narrowPeak	replicated peaks
H3K36me3	cardiac myoblast	H7-hESC differentiated for 9 days	ENCFF907HWV	narrowPeak	replicated peaks
H3K4me3	cardiac myoblast	H7-hESC differentiated for 9 days	ENCFF641UFJ	narrowPeak	replicated peaks
DNase-seq	cardiovascular progenitor cell	H7-hESC differentiated for 5 days	ENCFF357OCI	narrowPeak	peaks
DNase-seq	cardiovascular progenitor cell	H7-hESC differentiated for 5 days	ENCFF677OBC	narrowPeak	peaks
H3K4me3	cardiovascular progenitor cell	H7-hESC differentiated for 5 days	ENCFF104EEJ	narrowPeak	replicated peaks
H3K27me3	cardiovascular progenitor cell	H7-hESC differentiated for 5 days	ENCFF385RUL	narrowPeak	replicated peaks
H3K36me3	cardiovascular progenitor cell	H7-hESC differentiated for 5 days	ENCFF123EGK	narrowPeak	replicated peaks
H3K27ac	heart	left ventricle female adult (51 years)	ENCFF258ZRC	narrowPeak	stable peaks
H3K4me1	heart	left ventricle female adult (51 years)	ENCFF109HTK	narrowPeak	stable peaks
H3K4me3	heart	left ventricle female adult (51 years)	ENCFF166XXQ	narrowPeak	stable peaks
H3K27me3	heart	left ventricle female adult (51 years)	ENCFF255MWF	narrowPeak	stable peaks
H3K36me3	heart	left ventricle female adult (51 years)	ENCFF756CJQ	narrowPeak	stable peaks
H3K9me3	heart	left ventricle female adult (51 years)	ENCFF496FKE	narrowPeak	stable peaks
POLR2A	heart	left ventricle female adult (51 years)	ENCFF226GKH	narrowPeak	pseudoreplicated IDR thresholded peaks
POLR2A	heart	left ventricle female adult (53 years)	ENCFF156SPI	narrowPeak	pseudoreplicated IDR thresholded peaks
ATAC-seq	heart	left ventricle female adult (51 years)	ENCFF112NVU	narrowPeak	IDR thresholded peaks
CTCF	heart	left ventricle female adult (51 years)	ENCFF833YST	narrowPeak	pseudoreplicated IDR thresholded peaks
CTCF	heart	left ventricle female adult (53 years)	ENCFF552XDP	narrowPeak	pseudoreplicated IDR thresholded peaks
H3K4me3	heart	left ventricle female adult (53 years)	ENCFF175CMC	narrowPeak	stable peaks
DNase-seq	heart	left ventricle female adult (53 years)	ENCFF146VYU	narrowPeak	peaks
ATAC-seq	heart	left ventricle female adult (53 years)	ENCFF250CRB	narrowPeak	IDR thresholded peaks
H3K36me3	heart	left ventricle female adult (53 years)	ENCFF995ILL	narrowPeak	replicated peaks
H3K27ac	heart	left ventricle female adult (53 years)	ENCFF170EQJ	narrowPeak	stable peaks
H3K27me3	heart	left ventricle female adult (53 years)	ENCFF229DOE	narrowPeak	stable peaks
H3K9me3	heart	left ventricle female adult (53 years)	ENCFF433HZN	narrowPeak	stable peaks
H3K4me1	heart	left ventricle female adult (53 years)	ENCFF882JWG	narrowPeak	stable peaks
microRNA-seq	heart	left ventricle female adult (51 years)	ENCFF855XWL	counts	microRNA-seq
microRNA-seq	heart	left ventricle female adult (51 years)	ENCFF394ILT	counts	microRNA-seq
microRNA-seq	heart	left ventricle female adult (53 years)	ENCFF753UVR	counts	microRNA-seq
microRNA-seq	heart	left ventricle female adult (53 years)	ENCFF423HWS	counts	microRNA-seq
RNA-seq (total RNA-seq)	heart	left ventricle female adult (51 years)	ENCFF743CAA	counts	RNA-seq (total RNA-seq)
RNA-seq (total RNA-seq)	heart	left ventricle female adult (53 years)	ENCFF843PMO	counts	RNA-seq (total RNA-seq)
H3K9me3	heart	left ventricle male adult (34 years)	ENCFF174BKG	narrowPeak	stable peaks
H3K9me3	heart	left ventricle male child (3 years)	ENCFF295KYS	narrowPeak	stable peaks
RAMPAGE	heart	heart male adult (34 years)	ENCFF012RXD	tss_peak	transcription start sites
RAMPAGE	heart	female embryo (28 weeks) heart tissue	ENCFF503CZU	tss_peak	transcription start sites
RAMPAGE	heart	female embryo (19 weeks) heart tissue	ENCFF235ILS	tss_peak	transcription start sites
RAMPAGE	cardiac atrium fibroblast	male child (2 years)	ENCFF276DFJ	tss_peak	transcription start sites
RAMPAGE	cardiac atrium fibroblast	male child (2 years)	ENCFF378STZ	tss_peak	transcription start sites
RAMPAGE	cardiac ventricle fibroblast	male adult (18 years)	ENCFF473GWT	tss_peak	transcription start sites
RAMPAGE	cardiac ventricle fibroblast	NONE	ENCFF002HAE	tss_peak	transcription start sites
RAMPAGE	cardiac muscle cell	originated from RUES2	ENCFF553LTO	tss_peak	transcription start sites
RAMPAGE	cardiac muscle cell	originated from RUES2	ENCFF226OYR	tss_peak	transcription start sites
